# Supplementary material for: 1,2-Aminohalogenation of arynes with amines and organohalides
Source: Royal Society of Chemistry journal article supplement (doi:10.1039/c9cc05505c), 2019-01-01
Supplement: c9cc05505c1.pdf [file c9cc05505c1.pdf]

## 1,2-Aminohalogenation of arynes with amines and organohalides

Sheng-Jun Li<sup>a</sup>, Lu Han<sup>a</sup> and Shi-Kai Tian<sup>\*ab</sup>

<sup>a</sup> Hefei National Laboratory for Physical Sciences at the Microscale, Center for Excellence in Molecular Synthesis, and Department of Chemistry, University of Science and Technology of China, Hefei, Anhui 230026, China

E-mail: tiansk@ustc.edu.cn

<sup>b</sup> Key Laboratory of Synthetic Chemistry of Natural Substances, Shanghai Institute of Organic Chemistry, Chinese Academy of Sciences, Shanghai 200032, China

### Supporting information

#### Table of contents

|                                                                                                                       |     |
|-----------------------------------------------------------------------------------------------------------------------|-----|
| General information.....                                                                                              | S2  |
| General procedure for the three-component reaction of amines, arynes, and carbon tetrachloride (Schemes 3 and 4)..... | S2  |
| Analytical data for the products (Schemes 3 and 4).....                                                               | S3  |
| Reaction of various organohalides (Scheme 5).....                                                                     | S10 |
| Control experiments.....                                                                                              | S11 |
| References.....                                                                                                       | S12 |
| Copies of NMR spectra.....                                                                                            | S13 |

## General information

$^1\text{H}$  NMR and  $^{13}\text{C}$  NMR spectra were recorded on a Bruker AC-400 FT spectrometer (400 MHz and 100 MHz, respectively) using tetramethylsilane as an internal reference. NMR multiplicities were abbreviated as follows: s = singlet, d = doublet, t = triplet, q = quartet, m = multiplet, br = broad. Chemical shifts ( $\delta$ ) and coupling constants ( $J$ ) were expressed in ppm and Hz, respectively. Infrared spectra were recorded on Thermo Scientific Nicolet iS10 spectrophotometer. High resolution mass spectra (HRMS) were recorded on a LC-TOF spectrometer (Micromass). ESI-mass data were acquired using a Thermo LTQ Orbitrap XL instrument equipped with an ESI source and controlled by Xcalibur software. EI-mass data was acquired using a Thermo Q Exactive GC Orbitrap GC-MS/MS instrument equipped with an EI source and controlled by Xcalibur software. Melting points are uncorrected.

$\text{Ph}(\text{CH}_2)_3\text{NMe}_2$  (**1m**) and amines **1o-q** were prepared according to literature procedures.<sup>1-3</sup> The rest of chemicals were purchased from the Sinopharm Chemical Reagent Co., Energy chemical, Bide Pharmatech Ltd., Accela ChemBio Co., J&K Scientific, Meryer, Acros, Alfa Aesar, and TCI.

Unless otherwise noted, all the reactions were performed in oven-dried glassware with freshly distilled solvents.

Abbreviations: Bn = benzyl, DCE = 1, 2-dichloroethane, DMF = *N,N*-dimethylformamide, DMSO = dimethyl sulfoxide, NBS = *N*-bromosuccinimide, NCS = *N*-chlorosuccinimide, NIS = *N*-iodosuccinimide, TEMPO = 2,2,6,6-tetramethyl-1-piperidinyloxy, THF = tetrahydrofuran, TMS = trimethylsilyl, Tf = trifluoromethanesulfonyl.

## General procedure for the three-component reaction of amines, arynes, and carbon tetrachloride (Schemes 3 and 4)

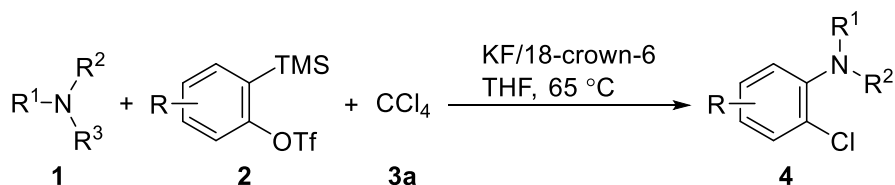

Sealed reaction tubes containing dry KF (34.9 mg, 0.60 mmol) and 18-crown-6 (159 mg, 0.60 mmol) were sequentially added tetrahydrofuran (0.20 mL), carbon tetrachloride (**3a**) (0.10 mL), amine **1** (0.20 mmol), and 2-(trimethylsilyl)aryl triflate **2** (0.30 mmol). The mixture was stirred at  $65\text{ }^\circ\text{C}$  for 10 h, cooled to room temperature, and purified directly by silica gel chromatography with the mixture eluent of ethyl acetate and petroleum ether (1:4 to 0:1 v/v), to give compound **4**.

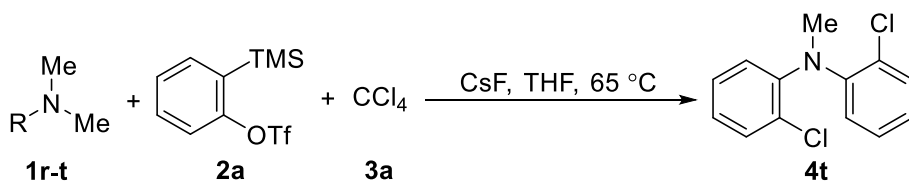

Sealed reaction tubes containing dry CsF (91.1 mg, 0.60 mmol) were sequentially added tetrahydrofuran (0.20 mL), carbon tetrachloride (**3a**) (0.10 mL), amine **1r-t** (0.20 mmol), and 2-(trimethylsilyl)phenyl triflate (**2a**) (89.5 mg, 0.30 mmol). The mixture was stirred at  $65\text{ }^\circ\text{C}$  for 12 h, cooled to room temperature, and purified directly by silica gel chromatography with the mixture

eluent of ethyl acetate and petroleum ether (1:40 v/v), to give compound **4t**.

#### Analytical data for the products (Schemes 3 and 4)

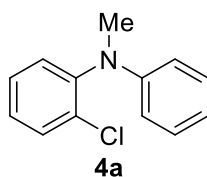

2-Chloro-*N*-methyl-*N*-phenylaniline (**4a**). Yellow oil (41.3 mg, 95% yield);  $^1\text{H}$  NMR (400 MHz,  $\text{CDCl}_3$ )  $\delta$  7.47 (d,  $J = 7.6$  Hz, 1H), 7.29-7.24 (m, 2H), 7.21-7.15 (m, 3H), 6.75 (t,  $J = 7.2$  Hz, 1H), 6.59 (d,  $J = 8.0$  Hz, 2H), 3.23 (s, 3H);  $^{13}\text{C}$  NMR (100 MHz,  $\text{CDCl}_3$ )  $\delta$  148.7, 145.4, 133.7, 131.0, 130.3, 129.1, 128.3, 127.4, 117.9, 113.6, 39.1; IR (film,  $\text{v}/\text{cm}^{-1}$ ) 3069, 2983, 2924, 2820, 1592, 1478, 1420, 1213, 1144, 1050, 995, 921, 845, 758, 599; HRMS (ESI) calcd for  $\text{C}_{13}\text{H}_{13}\text{N}^{35}\text{Cl}^+$  ( $\text{M} + \text{H}^+$ ) 218.0731, found 218.0735.

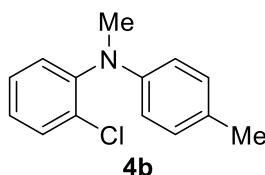

2-Chloro-*N*-methyl-*N*-(*p*-tolyl)aniline (**4b**). Yellow oil (41.8 mg, 90% yield);  $^1\text{H}$  NMR (400 MHz,  $\text{CDCl}_3$ )  $\delta$  7.46-7.42 (m, 1H), 7.27-7.21 (m, 2H), 7.17-7.12 (m, 1H), 7.01-6.96 (m, 2H), 6.55-6.50 (m, 2H), 3.21 (s, 3H), 2.24 (s, 3H);  $^{13}\text{C}$  NMR (100 MHz,  $\text{CDCl}_3$ )  $\delta$  146.6, 145.9, 133.4, 131.0, 129.8, 129.6, 128.2, 127.3, 127.0, 114.1, 39.3, 20.5; IR (film,  $\text{v}/\text{cm}^{-1}$ ) 3035, 2915, 1617, 1513, 1479, 1333, 1050, 903, 809, 731, 651; HRMS (ESI) calcd for  $\text{C}_{14}\text{H}_{15}\text{N}^{35}\text{Cl}^+$  ( $\text{M} + \text{H}^+$ ) 232.0888, found 232.0881.

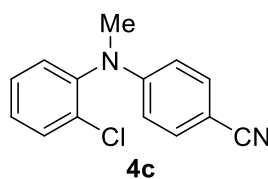

4-((2-Chlorophenyl)(methyl)amino)benzonitrile (**4c**). Yellow oil (38.6 mg, 80% yield);  $^1\text{H}$  NMR (400 MHz,  $\text{CDCl}_3$ )  $\delta$  7.53 (dd,  $J = 8.0, 1.6$  Hz, 1H), 7.42 (d,  $J = 8.8$  Hz, 2H), 7.39-7.30 (m, 2H), 7.27 (dd,  $J = 7.6, 1.6$  Hz, 1H), 6.52 (d,  $J = 8.8$  Hz, 2H), 3.29 (s, 3H);  $^{13}\text{C}$  NMR (100 MHz,  $\text{CDCl}_3$ )  $\delta$  151.4, 143.1, 133.6, 133.4, 131.2, 130.4, 128.9, 128.7, 120.4, 112.5, 99.2, 38.9; IR (film,  $\text{v}/\text{cm}^{-1}$ ) 3069, 2924, 2829, 2219, 1599, 1513, 1481, 1359, 1178, 1050, 904, 826, 731; HRMS (ESI) calcd for  $\text{C}_{14}\text{H}_{12}\text{N}_2^{35}\text{Cl}^+$  ( $\text{M} + \text{H}^+$ ) 243.0684, found 243.0681.

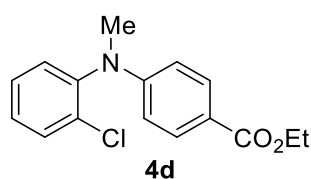

Ethyl 4-((2-chlorophenyl)(methyl)amino)benzoate (**4d**). Yellow oil (35.7 mg, 62% yield);  $^1\text{H}$  NMR (400 MHz,  $\text{CDCl}_3$ )  $\delta$  7.88 (d,  $J = 8.8$  Hz, 2H), 7.49 (dd,  $J = 8.0, 1.2$  Hz, 1H), 7.34-7.22 (m, 3H), 6.51 (d,  $J = 8.8$  Hz, 2H), 4.30 (q,  $J = 7.2$  Hz, 2H), 3.27 (s, 3H), 1.33 (t,  $J = 7.2$  Hz, 3H);  $^{13}\text{C}$  NMR (100 MHz,  $\text{CDCl}_3$ )  $\delta$  166.7, 151.8, 143.8, 133.6, 131.1, 131.0, 130.4, 128.5, 128.4, 119.0, 111.8, 60.2, 38.9, 14.4; IR (film,  $\nu/\text{cm}^{-1}$ ) 3069, 2983, 2897, 1703, 1608, 1512, 1478, 1356, 1273, 1178, 1100, 1049, 833, 766, 732, 689; HRMS (ESI) calcd for  $\text{C}_{16}\text{H}_{17}\text{O}_2\text{N}^{35}\text{Cl}^+$  ( $\text{M} + \text{H}$ ) $^+$  290.0942, found 290.0936.

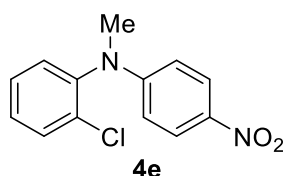

2-Chloro-*N*-methyl-*N*-(4-nitrophenyl)aniline (**4e**). Pale green oil (44.7 mg, 85% yield);  $^1\text{H}$  NMR (400 MHz,  $\text{CDCl}_3$ )  $\delta$  8.08 (d,  $J = 9.2$  Hz, 2H), 7.56 (dd,  $J = 7.6, 1.6$  Hz, 1H), 7.40 (td,  $J = 7.6, 1.6$  Hz, 1H), 7.35 (td,  $J = 7.6, 2.0$  Hz, 1H), 7.30 (dd,  $J = 7.6, 2.0$  Hz, 1H), 6.49 (d,  $J = 9.2$  Hz, 2H), 3.35 (s, 3H);  $^{13}\text{C}$  NMR (100 MHz,  $\text{CDCl}_3$ )  $\delta$  153.3, 142.9, 138.5, 133.5, 131.4, 130.3, 129.3, 128.9, 126.0, 111.6, 39.4; IR (film,  $\nu/\text{cm}^{-1}$ ) 3078, 2924, 2855, 1591, 1488, 1307, 1187, 1101, 1058, 911, 826, 735, 679; HRMS (ESI) calcd for  $\text{C}_{13}\text{H}_{12}\text{O}_2\text{N}_2^{35}\text{Cl}^+$  ( $\text{M} + \text{H}$ ) $^+$  263.0582, found 263.0583.

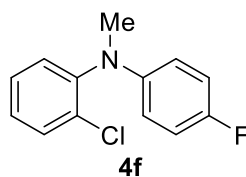

2-Chloro-*N*-(4-fluorophenyl)-*N*-methylaniline (**4f**). Yellow oil (43.4 mg, 92% yield);  $^1\text{H}$  NMR (400 MHz,  $\text{CDCl}_3$ )  $\delta$  7.44 (dd,  $J = 8.0, 1.6$  Hz, 1H), 7.28-7.13 (m, 3H), 6.91-6.84 (m, 2H), 6.56-6.50 (m, 2H), 3.20 (s, 3H);  $^{13}\text{C}$  NMR (100 MHz,  $\text{CDCl}_3$ )  $\delta$  156.3 (d,  $J = 235.0$  Hz), 145.7, 145.3 (d,  $J = 1.8$  Hz), 133.3, 131.1, 129.7, 128.3, 127.3, 115.5 (d,  $J = 22.1$  Hz), 115.0 (d,  $J = 7.4$  Hz), 39.6; IR (film,  $\nu/\text{cm}^{-1}$ ) 3061, 2915, 2811, 1505, 1479, 1333, 1230, 1050, 809, 756, 735; HRMS (ESI) calcd for  $\text{C}_{13}\text{H}_{12}\text{N}^{35}\text{ClF}^+$  ( $\text{M} + \text{H}$ ) $^+$  236.0637, found 236.0635.

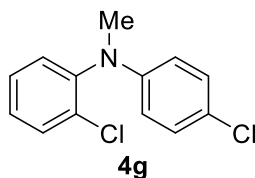

2-Chloro-*N*-(4-chlorophenyl)-*N*-methylaniline (**4g**). Yellow oil (46.2 mg, 92% yield);  $^1\text{H}$  NMR (400 MHz,  $\text{CDCl}_3$ )  $\delta$  7.46 (dd,  $J = 8.0, 1.6$  Hz, 1H), 7.30-7.17 (m, 3H), 7.13-7.07 (m, 2H), 6.51-6.45 (m, 2H), 3.20 (s, 3H);  $^{13}\text{C}$  NMR (100 MHz,  $\text{CDCl}_3$ )  $\delta$  147.3, 144.9, 133.6, 131.1, 130.2, 128.9, 128.4, 127.8, 122.7, 114.6, 39.2; IR (film,  $\nu/\text{cm}^{-1}$ ) 3061, 2945, 2889, 1591, 1488, 1340, 1247, 1050, 904, 817, 731, 679; HRMS (ESI) calcd for  $\text{C}_{13}\text{H}_{12}\text{N}^{35}\text{Cl}_2^+$  ( $\text{M} + \text{H}$ ) $^+$  252.0341, found 252.0332.

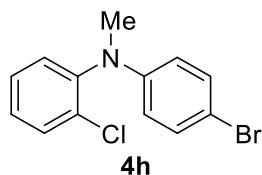

*N*-(4-Bromophenyl)-2-chloro-*N*-methylaniline (**4h**). Colorless oil (54.1 mg, 91% yield);  $^1\text{H}$  NMR (400 MHz,  $\text{CDCl}_3$ )  $\delta$  7.48 (dd,  $J = 8.0, 1.2$  Hz, 1H), 7.33-7.20 (m, 5H), 6.47-6.42 (m, 2H), 3.21 (s, 3H);  $^{13}\text{C}$  NMR (100 MHz,  $\text{CDCl}_3$ )  $\delta$  147.7, 144.8, 133.7, 131.8, 131.2, 130.2, 128.5, 127.9, 115.0, 109.9, 39.2; IR (film,  $\nu/\text{cm}^{-1}$ ) 3068, 2932, 2819, 1582, 1488, 1341, 1247, 1051, 809, 740, 679; HRMS (ESI) calcd for  $\text{C}_{13}\text{H}_{12}\text{N}^{79}\text{Br}^{35}\text{Cl}^+$  ( $\text{M} + \text{H}$ ) $^+$  295.9836, found 295.9829.

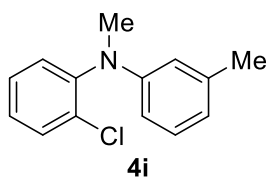

2-Chloro-*N*-methyl-*N*-(*m*-tolyl)aniline (**4i**). Yellow oil (42.7 mg, 92% yield);  $^1\text{H}$  NMR (400 MHz,  $\text{CDCl}_3$ )  $\delta$  7.49-7.45 (m, 1H), 7.30-7.24 (m, 2H), 7.21-7.16 (m, 1H), 7.07 (t,  $J = 7.6$  Hz, 1H), 6.59 (d,  $J = 7.6$  Hz, 1H), 6.44-6.38 (m, 2H), 3.22 (s, 3H), 2.26 (s, 3H);  $^{13}\text{C}$  NMR (100 MHz,  $\text{CDCl}_3$ )  $\delta$  148.7, 145.5, 138.8, 133.7, 131.0, 130.3, 128.9, 128.2, 127.4, 118.9, 114.3, 110.9, 39.1, 21.9; IR (film,  $\nu/\text{cm}^{-1}$ ) 3044, 2924, 1608, 1575, 1488, 1350, 1050, 758, 731, 689; HRMS (ESI) calcd for  $\text{C}_{14}\text{H}_{15}\text{N}^{35}\text{Cl}^+$  ( $\text{M} + \text{H}$ ) $^+$  232.0888, found 232.0887.

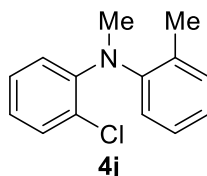

2-Chloro-*N*-methyl-*N*-(*o*-tolyl)aniline (**4j**). Yellow oil (36.0 mg, 78% yield);  $^1\text{H}$  NMR (400 MHz,  $\text{CDCl}_3$ )  $\delta$  7.34 (dd,  $J = 8.0, 1.6$  Hz, 1H), 7.18-7.09 (m, 3H), 7.03-6.97 (m, 2H), 6.97-6.92 (m, 1H), 6.90 (dd,  $J = 8.0, 1.6$  Hz, 1H), 3.15 (s, 3H), 2.01 (s, 3H);  $^{13}\text{C}$  NMR (100 MHz,  $\text{CDCl}_3$ )  $\delta$  149.1, 148.4, 133.0, 131.5, 131.0, 129.3, 127.6, 126.7, 124.2, 124.0, 123.6, 121.4, 41.1, 18.6; IR (film,  $\nu/\text{cm}^{-1}$ ) 3061, 2958, 1582, 1479, 1316, 1235, 1050, 912, 758, 731, 672; HRMS (ESI) calcd for  $\text{C}_{14}\text{H}_{15}\text{N}^{35}\text{Cl}^+$  ( $\text{M} + \text{H}$ ) $^+$  232.0888, found 232.0881.

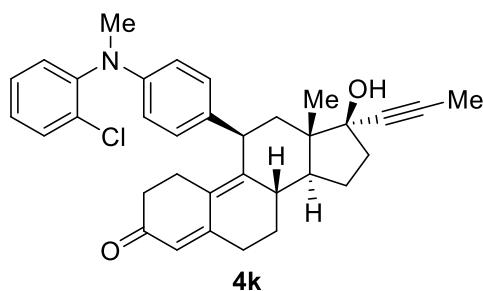

(8*S*,11*R*,13*S*,14*S*,17*S*)-11-(4-((2-Chlorophenyl)(methyl)amino)phenyl)-17-hydroxy-13-methyl-17-(prop-1-yn-1-yl)-1,2,6,7,8,11,12,13,14,15,16,17-dodecahydro-3*H*-cyclopenta[*a*]phenanthren-3-one (**4k**). Pale green oil (70.1 mg, 67% yield); <sup>1</sup>H NMR (400 MHz, CDCl<sub>3</sub>) δ 7.46-7.42 (m, 1H), 7.27-7.23 (m, 2H), 7.19-7.14 (m, 1H), 6.97 (d, *J* = 8.4 Hz, 2H), 6.52 (d, *J* = 8.4 Hz, 2H), 5.75 (s, 1H), 4.35 (br, 1H), 3.21 (s, 3H), 2.81-2.72 (m, 1H), 2.58-2.52 (m, 2H), 2.48-2.18 (m, 8H), 2.03-1.90 (m, 2H), 1.87 (s, 3H), 1.77-1.66 (m, 2H), 1.49-1.30 (m, 2H), 0.56 (s, 3H); <sup>13</sup>C NMR (100 MHz, CDCl<sub>3</sub>) δ 199.8, 157.1, 146.9, 146.5, 145.5, 133.4, 133.2, 130.9, 129.9, 129.0, 128.1, 127.3, 127.1, 122.6, 113.8, 82.4, 82.3, 80.0, 49.8, 46.8, 39.6, 39.1, 39.0, 38.8, 36.8, 31.1, 27.3, 25.8, 23.3, 13.8, 3.9; IR (film, ν/cm<sup>-1</sup>) 3422, 2941, 2880, 2245, 1651, 1505, 1488, 1341, 1238, 1041, 912, 731, 644; HRMS (ESI) calcd for C<sub>34</sub>H<sub>37</sub>O<sub>2</sub>N<sup>35</sup>Cl<sup>+</sup> (M + H)<sup>+</sup> 526.2507, found 526.2512.

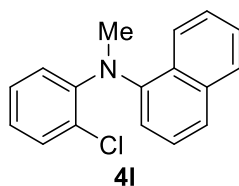

*N*-(2-Chlorophenyl)-*N*-methylnaphthalen-1-amine (**4l**). Yellow oil (48.8 mg, 91% yield); <sup>1</sup>H NMR (400 MHz, CDCl<sub>3</sub>) δ 7.98 (d, *J* = 8.0 Hz, 1H), 7.78 (d, *J* = 8.0 Hz, 1H), 7.57 (d, *J* = 8.4 Hz, 1H), 7.42-7.32 (m, 4H), 7.10-7.04 (m, 2H), 6.96-6.91 (m, 2H), 3.29 (s, 3H); <sup>13</sup>C NMR (100 MHz, CDCl<sub>3</sub>) δ 149.1, 147.3, 135.0, 131.1, 129.3, 129.0, 128.3, 127.6, 125.9, 125.8, 125.7, 124.5, 124.3, 124.1, 123.8, 118.5, 42.0; IR (film, ν/cm<sup>-1</sup>) 3052, 2958, 1565, 1480, 1393, 1308, 1101, 1041, 908, 771, 721; HRMS (ESI) calcd for C<sub>17</sub>H<sub>15</sub>N<sup>35</sup>Cl<sup>+</sup> (M + H)<sup>+</sup> 268.0888, found 268.0893.

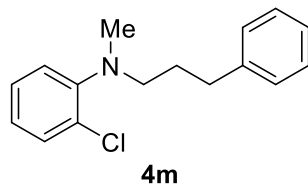

2-Chloro-*N*-methyl-*N*-(3-phenylpropyl)aniline (**4m**). Colorless oil (26.8 mg, 52% yield); <sup>1</sup>H NMR (400 MHz, CDCl<sub>3</sub>) δ 7.35 (dd, *J* = 8.0, 1.6 Hz, 1H), 7.29-7.24 (m, 2H), 7.21-7.14 (m, 4H), 7.04 (dd, *J* = 8.0, 1.6 Hz, 1H), 6.96-6.91 (m, 1H), 3.07-3.01 (m, 2H), 2.77 (s, 3H), 2.67-2.61 (m, 2H), 1.93-1.84 (m, 2H); <sup>13</sup>C NMR (100 MHz, CDCl<sub>3</sub>) δ 149.9, 142.2, 130.8, 129.2, 128.5, 128.4, 127.4, 125.9, 123.4, 121.5, 55.1, 41.2, 33.3, 29.1; IR (film, ν/cm<sup>-1</sup>) 3061, 3018, 2932, 2855, 2803, 1591, 1479, 1452, 1290, 1041, 953, 749, 697; HRMS (ESI) calcd for C<sub>16</sub>H<sub>19</sub>N<sup>35</sup>Cl<sup>+</sup> (M + H)<sup>+</sup> 260.1201, found 260.1193.

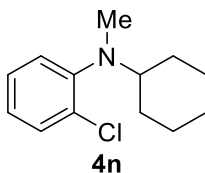

2-Chloro-*N*-cyclohexyl-*N*-methylaniline (**4n**). Yellow oil (34.8 mg, 78% yield); <sup>1</sup>H NMR (400 MHz, CDCl<sub>3</sub>) δ 7.34 (dd, *J* = 8.0, 1.6 Hz, 1H), 7.17 (ddd, *J* = 8.0, 7.2, 1.6 Hz, 1H), 7.06 (dd, *J* = 8.0, 1.6 Hz, 1H), 6.93-6.88 (m, 1H), 3.14 (tt, *J* = 11.6, 3.2 Hz, 1H), 2.70 (s, 3H), 1.83-1.73 (m, 4H),

1.65-1.57 (m, 1H), 1.51-1.38 (m, 2H), 1.30-1.17 (m, 2H), 1.15-1.05 (m, 1H);  $^{13}\text{C}$  NMR (100 MHz,  $\text{CDCl}_3$ )  $\delta$  150.0, 130.7, 129.4, 127.0, 123.0, 122.8, 61.6, 33.8, 29.2, 26.2, 26.1; IR (film,  $\nu/\text{cm}^{-1}$ ) 3069, 2925, 2853, 2794, 1592, 1481, 1454, 1299, 1101, 1050, 947, 759, 679; HRMS (ESI) calcd for  $\text{C}_{13}\text{H}_{19}\text{N}^{35}\text{Cl}^+$  ( $\text{M} + \text{H}$ ) $^+$  224.1201, found 224.1204.

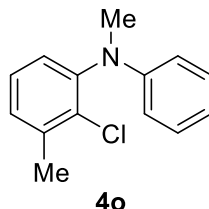

2-Chloro-*N*,3-dimethyl-*N*-phenylaniline (**4o**). Colorless oil (42.2 mg, 91% yield);  $^1\text{H}$  NMR (400 MHz,  $\text{CDCl}_3$ )  $\delta$  7.21-7.15 (m, 4H), 7.14-7.09 (m, 1H), 6.74 (t,  $J = 7.2$  Hz, 1H), 6.57 (d,  $J = 8.0$  Hz, 2H), 3.22 (s, 3H), 2.42 (s, 3H);  $^{13}\text{C}$  NMR (100 MHz,  $\text{CDCl}_3$ )  $\delta$  148.8, 145.5, 138.5, 134.2, 129.0, 128.9, 127.8, 127.4, 117.6, 113.2, 39.0, 20.9; IR (film,  $\nu/\text{cm}^{-1}$ ) 3061, 3031, 2924, 2811, 1599, 1572, 1496, 1341, 1273, 1050, 933, 741, 687; HRMS (ESI) calcd for  $\text{C}_{14}\text{H}_{15}\text{N}^{35}\text{Cl}^+$  ( $\text{M} + \text{H}$ ) $^+$  232.0888, found 232.0890.

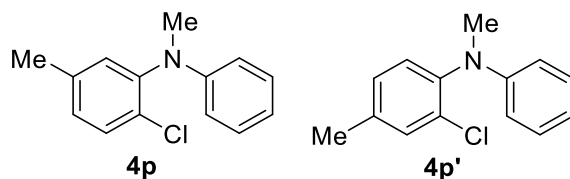

A 55:45 mixture of 2-chloro-*N*,5-dimethyl-*N*-phenylaniline (**4p**) and 2-chloro-*N*,4-dimethyl-*N*-phenylaniline (**4p'**) was obtained as a colorless oil (41.8 mg, 90% yield). Compound **4p** was distinguished from its regioisomer **4p'** by comparing the NMR proton-proton coupling constant for the proton next to the chlorine on the benzene ring.  $^1\text{H}$  NMR (400 MHz,  $\text{CDCl}_3$ ) for amine **4p**:  $\delta$  7.35 (d,  $J = 8.4$  Hz, 1H), 7.22-7.13 (m, 2H), 7.11-7.06 (m, 1H), 7.01 (dd,  $J = 8.0, 1.6$  Hz, 1H), 6.78-6.71 (m, 1H), 6.59 (t,  $J = 8.0$  Hz, 2H), 3.23 (s, 3H), 2.30 (s, 3H);  $^1\text{H}$  NMR (400 MHz,  $\text{CDCl}_3$ ) for amine **4p'**:  $\delta$  7.30 (s, 1H), 7.22-7.13 (m, 3H), 7.11-7.06 (m, 1H), 6.78-6.71 (m, 1H), 6.59 (t,  $J = 8.0$  Hz, 2H), 3.22 (s, 3H), 2.35 (s, 3H);  $^{13}\text{C}$  NMR (100 MHz,  $\text{CDCl}_3$ )  $\delta$  148.9, 148.8, 145.0, 142.7, 138.4, 137.8, 133.4, 131.4, 130.7, 130.6, 130.5, 130.0, 129.1, 129.0, 128.3, 117.7, 117.6, 113.5, 113.3, 39.1, 39.0, 20.9; IR (film,  $\nu/\text{cm}^{-1}$ ) 3037, 2924, 2810, 1591, 1496, 1340, 1135, 1048, 806, 740, 689; HRMS (ESI) calcd for  $\text{C}_{14}\text{H}_{15}\text{N}^{35}\text{Cl}^+$  ( $\text{M} + \text{H}$ ) $^+$  232.0888, found 232.0885.

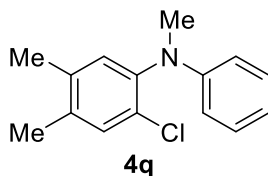

2-Chloro-*N*,4,5-trimethyl-*N*-phenylaniline (**4q**). Pale yellow oil (44.3 mg, 90% yield);  $^1\text{H}$  NMR (400 MHz,  $\text{CDCl}_3$ )  $\delta$  7.22 (s, 1H), 7.18-7.12 (m, 2H), 7.01 (s, 1H), 6.71 (t,  $J = 7.2$  Hz, 1H), 6.59-6.54 (m, 2H), 3.18 (s, 3H), 2.21 (s, 3H), 2.16 (s, 3H);  $^{13}\text{C}$  NMR (100 MHz,  $\text{CDCl}_3$ )  $\delta$  148.9, 142.6, 136.9, 136.4, 131.5, 131.1, 130.3, 129.0, 117.4, 113.2, 39.0, 19.3, 19.2; IR (film,  $\nu/\text{cm}^{-1}$ ) 3035, 2932, 2882,

2820, 1599, 1496, 1452, 1340, 1134, 981, 912, 731, 689, 637; HRMS (ESI) calcd for  $C_{15}H_{17}N^{35}Cl^+$  ( $M + H$ )<sup>+</sup> 246.1044, found 246.1046.

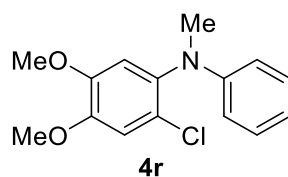

2-Chloro-4,5-dimethoxy-*N*-methyl-*N*-phenylaniline (**4r**). Colorless oil (31.5 mg, 57% yield); <sup>1</sup>H NMR (400 MHz, CDCl<sub>3</sub>) δ 7.23-7.17 (m, 2H), 6.96 (s, 1H), 6.78-6.72 (m, 2H), 6.57 (d, *J* = 8.0 Hz, 2H), 3.90 (s, 3H), 3.81 (s, 3H), 3.23 (s, 3H); <sup>13</sup>C NMR (100 MHz, CDCl<sub>3</sub>) δ 148.8, 148.1, 137.5, 129.1, 124.9, 117.4, 113.0, 112.8, 112.7, 56.4, 56.3, 38.9; IR (film, ν/cm<sup>-1</sup>) 3011, 2934, 2855, 1599, 1496, 1447, 1211, 1178, 1032, 844, 723, 693; HRMS (ESI) calcd for  $C_{15}H_{17}O_2N^{35}Cl^+$  ( $M + H$ )<sup>+</sup> 278.0942, found 278.0945.

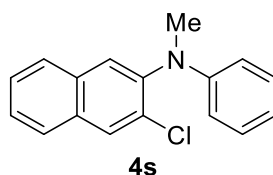

3-Chloro-*N*-methyl-*N*-phenylnaphthalen-2-amine (**4s**). Pale yellow oil (45.5 mg, 85% yield); <sup>1</sup>H NMR (400 MHz, CDCl<sub>3</sub>) δ 7.98 (s, 1H), 7.78-7.71 (m, 3H), 7.51-7.43 (m, 2H), 7.22-7.17 (m, 2H), 6.78 (t, *J* = 7.2 Hz, 1H), 6.65 (dd, *J* = 8.8, 0.8 Hz, 2H), 3.33 (s, 3H); <sup>13</sup>C NMR (100 MHz, CDCl<sub>3</sub>) δ 149.2, 143.3, 133.1, 132.4, 132.3, 129.4, 129.1, 128.3, 127.5, 126.9, 126.8, 126.5, 118.1, 114.0, 39.8; IR (film, ν/cm<sup>-1</sup>) 3052, 2924, 2811, 1591, 1496, 1454, 1356, 1127, 1006, 876, 741, 689, 609; HRMS (ESI) calcd for  $C_{17}H_{15}N^{35}Cl^+$  ( $M + H$ )<sup>+</sup> 268.0888, found 268.0889.

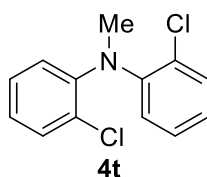

2-Chloro-*N*-(2-chlorophenyl)-*N*-methylaniline (**4t**). Yellow oil (32.9 mg, 87% yield); <sup>1</sup>H NMR (400 MHz, CDCl<sub>3</sub>) δ 7.36 (dd, *J* = 8.0, 1.6 Hz, 2H), 7.20 (td, *J* = 8.0, 1.6 Hz, 2H), 7.05-6.98 (m, 4H), 3.23 (s, 3H); <sup>13</sup>C NMR (100 MHz, CDCl<sub>3</sub>) δ 147.4, 131.1, 129.5, 127.6, 124.5, 123.5, 41.0; IR (film, ν/cm<sup>-1</sup>) 3069, 2966, 2924, 2855, 1591, 1471, 1316, 1238, 1084, 1050, 904, 758, 733; HRMS (ESI) calcd for  $C_{13}H_{12}N^{35}Cl_2^+$  ( $M + H$ )<sup>+</sup> 252.0341, found 252.0344.

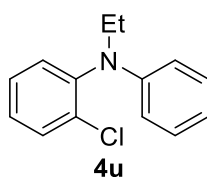



2-Chloro-*N*-ethyl-*N*-phenylaniline (**4u**). Colorless oil (43.0 mg, 93% yield);  $^1\text{H}$  NMR (400 MHz,  $\text{CDCl}_3$ )  $\delta$  7.48 (dd,  $J = 8.0, 0.8$  Hz, 1H), 7.31-7.13 (m, 5H), 6.72 (td,  $J = 7.2, 0.8$  Hz, 1H), 6.56 (dd,  $J = 8.0, 0.8$  Hz, 2H), 3.68 (q,  $J = 7.2$  Hz, 2H), 1.21 (t,  $J = 7.2$  Hz, 3H);  $^{13}\text{C}$  NMR (100 MHz,  $\text{CDCl}_3$ )  $\delta$  147.7, 143.7, 134.5, 131.8, 131.1, 129.1, 128.2, 127.6, 117.5, 113.5, 45.5, 12.8; IR (film,  $\nu/\text{cm}^{-1}$ ) 3061, 2975, 1599, 1496, 1368, 1264, 1050, 749, 689; HRMS (ESI) calcd for  $\text{C}_{14}\text{H}_{15}\text{N}^{35}\text{Cl}^+$  ( $\text{M} + \text{H}$ ) $^+$  232.0888, found 232.0888.

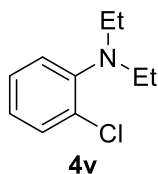

2-Chloro-*N,N*-diethylaniline (**4v**). Colorless oil (30.2 mg, 82% yield);  $^1\text{H}$  NMR (400 MHz,  $\text{CDCl}_3$ )  $\delta$  7.36 (dd,  $J = 8.0, 1.6$  Hz, 1H), 7.19 (ddd,  $J = 8.0, 7.2, 1.6$  Hz, 1H), 7.08 (dd,  $J = 8.0, 1.6$  Hz, 1H), 6.96 (ddd,  $J = 8.0, 7.2, 1.6$  Hz, 1H), 3.13 (q,  $J = 7.2$  Hz, 4H), 1.03 (t,  $J = 7.2$  Hz, 6H);  $^{13}\text{C}$  NMR (100 MHz,  $\text{CDCl}_3$ )  $\delta$  147.7, 131.0, 130.7, 127.0, 123.8, 123.7, 46.8, 12.3; IR (film,  $\nu/\text{cm}^{-1}$ ) 3061, 2968, 2924, 2855, 1592, 1479, 1462, 1375, 1256, 1050, 799, 759, 672; HRMS (ESI) calcd for  $\text{C}_{10}\text{H}_{15}\text{N}^{35}\text{Cl}^+$  ( $\text{M} + \text{H}$ ) $^+$  184.0888, found 184.0890.

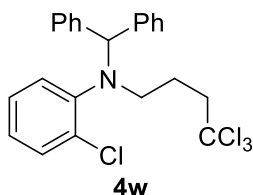

*N*-Benzhydryl-2-chloro-*N*-(4,4,4-trichlorobutyl)aniline (**4w**). Colorless oil (58.4 mg, 65% yield);  $^1\text{H}$  NMR (400 MHz,  $\text{CDCl}_3$ )  $\delta$  7.40-7.36 (m, 5H), 7.30-7.25 (m, 4H), 7.23-7.18 (m, 2H), 7.04 (td,  $J = 7.6, 1.6$  Hz, 1H), 6.96 (td,  $J = 7.6, 1.6$  Hz, 1H), 6.82 (dd,  $J = 8.0, 1.6$  Hz, 1H), 5.52 (s, 1H), 3.03 (t,  $J = 7.2$  Hz, 2H), 2.65-2.58 (m, 2H), 1.86-1.77 (m, 2H);  $^{13}\text{C}$  NMR (100 MHz,  $\text{CDCl}_3$ )  $\delta$  145.7, 140.5, 132.6, 130.7, 128.7, 128.3, 127.3, 126.8, 126.7, 125.3, 100.0, 71.2, 52.9, 47.5, 23.5; IR (film,  $\nu/\text{cm}^{-1}$ ) 3354, 3069, 3035, 2932, 2856, 1591, 1479, 1444, 1256, 1050, 904, 741, 697, 623; HRMS (ESI) calcd for  $\text{C}_{23}\text{H}_{22}\text{N}^{35}\text{Cl}_4^+$  ( $\text{M} + \text{H}$ ) $^+$  452.0501, found 452.0497.

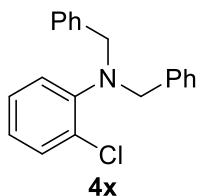

*N,N*-Dibenzyl-2-chloroaniline (**4x**). Colorless oil (50.7 mg, 82% yield);  $^1\text{H}$  NMR (400 MHz,  $\text{CDCl}_3$ )  $\delta$  7.37 (dd,  $J = 8.0, 1.6$  Hz, 1H), 7.33-7.29 (m, 4H), 7.28-7.23 (m, 4H), 7.21-7.16 (m, 2H), 7.06-7.00 (m, 1H), 6.92-6.87 (m, 2H), 4.19 (s, 4H);  $^{13}\text{C}$  NMR (100 MHz,  $\text{CDCl}_3$ )  $\delta$  147.6, 138.2, 130.7, 130.2, 128.6, 128.3, 127.1, 127.0, 124.0, 123.9, 56.2; IR (film,  $\nu/\text{cm}^{-1}$ ) 3065, 3025, 2931, 2846, 2806, 1591, 1479, 1455, 1368, 1204, 1032, 911, 733, 697; HRMS (ESI) calcd for  $\text{C}_{20}\text{H}_{19}\text{N}^{35}\text{Cl}^+$  ( $\text{M} + \text{H}$ ) $^+$  308.1201, found 308.1201.

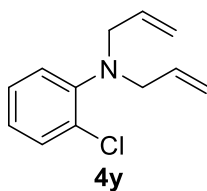

*N,N*-Diallyl-2-chloroaniline (**4y**). Colorless oil (31.6 mg, 76% yield);  $^1\text{H}$  NMR (400 MHz,  $\text{CDCl}_3$ )  $\delta$  7.35 (dd,  $J = 8.0, 1.6$  Hz, 1H), 7.19-7.13 (m, 1H), 7.03 (dd,  $J = 8.0, 1.6$  Hz, 1H), 6.94 (td,  $J = 7.6, 1.6$  Hz, 1H), 5.81 (ddt,  $J = 16.4, 10.0, 6.0$  Hz, 2H), 5.22-5.10 (m, 4H), 3.72 (d,  $J = 6.0$  Hz, 4H);  $^{13}\text{C}$  NMR (100 MHz,  $\text{CDCl}_3$ )  $\delta$  147.8, 134.9, 130.8, 129.7, 126.9, 123.6, 123.5, 117.7, 55.0; IR (film,  $\text{v}_{\text{cm}^{-1}}$ ) 3087, 2982, 2932, 2829, 1643, 1591, 1479, 1445, 1419, 1213, 1038, 995, 921, 756, 725, 686; HRMS (ESI) calcd for  $\text{C}_{12}\text{H}_{15}\text{N}^{35}\text{Cl}^+$  ( $\text{M} + \text{H}$ ) $^+$  208.0888, found 208.0891.

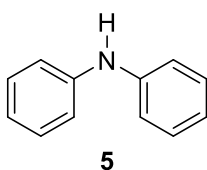

Diphenylamine (**5**). Pale yellow solid (27.8 mg, 82% yield); m.p. 49-50 °C;  $^1\text{H}$  NMR (400 MHz,  $\text{CDCl}_3$ )  $\delta$  7.29-7.23 (m, 4H), 7.06 (dd,  $J = 8.4, 0.8$  Hz, 4H), 6.92 (t,  $J = 7.2$  Hz, 2H), 5.68 (br, 1H).  $^{13}\text{C}$  NMR (100 MHz,  $\text{CDCl}_3$ )  $\delta$  143.2, 129.5, 121.1, 117.9. This result is consistent with previous literature.<sup>4</sup>

### Reaction of various organohalides (Scheme 5)

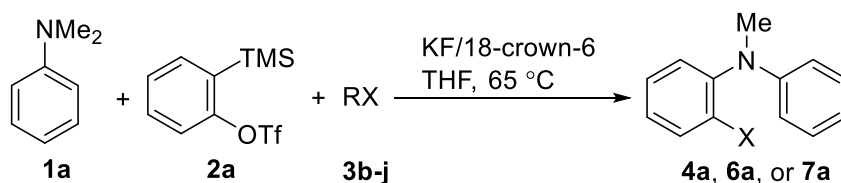

Sealed reaction tubes containing dry KF (34.9 mg, 0.60 mmol) and 18-crown-6 (159 mg, 0.60 mmol) were sequentially added tetrahydrofuran (0.20 mL), organohalide **3b-j** (0.60 mmol), amine **1a** (24.2 mg, 0.20 mmol), and 2-(trimethylsilyl)phenyl triflate (**2a**) (89.5 mg, 0.30 mmol). The mixture was stirred at 65 °C for 10 h, cooled to room temperature, and purified directly by silica gel chromatography with the mixture eluent of ethyl acetate and petroleum ether (1:40 to 0:1 v/v), to give compound **4a**, **6a**, or **7a**.

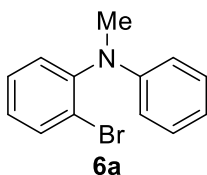

2-Bromo-*N*-methyl-*N*-phenylaniline (**6a**). Colorless oil (43.4 mg, 83% yield);  $^1\text{H}$  NMR (400 MHz,  $\text{CDCl}_3$ )  $\delta$  7.66 (dd,  $J = 8.0, 1.6$  Hz, 1H), 7.31 (td,  $J = 7.6, 1.6$  Hz, 1H), 7.24 (dd,  $J = 8.0, 1.6$  Hz, 1H), 7.21-7.15 (m, 2H), 7.11 (td,  $J = 8.0, 1.6$  Hz, 1H), 6.75 (t,  $J = 7.2$  Hz, 1H), 6.57 (d,  $J = 8.8$

Hz, 2H), 3.21 (s, 3H);  $^{13}\text{C}$  NMR (100 MHz,  $\text{CDCl}_3$ )  $\delta$  148.6, 147.0, 134.2, 130.5, 129.0, 127.9, 124.4, 117.8, 113.5, 39.1; IR (film,  $\nu/\text{cm}^{-1}$ ) 3061, 2906, 2811, 1599, 1582, 1496, 1341, 1032, 912, 723, 686, 651; HRMS (ESI) calcd for  $\text{C}_{13}\text{H}_{13}\text{N}^{79}\text{Br}^+$  ( $\text{M} + \text{H}$ ) $^+$  262.0226, found 262.0226. This result is consistent with previous literature.<sup>5</sup>

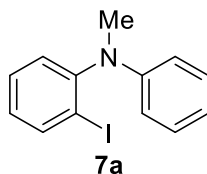

2-Iodo-*N*-methyl-*N*-phenylaniline (**7a**). Colorless oil (34.9 mg, 57% yield);  $^1\text{H}$  NMR (400 MHz,  $\text{CDCl}_3$ )  $\delta$  7.50-7.44 (m, 2H), 7.32-7.26 (m, 2H), 7.08-7.00 (m, 3H), 6.72-6.66 (m, 2H), 3.26 (s, 3H);  $^{13}\text{C}$  NMR (100 MHz,  $\text{CDCl}_3$ )  $\delta$  148.8, 148.4, 137.9, 129.5, 123.0, 122.6, 120.6, 82.1, 40.3; IR (film,  $\nu/\text{cm}^{-1}$ ) 3042, 2924, 2811, 1575, 1480, 1341, 1256, 1129, 1066, 903, 809, 731, 797; HRMS (ESI) calcd for  $\text{C}_{13}\text{H}_{13}\text{NI}^+$  ( $\text{M} + \text{H}$ ) $^+$  310.0087, found 310.0089.

### Control experiments

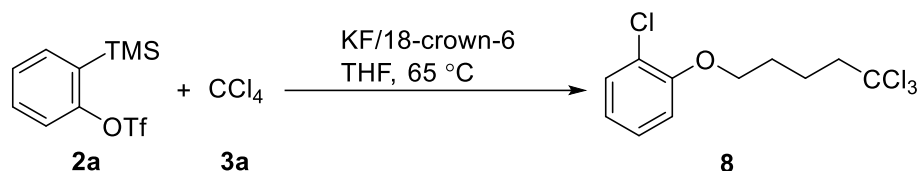

Sealed reaction tube containing dry KF (34.9 mg, 0.60 mmol) and 18-crown-6 (159 mg, 0.60 mmol) were sequentially added tetrahydrofuran (0.20 mL), carbon tetrachloride (**3a**) (0.10 mL), and 2-(trimethylsilyloxy)phenyl triflate (**2a**) (89.5 mg, 0.30 mmol). The mixture was stirred at 65 °C for 10 h, cooled to room temperature, and purified directly by silica gel chromatography with the mixture eluent of ethyl acetate and petroleum ether (1:20 v/v), to give 1-chloro-2-((5,5,5-trichloropentyl)oxy)benzene (**8**) as a colorless oil (33.7 mg, 56% yield).  $^1\text{H}$  NMR (400 MHz,  $\text{CDCl}_3$ )  $\delta$  7.35 (dd,  $J = 8.0, 1.6$  Hz, 1H), 7.19 (ddd,  $J = 8.4, 7.6, 1.6$  Hz, 1H), 6.92-6.85 (m, 2H), 4.05 (t,  $J = 6.0$  Hz, 2H), 2.83-2.78 (m, 2H), 2.06-1.89 (m, 4H);  $^{13}\text{C}$  NMR (100 MHz,  $\text{CDCl}_3$ )  $\delta$  154.4, 130.4, 127.8, 123.1, 121.6, 113.5, 100.0, 68.6, 54.9, 28.0, 23.5; IR (film,  $\nu/\text{cm}^{-1}$ ) 3069, 2941, 2879, 1591, 1478, 1282, 1247, 1067, 912, 778, 731, 697; HRMS (EI) calcd for  $\text{C}_{11}\text{H}_{12}\text{O}^{35}\text{Cl}_4^+$  ( $\text{M}^+$ ) 299.9637, found 299.9636.

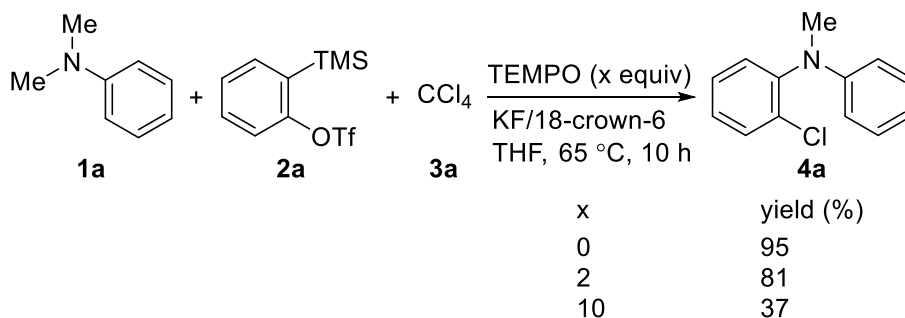

Sealed reaction tube containing dry KF (34.9 mg, 0.60 mmol), 18-crown-6 (159 mg, 0.60 mmol), and TEMPO (62.4 mg, 0.40 mmol) were sequentially added tetrahydrofuran (0.20 mL), carbon

tetrachloride (**3a**) (0.10 mL), amine **1a** (24.2 mg, 0.20 mmol), and 2-(trimethylsilyl)phenyl triflate (**2a**) (89.5 mg, 0.30 mmol). The mixture was stirred at 65 °C for 10 h, cooled to room temperature, and purified directly by silica gel chromatography with the mixture eluent of ethyl acetate and petroleum ether (1:40 v/v), to give compound **4a** (35.3 mg, 81% yield) as a yellow oil.

Instead, addition of 10 equiv. of TEMPO gave compound **4a** (16.1 mg, 37% yield).

## References

- 1 B. Sukanta, *Synth. Commun.*, 2000, **30**, 2001-2008.
- 2 L. Zhang, C. Peng, D. Zhao, Y. Wang, H.-J. Fu, Q. Shen and J.-X. Li, *Chem. Commun.*, 2012, **48**, 5928-5930.
- 3 N.-H. Nguyen, N. Bogliotti, R. Chennoufi, E. Henry, P. Tauc, E. Salas, L. J. Roman, A. Slama-Schwok, E. Deprez and J. Xie, *Org. Biomol. Chem.*, 2016, **14**, 9519-9532.
- 4 D. Guo, H. Huang, J. Xu and H. Jiang, *Org. Lett.*, 2008, **10**, 4513-4516.
- 5 T. L. Andrew and T. M. Swager, *J. Org. Chem.*, 2011, **76**, 2976-2993.

7.475  
7.456  
7.289  
7.272  
7.269  
7.266  
7.258  
7.256  
7.247  
7.200  
7.191  
7.180  
7.170  
7.166  
7.160  
6.773  
6.755  
6.737  
6.605  
6.585

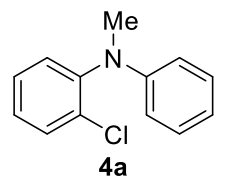

<sup>1</sup>H NMR (400 MHz, CDCl<sub>3</sub>)

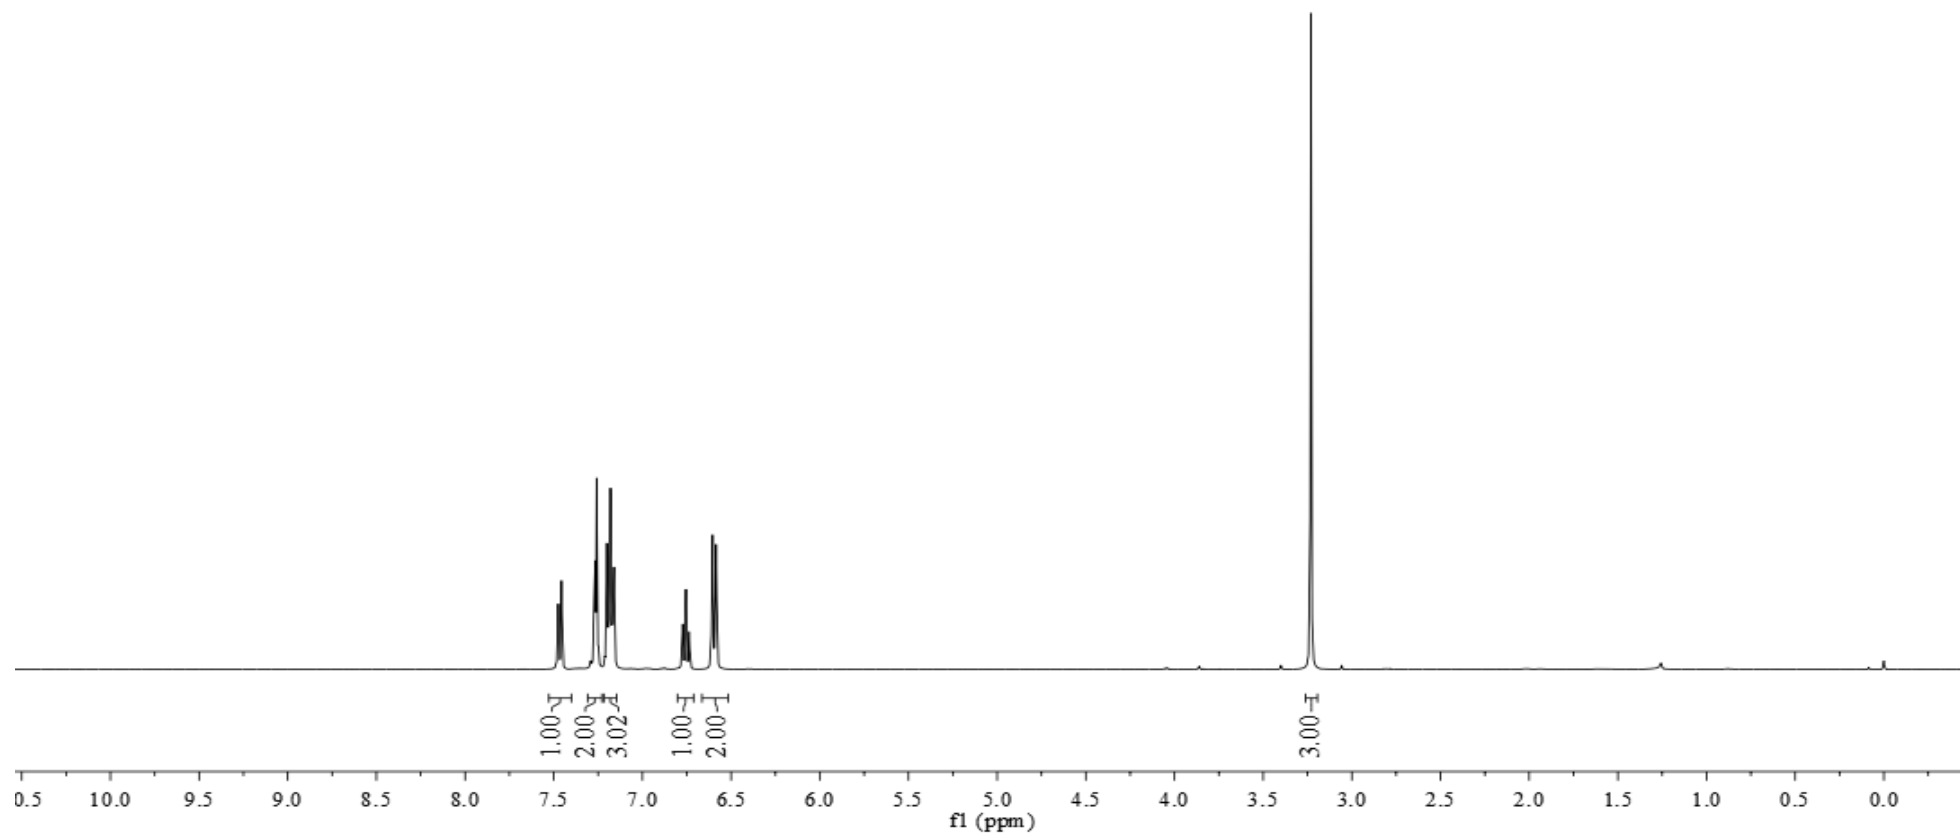

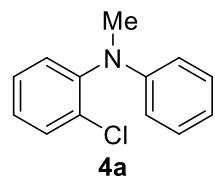

$^{13}\text{C}$  NMR (100 MHz,  $\text{CDCl}_3$ )

148.678  
145.436  
133.690  
131.049  
130.270  
129.054  
128.284  
127.435  
117.923  
113.602

77.478  
77.160  
76.843

39.064

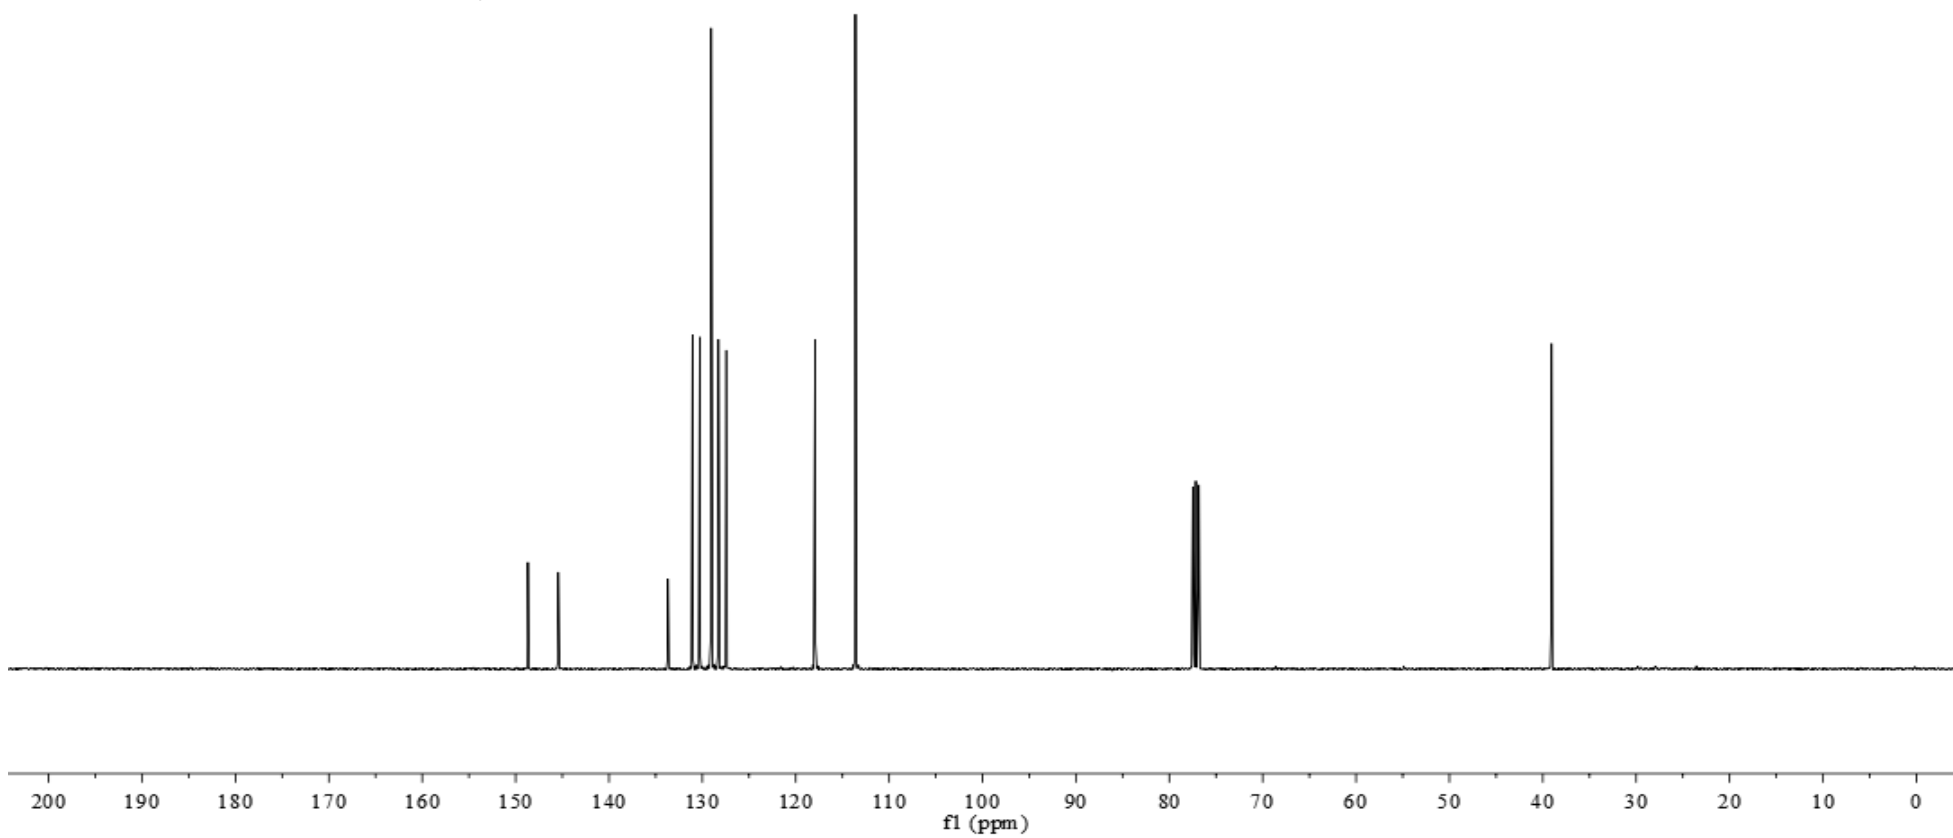

7.453  
7.451  
7.450  
7.448  
7.433  
7.431  
7.428  
7.267  
7.263  
7.247  
7.243  
7.240  
7.238  
7.232  
7.230  
7.220  
7.162  
7.161  
7.154  
7.148  
7.142  
7.140  
7.134  
7.129  
7.120  
6.999  
6.997  
6.978  
6.977  
6.976

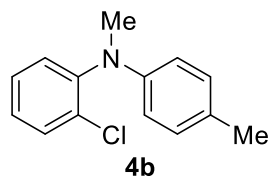

<sup>1</sup>H NMR (400 MHz, CDCl<sub>3</sub>)

—3.208

—2.238

—0.000

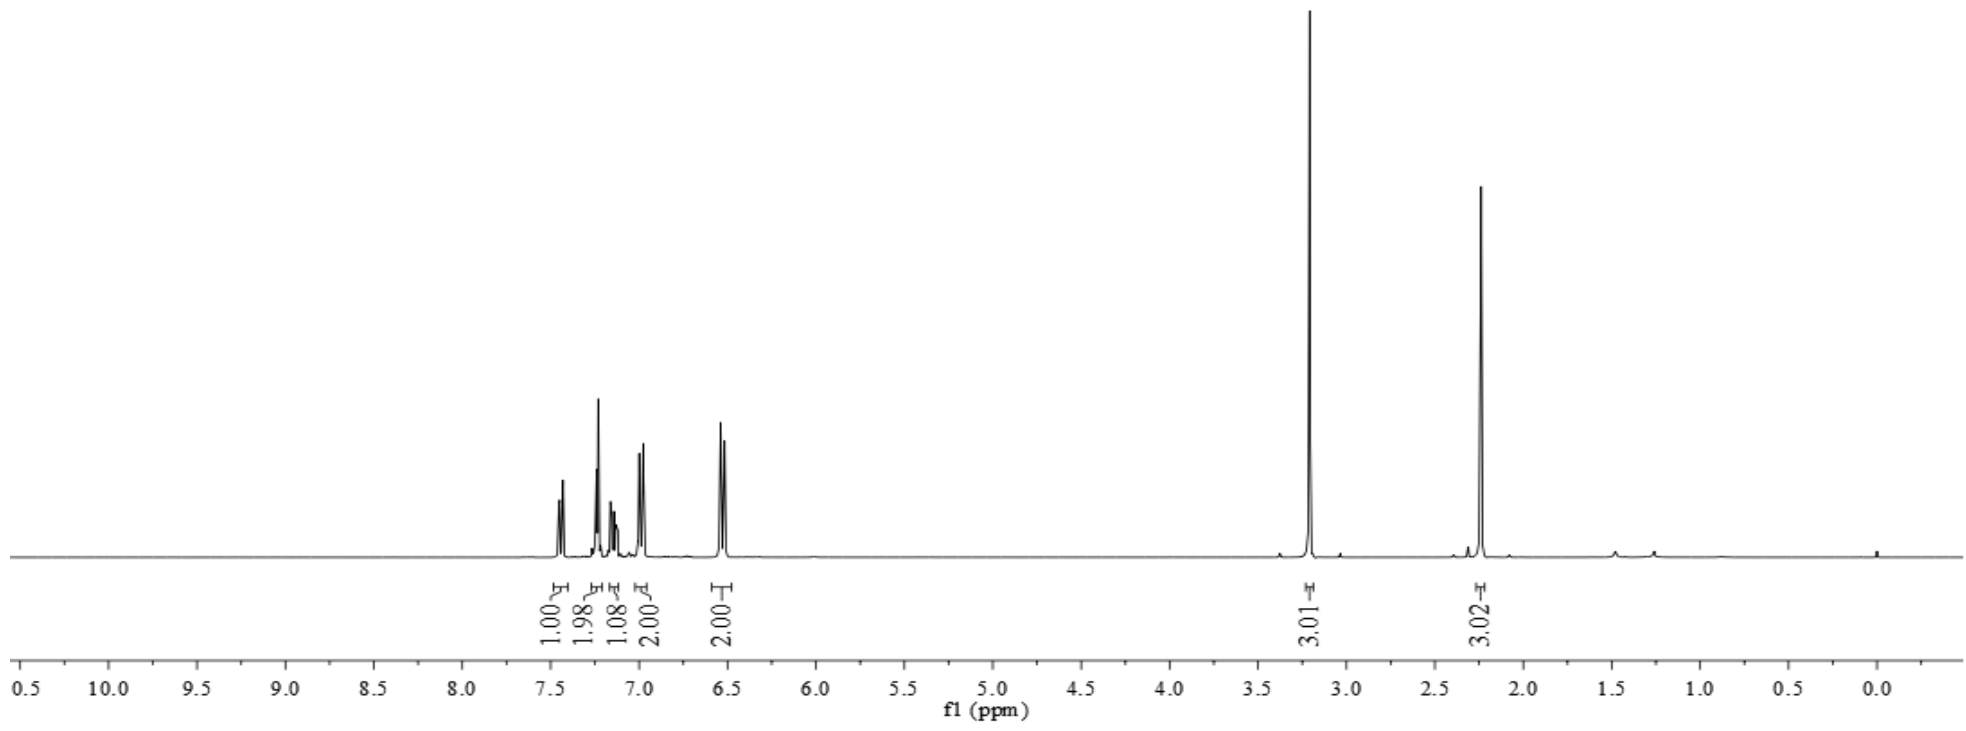

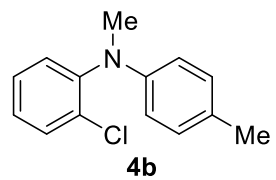

$^{13}\text{C}$  NMR (100 MHz,  $\text{CDCl}_3$ )

146.595  
145.853  
133.398  
130.977  
129.820  
129.590  
128.183  
127.265  
127.027  
—114.071

77.478  
77.160  
76.842

—39.286

—20.475

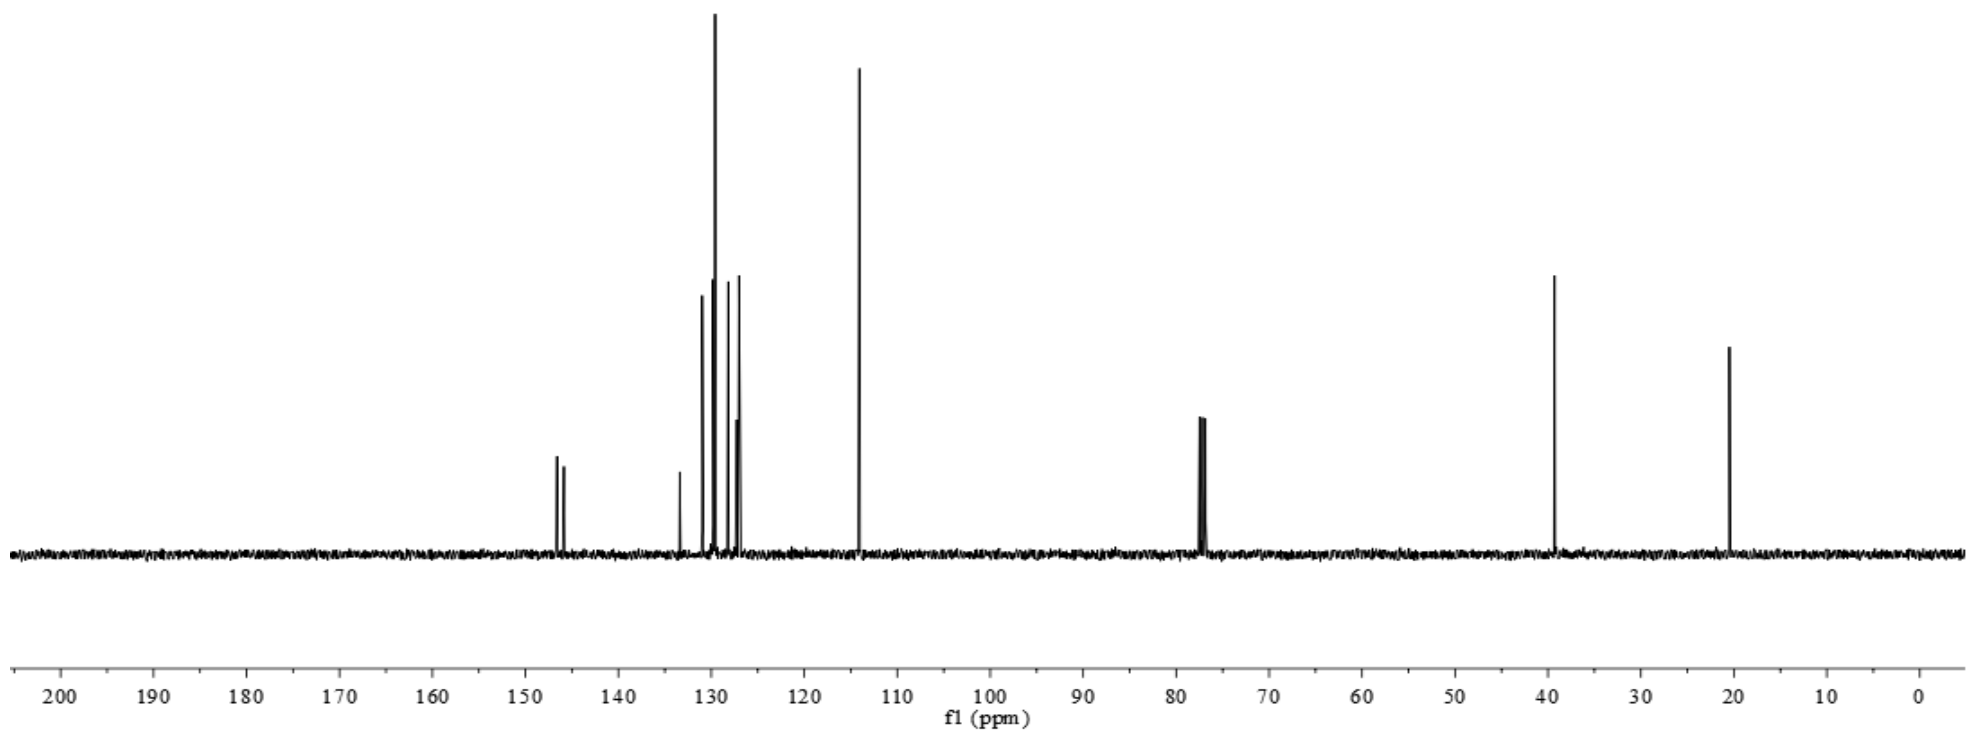



7.540  
7.536  
7.520  
7.516  
7.434  
7.411  
7.370  
7.366  
7.351  
7.347  
7.335  
7.330  
7.316  
7.311  
7.296  
7.292  
7.286  
7.282  
7.268  
7.263  
6.530  
6.508

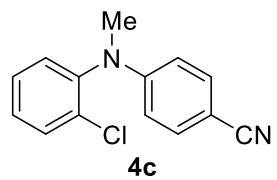

<sup>1</sup>H NMR (400 MHz, CDCl<sub>3</sub>)

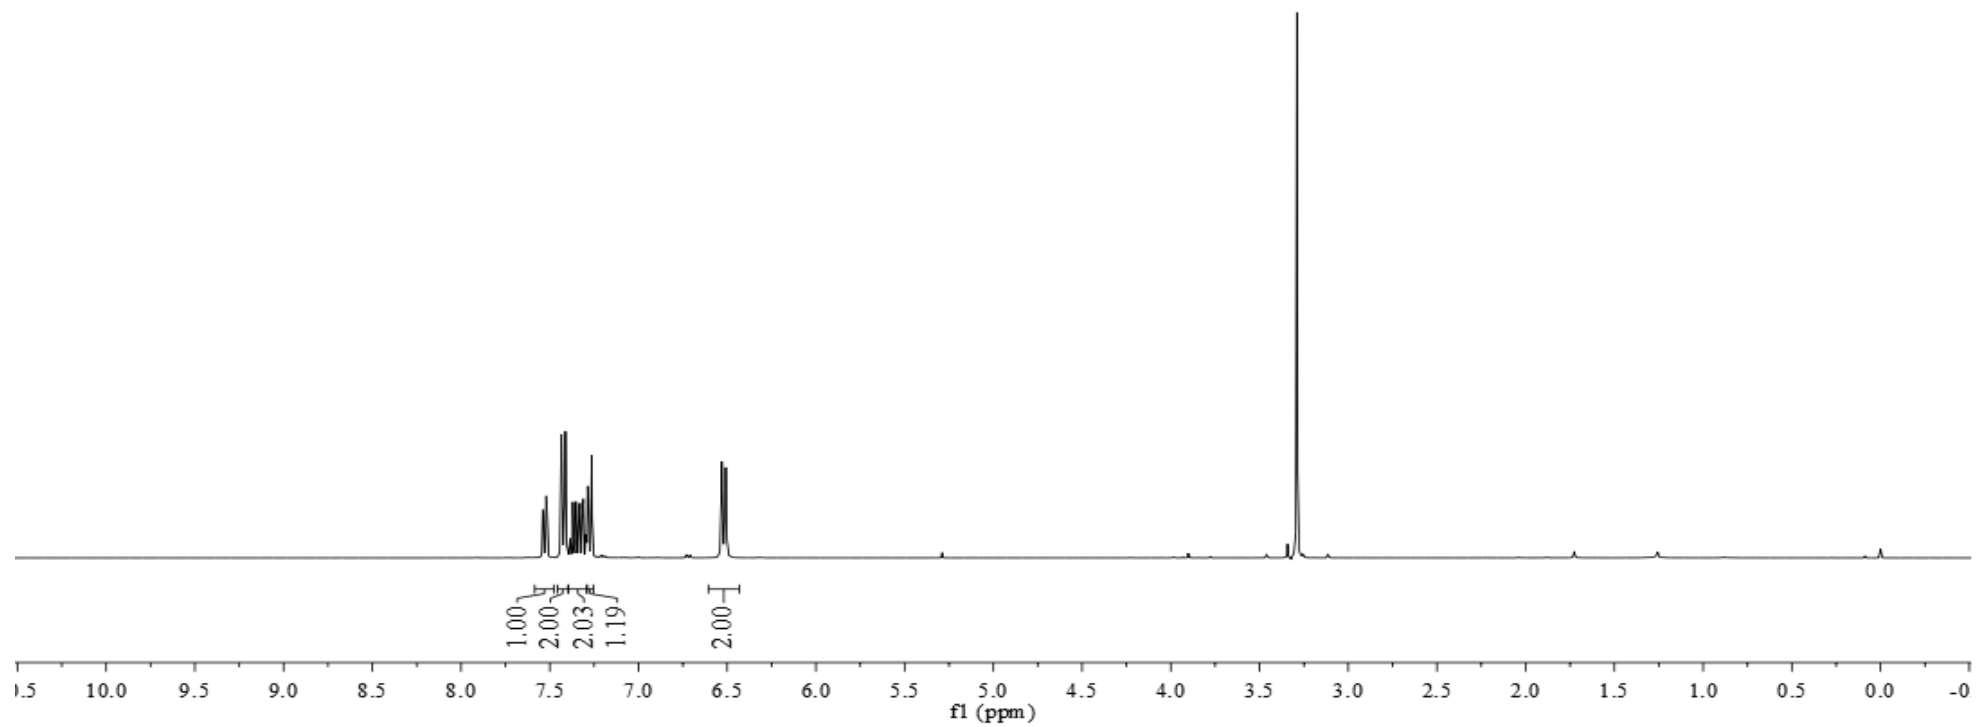

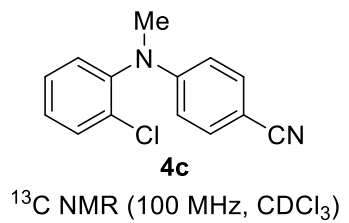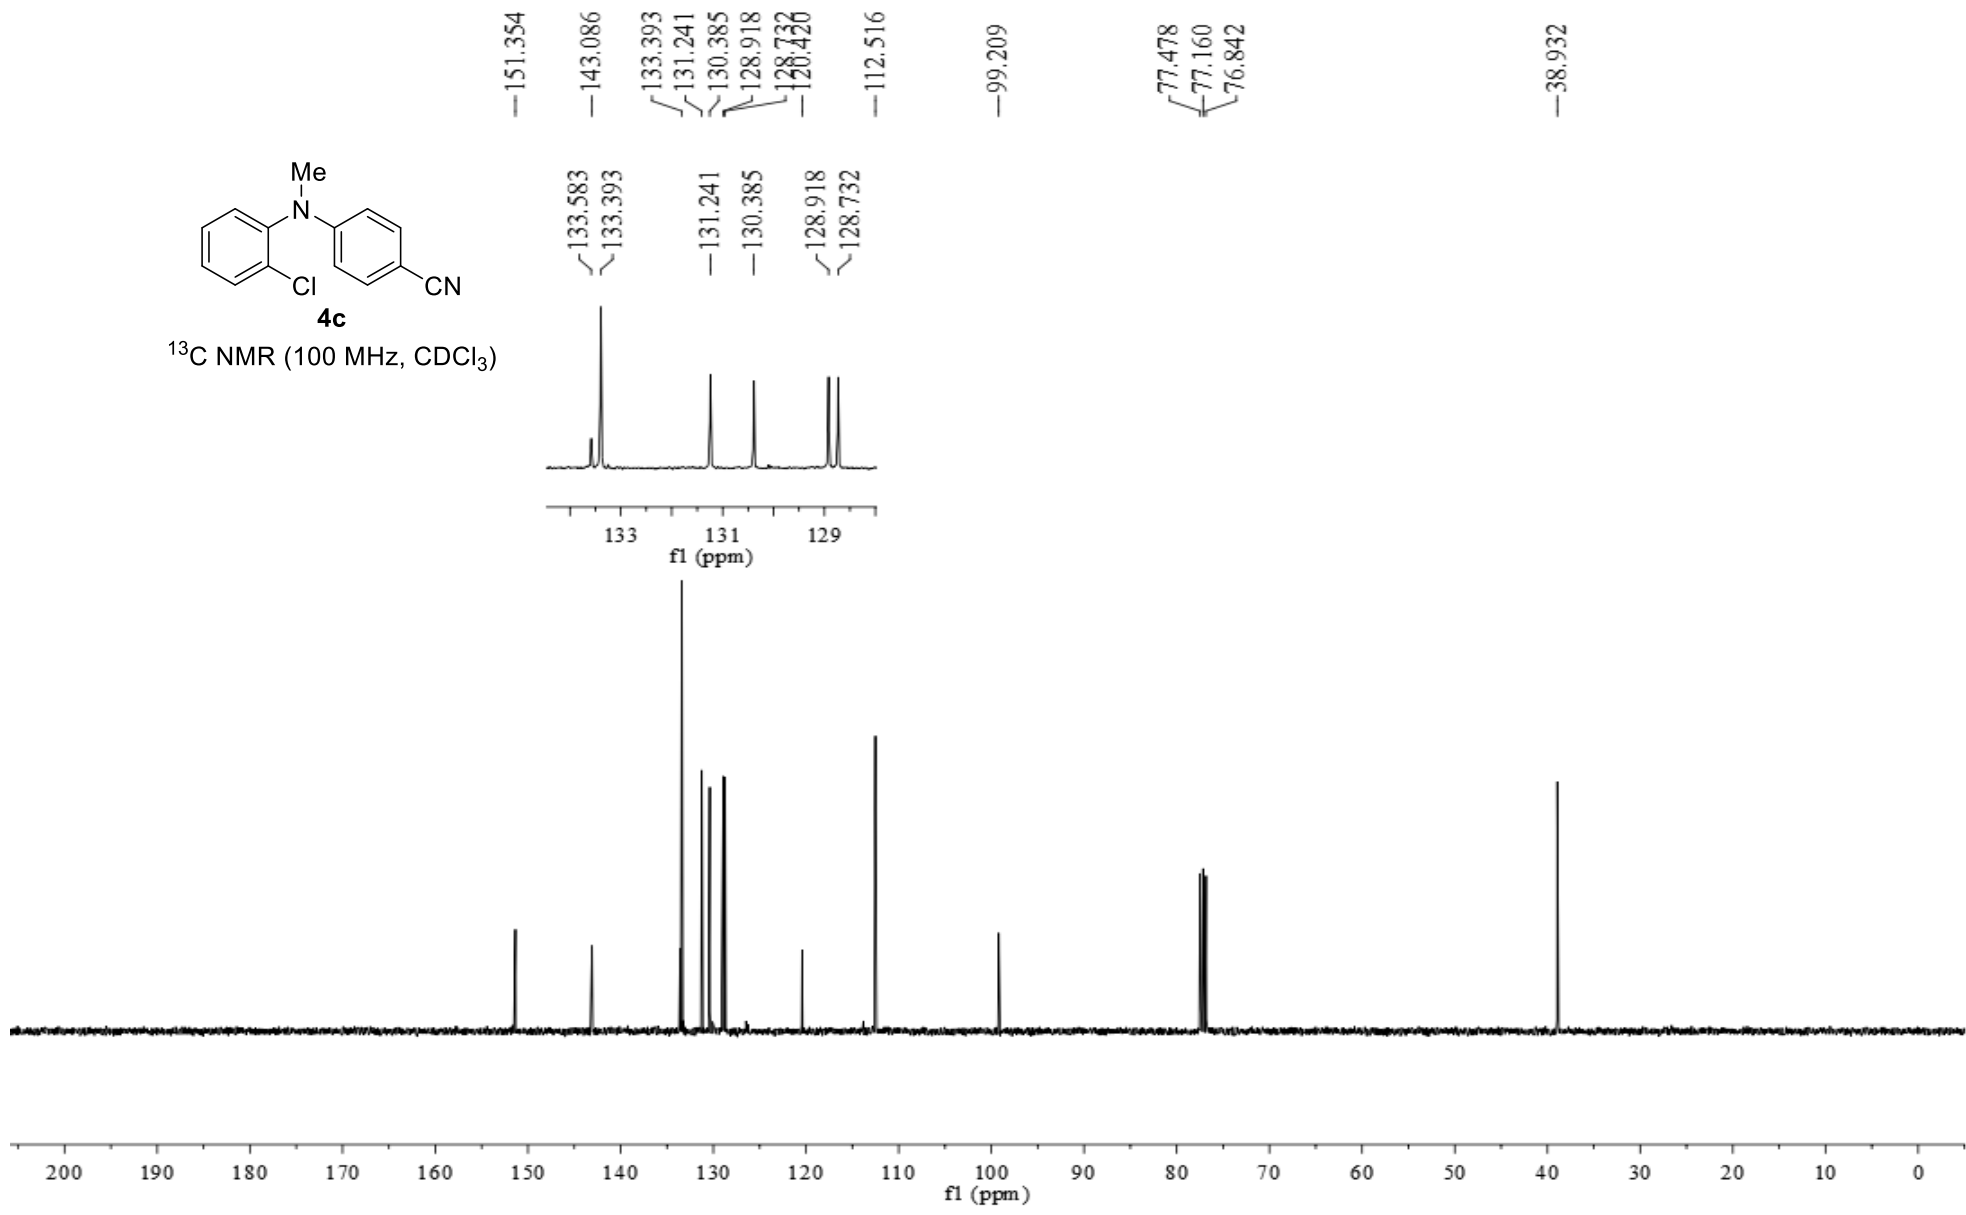

7.894  
7.871  
7.499  
7.496  
7.479  
7.476  
7.330  
7.327  
7.316  
7.309  
7.293  
7.289  
7.265  
7.245  
7.229  
7.224  
6.524  
6.502

4.329  
4.311  
4.293  
4.275

3.266

1.352  
1.334  
1.316

0.000

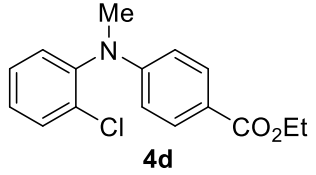

<sup>1</sup>H NMR (400 MHz, CDCl<sub>3</sub>)

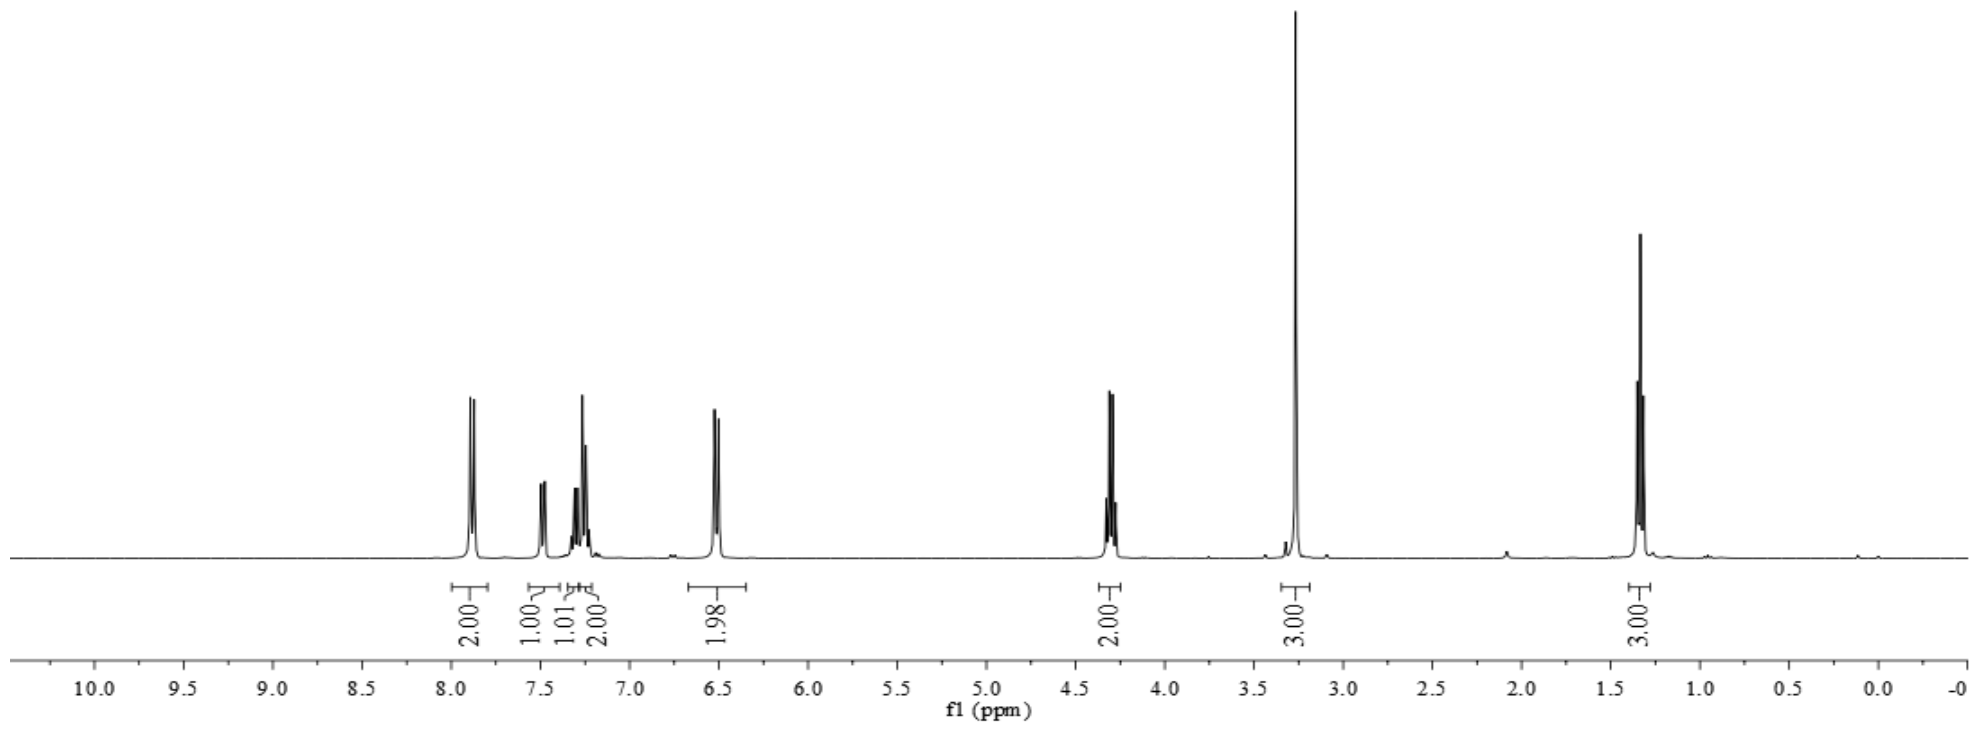

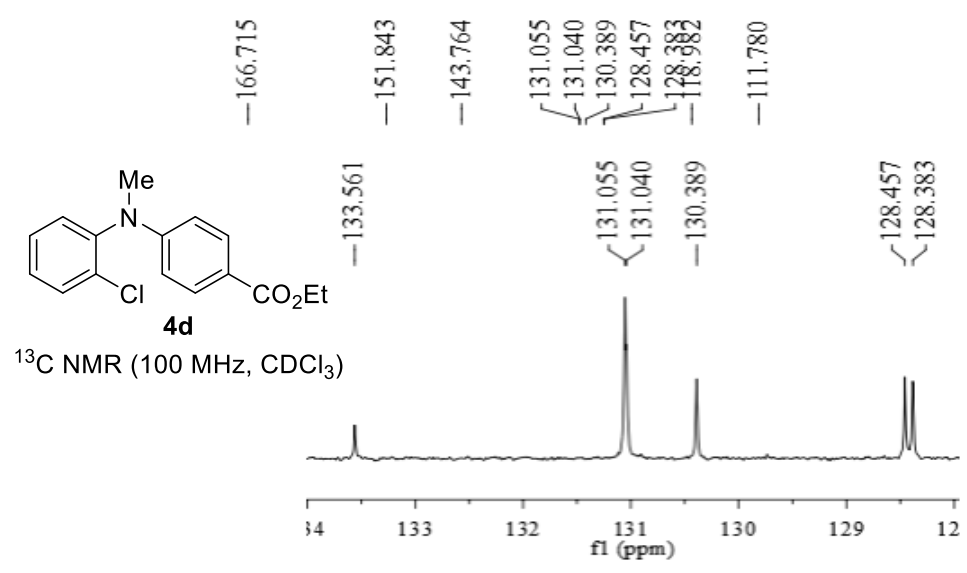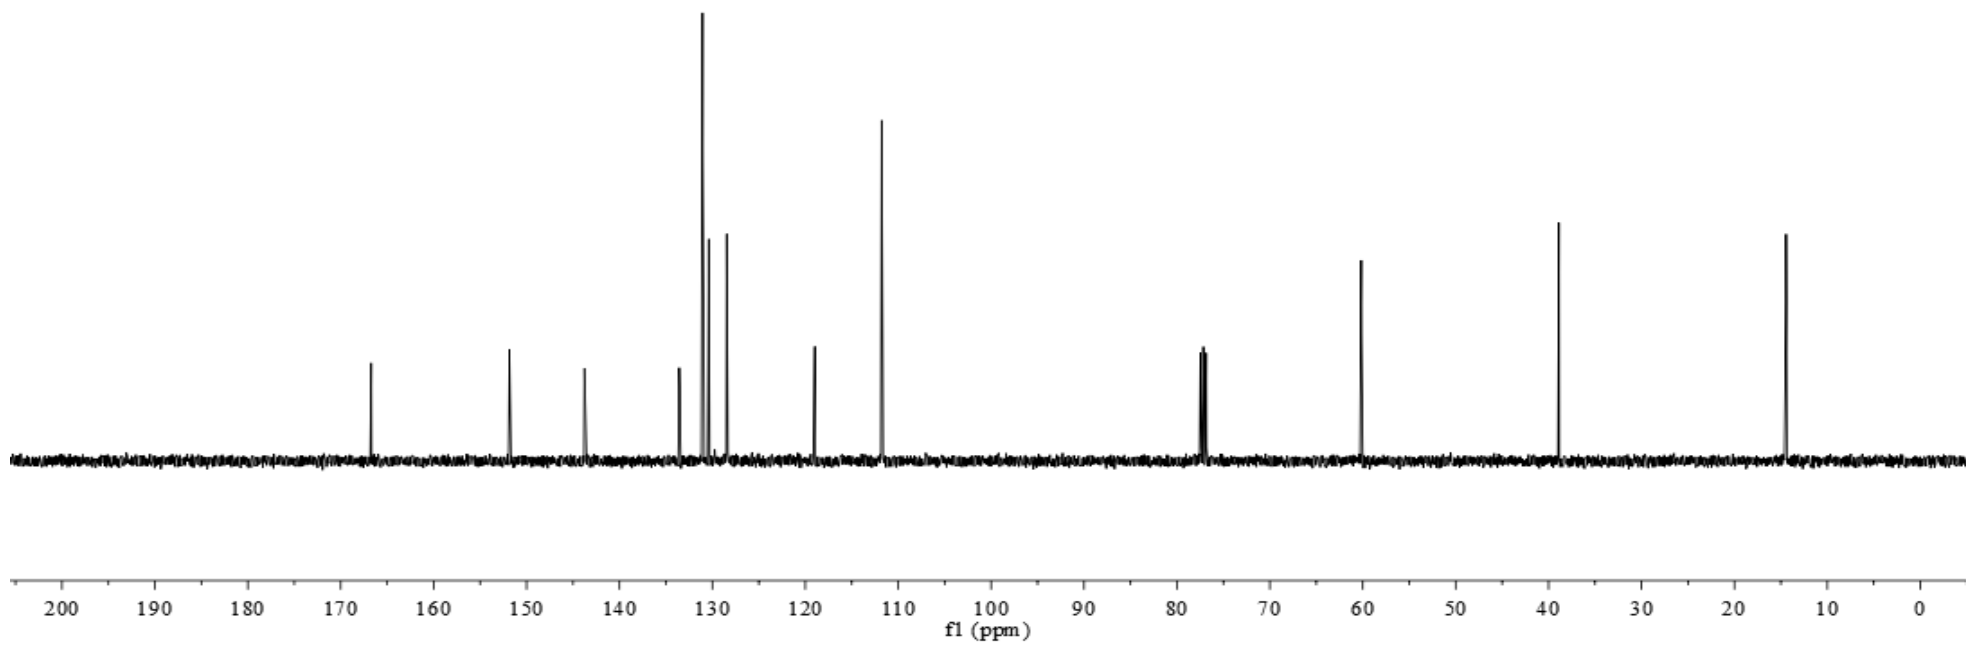

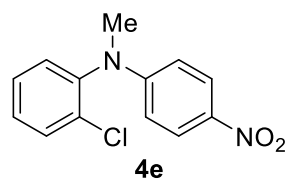

$^1\text{H NMR}$  (400 MHz,  $\text{CDCl}_3$ )

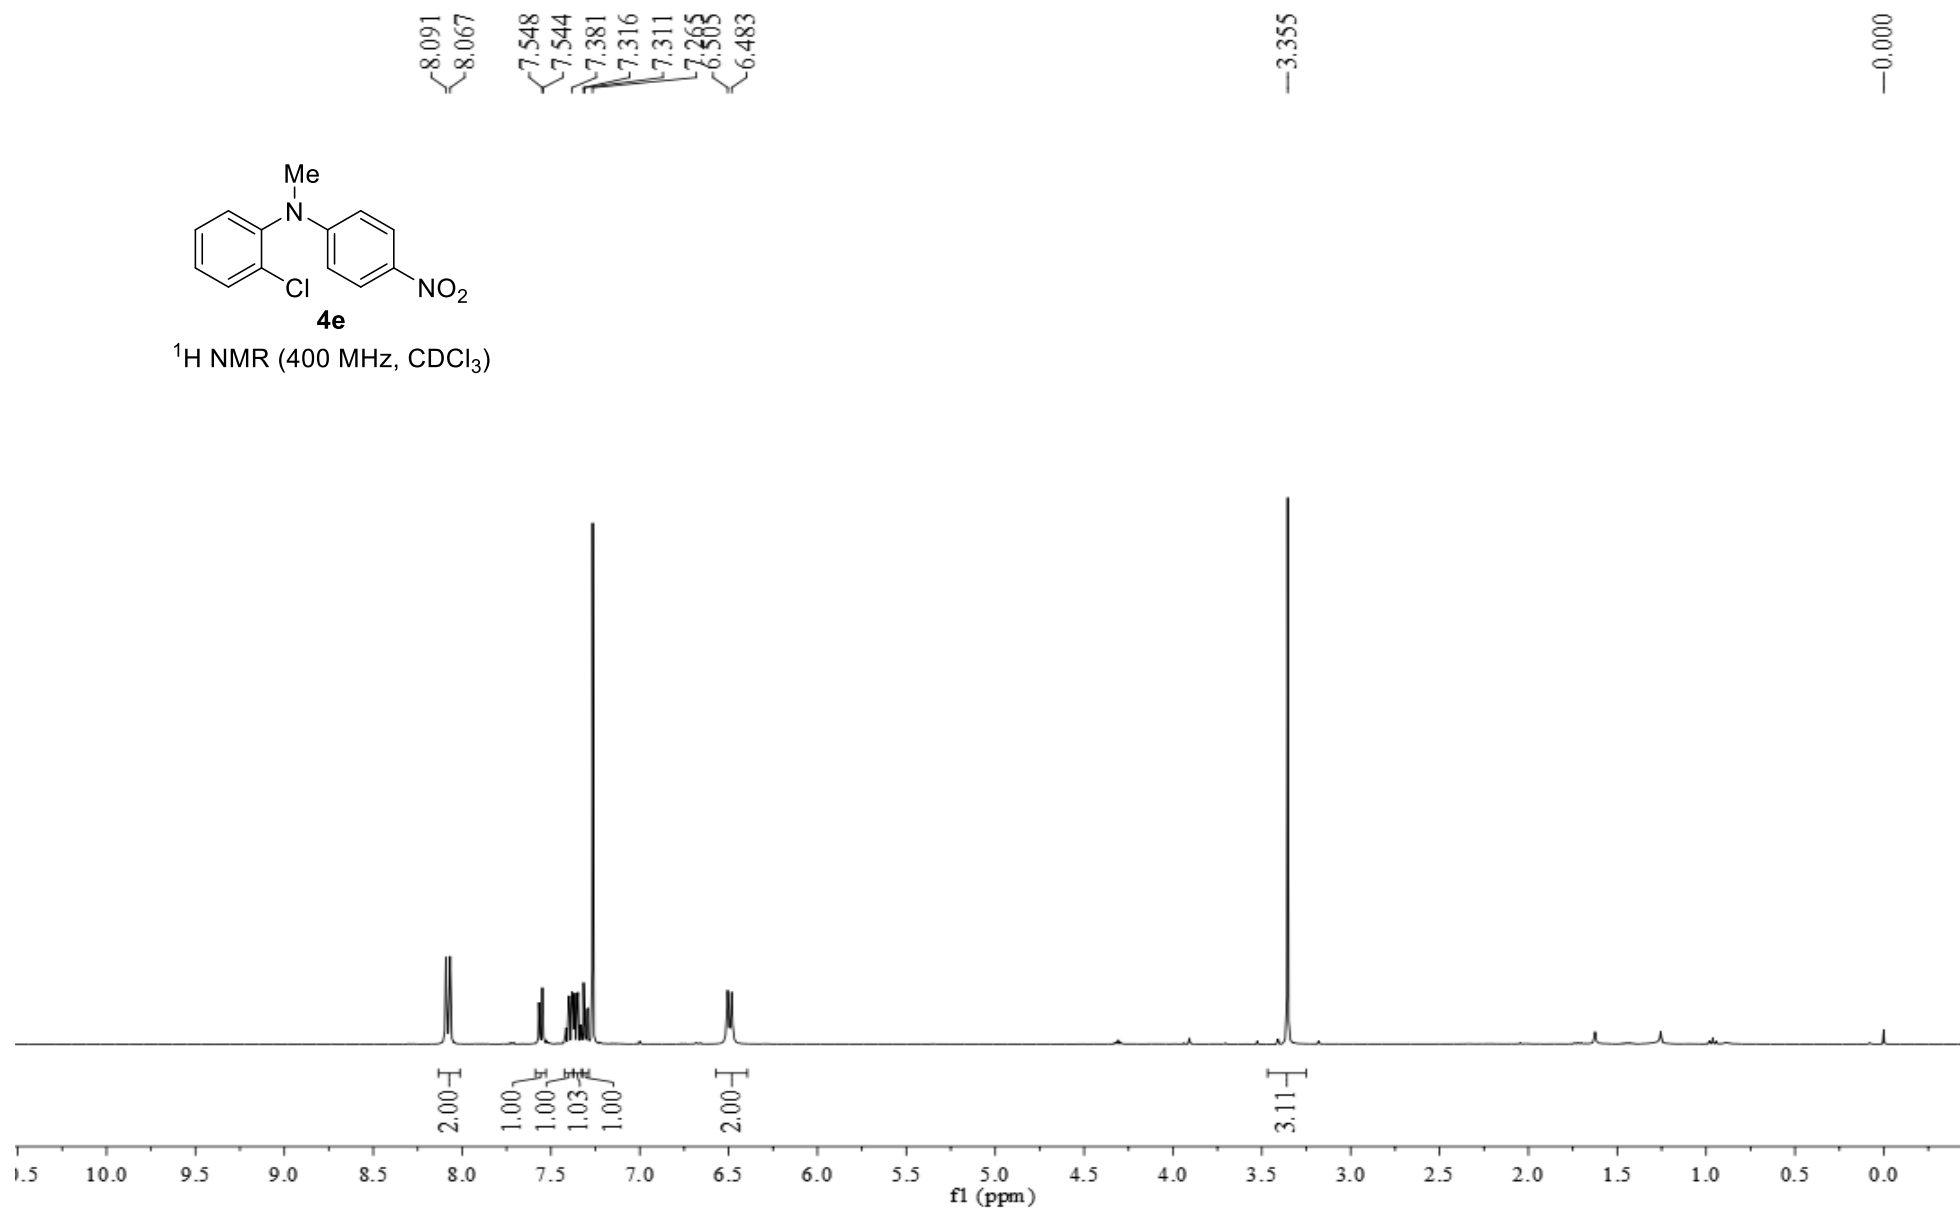

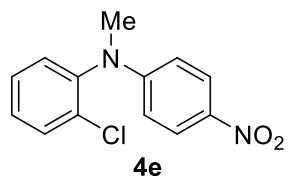

$^{13}\text{C}$  NMR (100 MHz,  $\text{CDCl}_3$ )

153.334  
142.931  
138.469  
133.520  
131.405  
130.317  
129.306  
128.891  
126.018

111.580

77.478  
77.160  
76.842

39.393

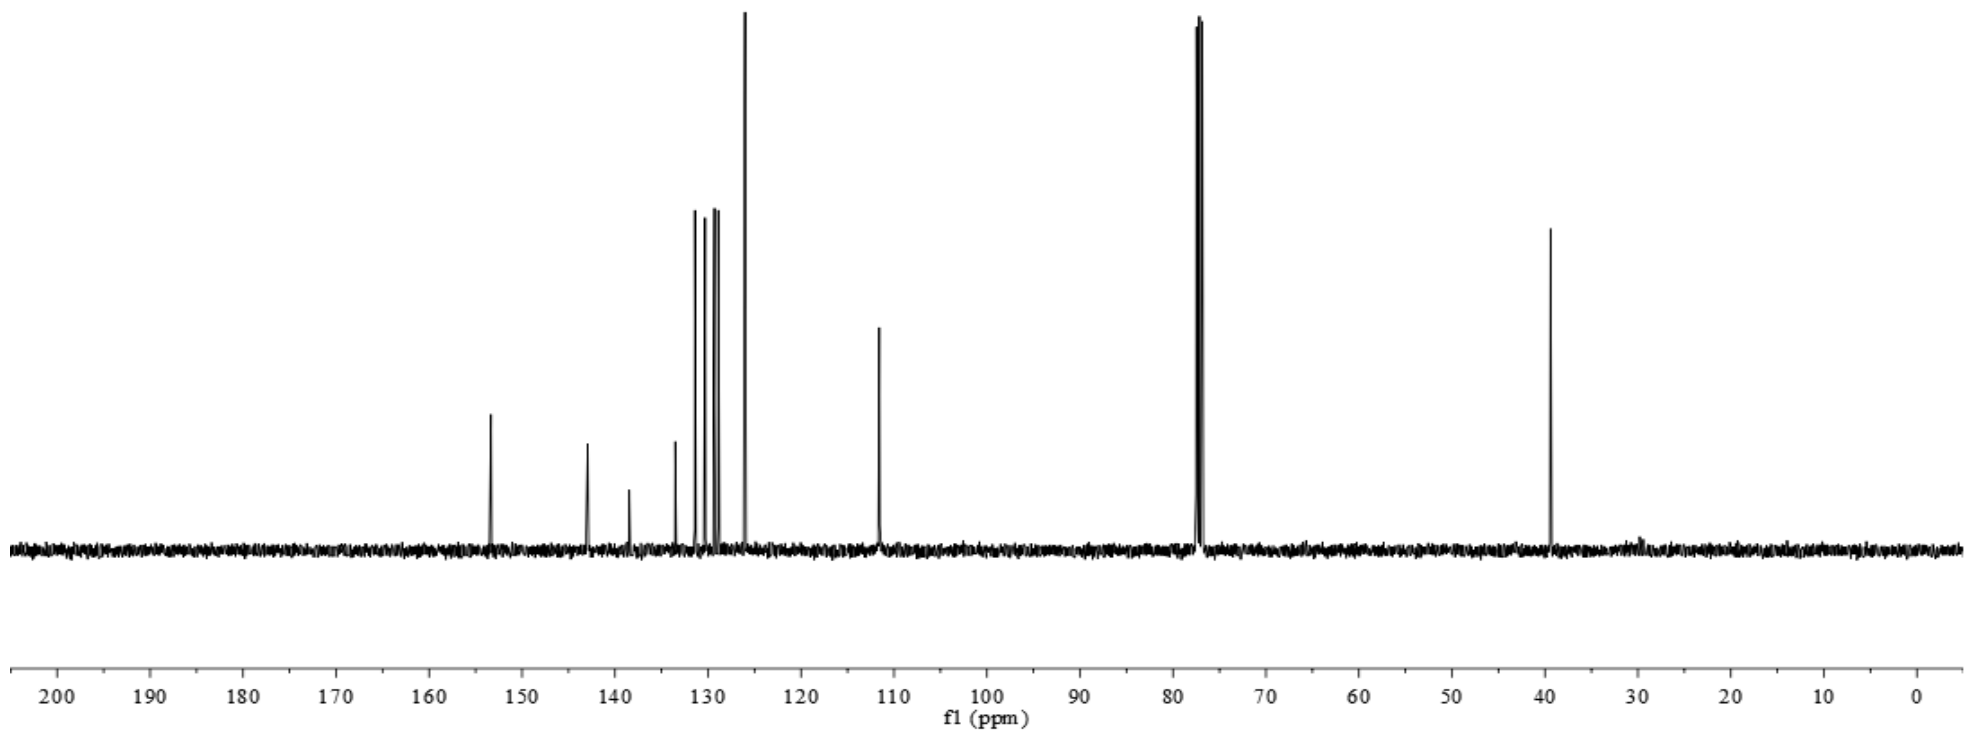

7.456  
7.452  
7.436  
7.433  
7.279  
7.276  
7.260  
7.256  
7.242  
7.239  
7.228  
7.223  
7.209  
7.204  
7.179  
7.174  
7.161  
7.159  
7.156  
7.154  
7.142  
7.136  
6.895  
6.889  
6.883  
6.877  
6.872  
6.868  
6.862  
6.857  
6.851  
6.547  
6.541  
6.536  
6.530  
6.524  
6.519  
6.513  
-0.000

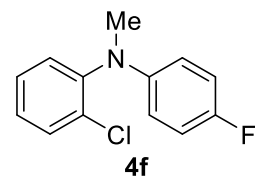

<sup>1</sup>H NMR (400 MHz, CDCl<sub>3</sub>)

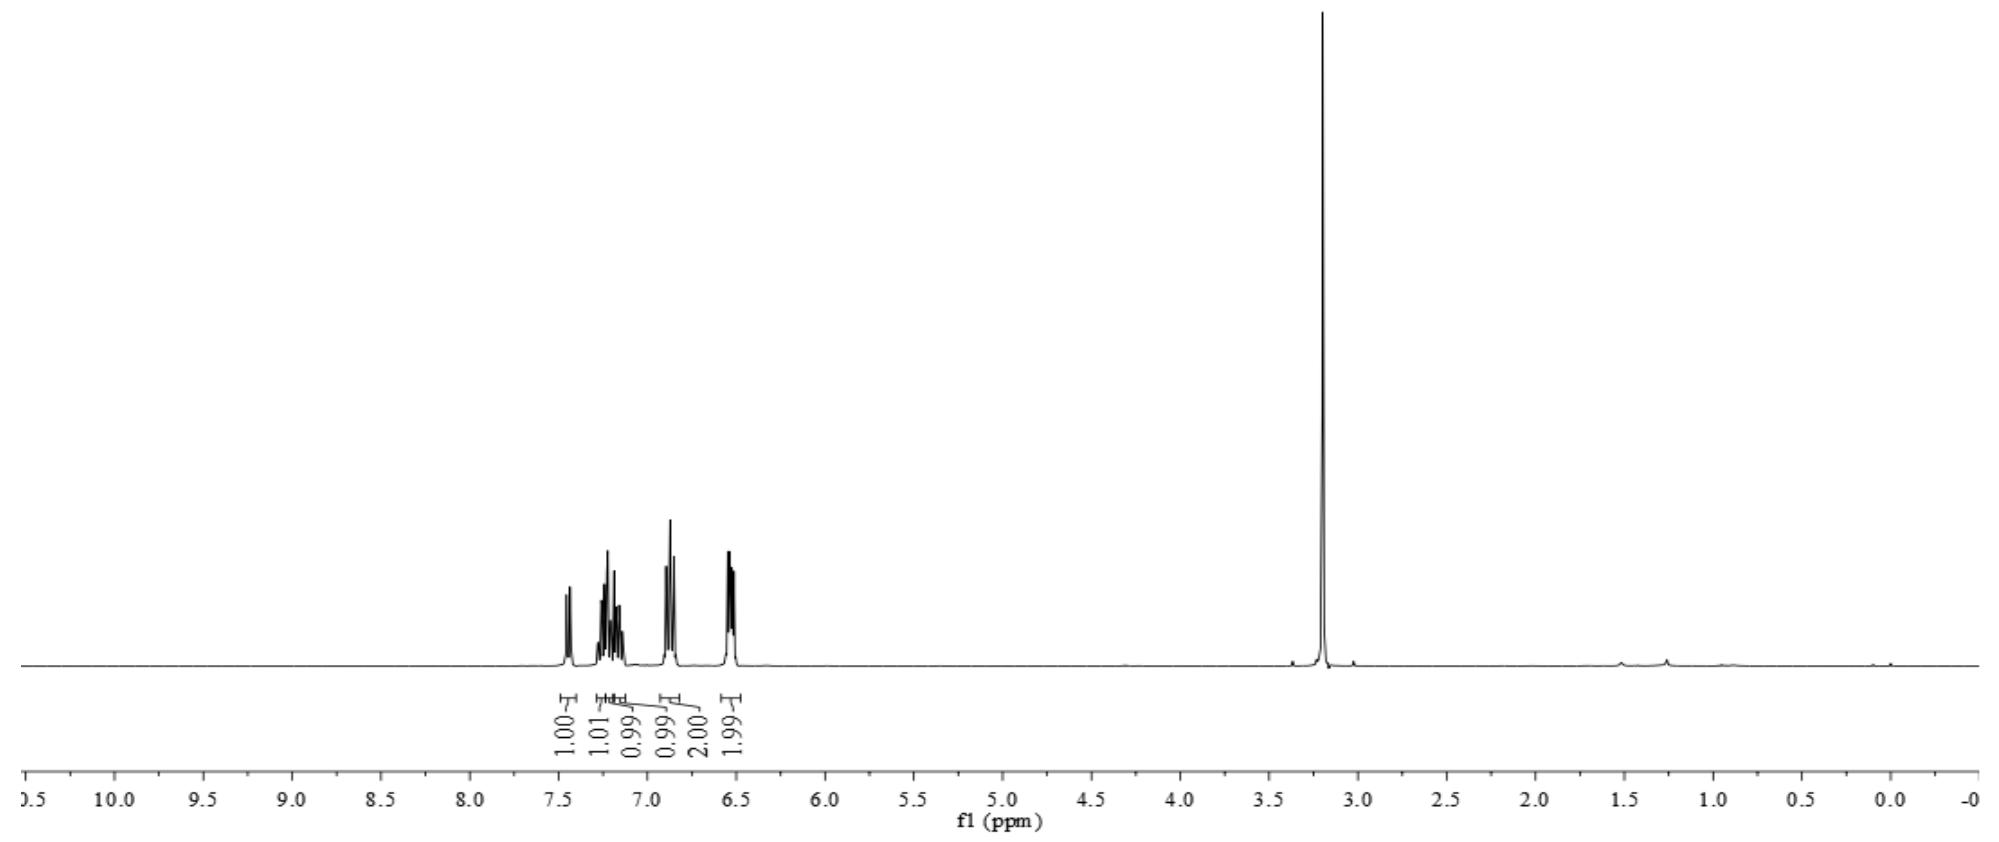

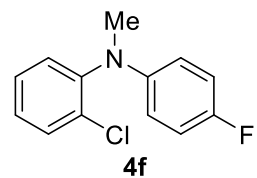

$^{13}\text{C}$  NMR (100 MHz,  $\text{CDCl}_3$ )

157.445  
155.095  
145.739  
145.339  
145.321  
131.102  
129.702  
128.339  
115.579  
115.358  
115.069  
114.995  
77.478  
77.160  
76.842  
39.599

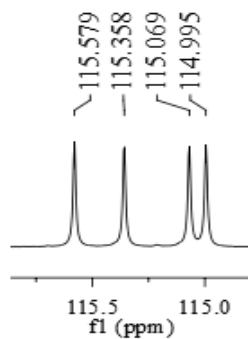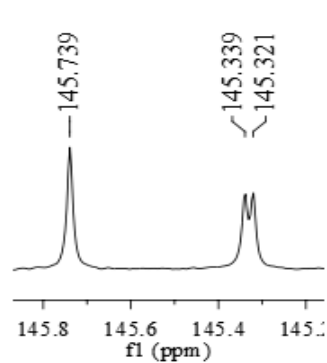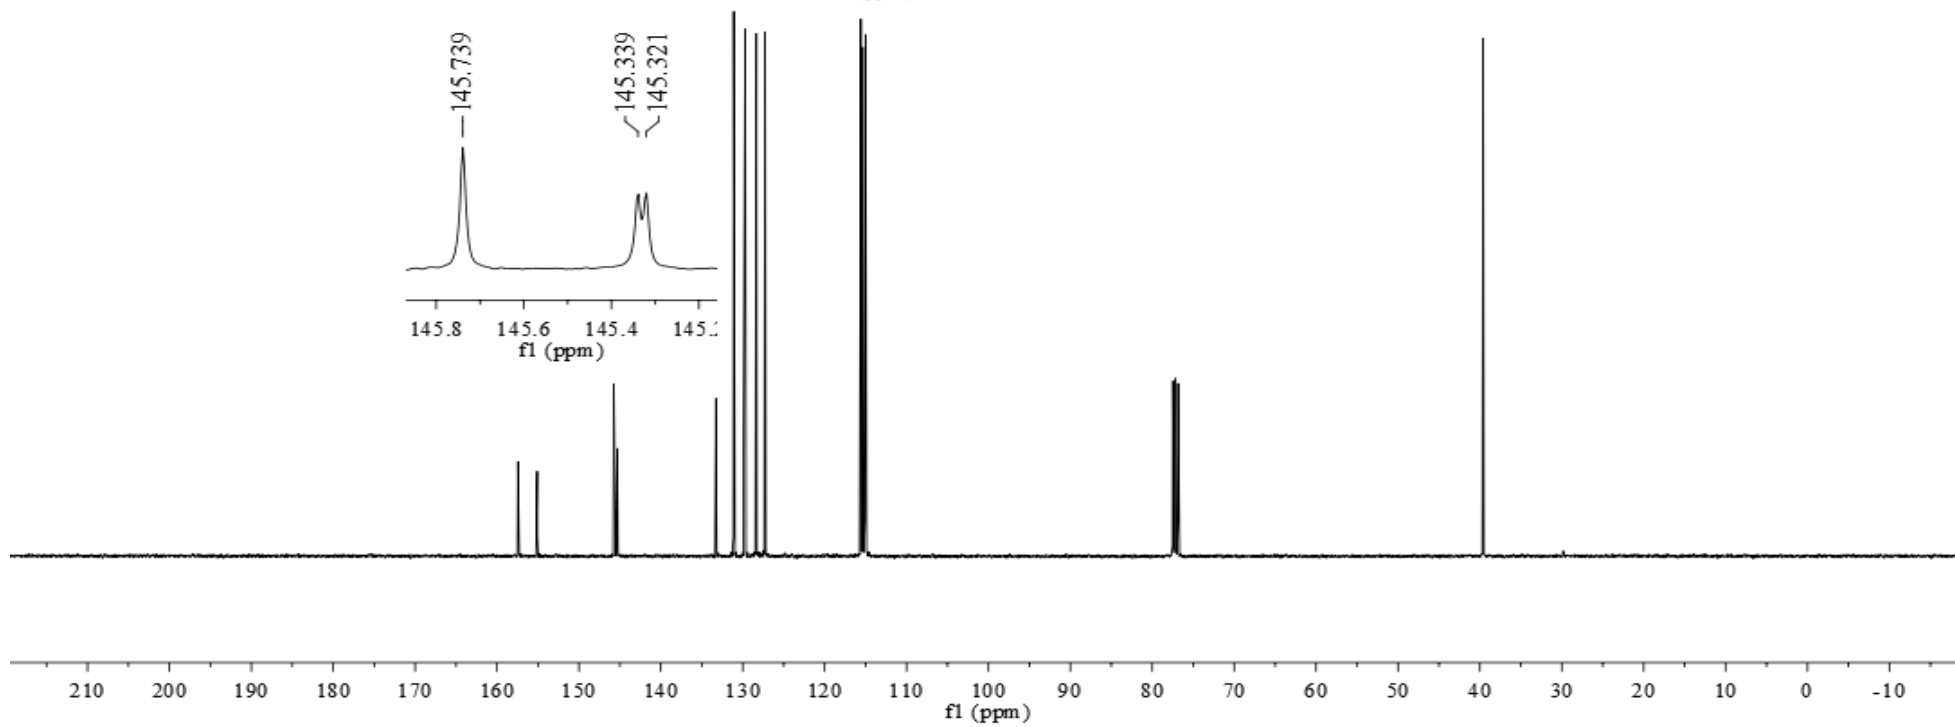



7.472  
7.468  
7.452  
7.448  
7.277  
7.274  
7.260  
7.256  
7.239  
7.234  
7.219  
7.214  
7.209  
7.194  
7.177  
7.113  
7.108  
7.096  
7.099  
6.503  
6.494  
6.489  
6.477  
6.472  
6.463

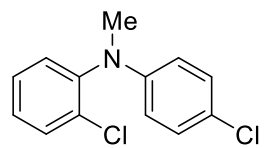

<sup>1</sup>H NMR (400 MHz, CDCl<sub>3</sub>)

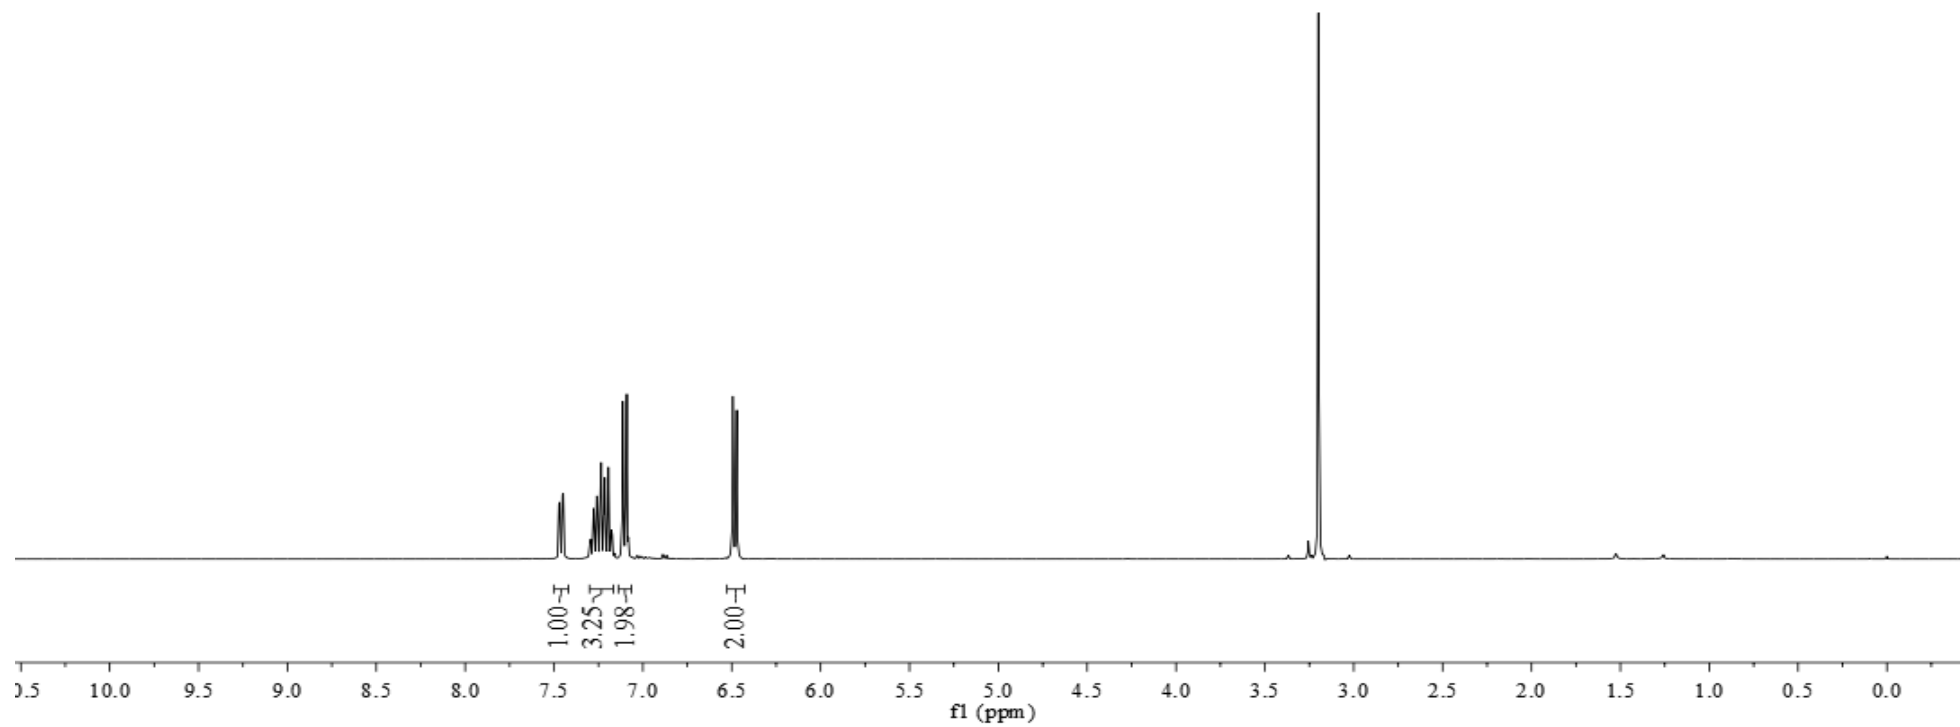

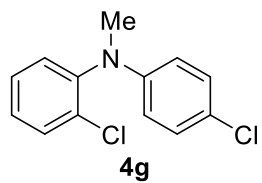

$^{13}\text{C}$  NMR (100 MHz,  $\text{CDCl}_3$ )

147.298  
144.894  
133.578  
131.124  
130.168  
128.853  
128.433  
127.794  
122.688  
114.606

77.477  
77.160  
76.842

39.187

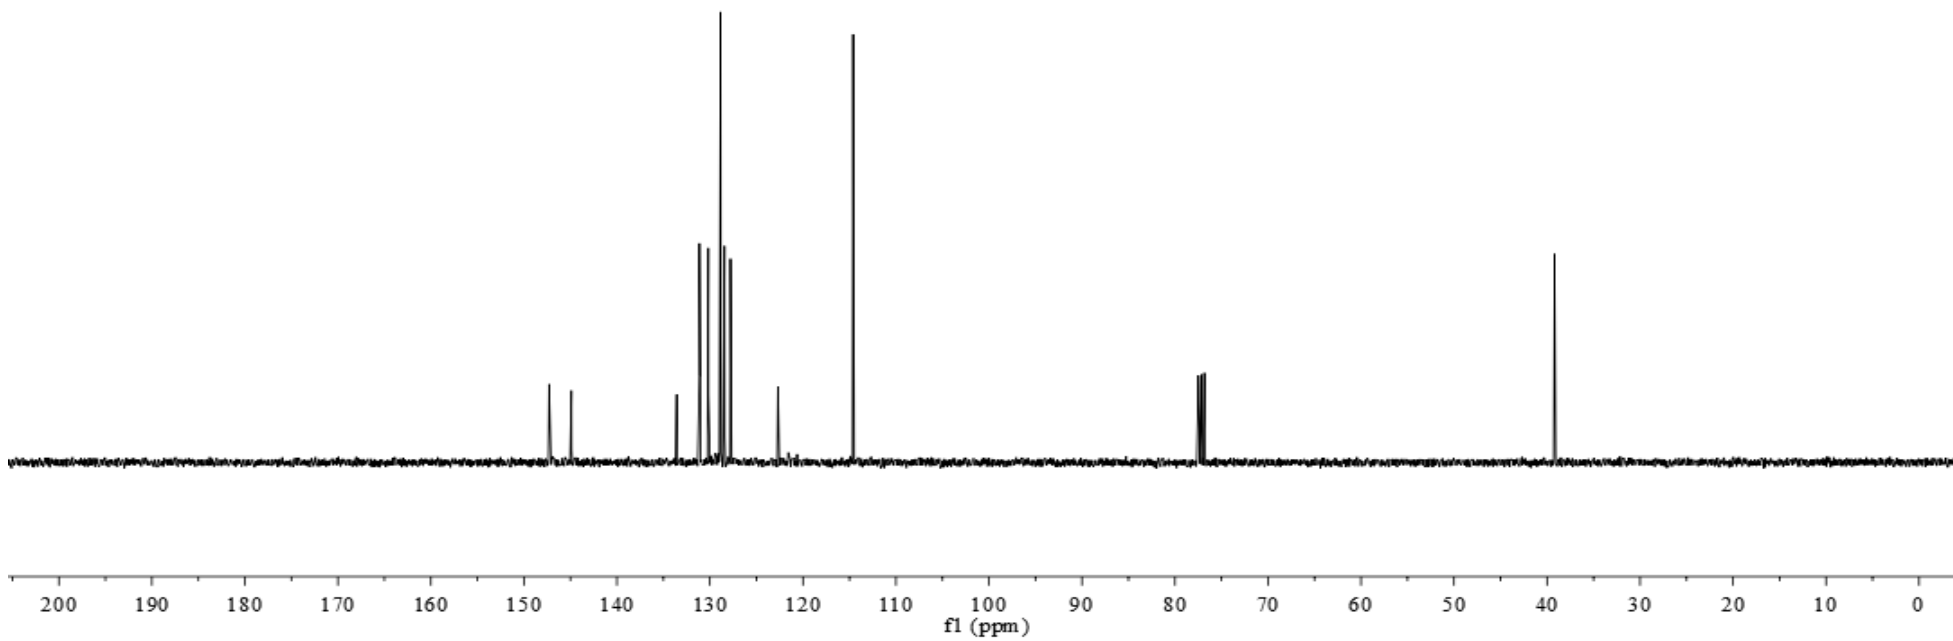

7.494  
7.491  
7.474  
7.471  
7.323  
7.319  
7.302  
7.286  
7.282  
7.261  
7.256  
7.241  
7.240  
7.226  
7.208  
7.203  
6.465  
6.457  
6.440  
6.435  
6.427

—3.214

—0.000

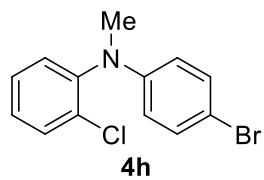

$^1\text{H}$  NMR (400 MHz,  $\text{CDCl}_3$ )

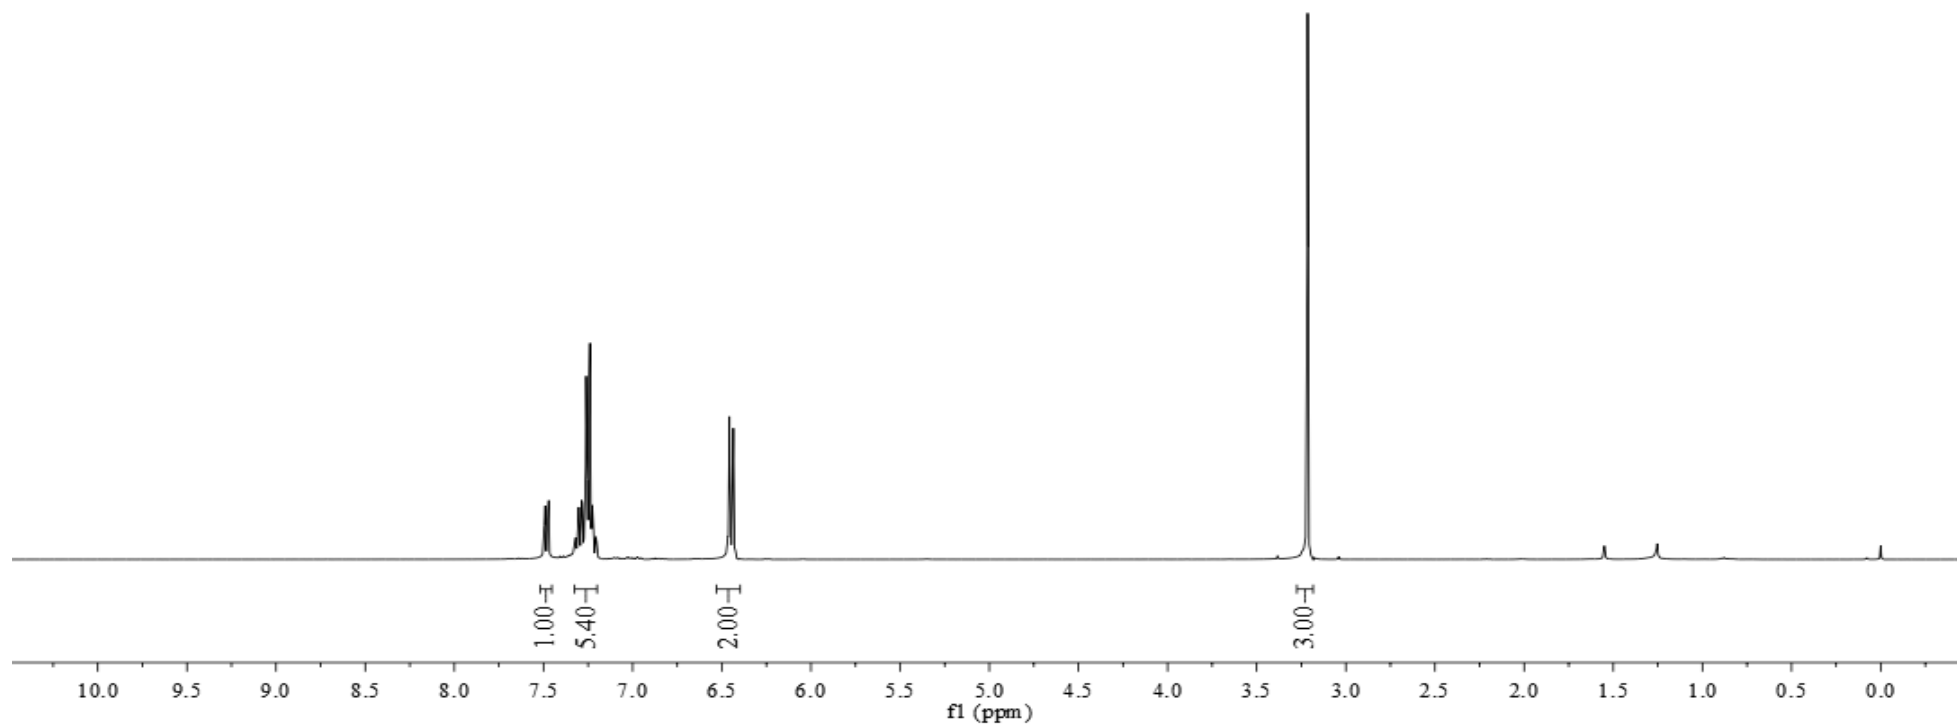

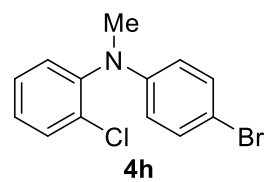

$^{13}\text{C}$  NMR (100 MHz,  $\text{CDCl}_3$ )

147.716  
144.793  
133.654  
131.758  
131.170  
130.243  
128.468  
127.898  
115.049  
109.900  
77.477  
77.160  
76.842  
39.163

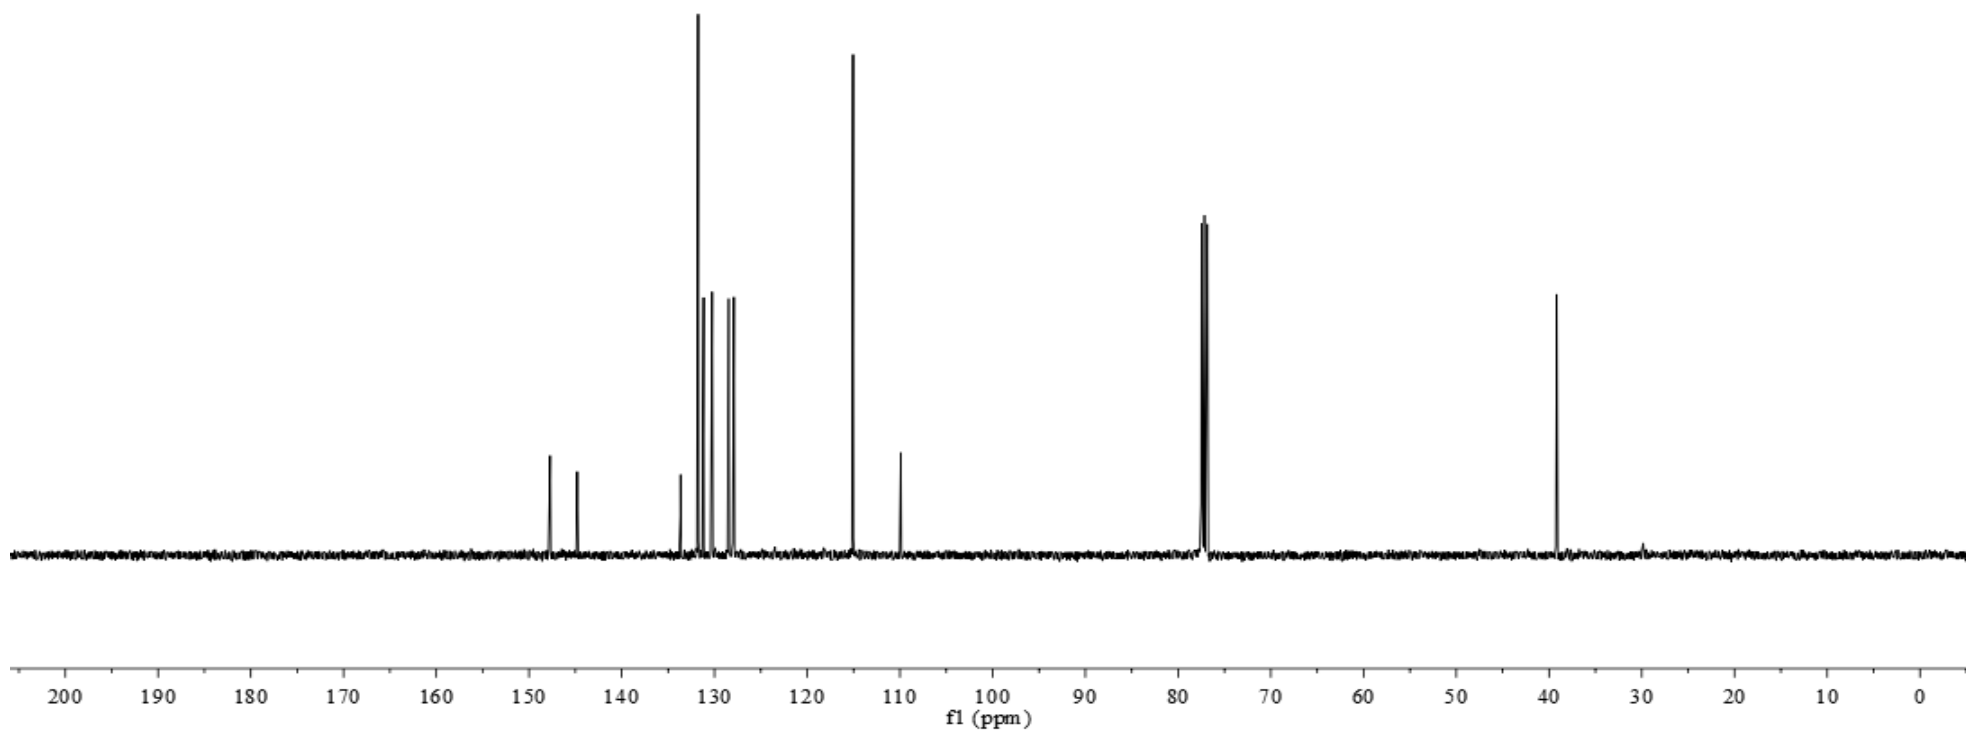

7.480  
7.478  
7.462  
7.459  
7.457  
7.275  
7.272  
7.265  
7.260  
7.257  
7.204  
7.196  
7.194  
7.189  
7.184  
7.182  
7.089  
7.070  
7.050  
6.999  
6.580  
6.429  
6.411  
6.405  
6.390  
6.384

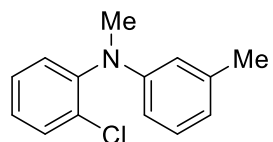

**4i**

$^1\text{H}$  NMR (400 MHz,  $\text{CDCl}_3$ )

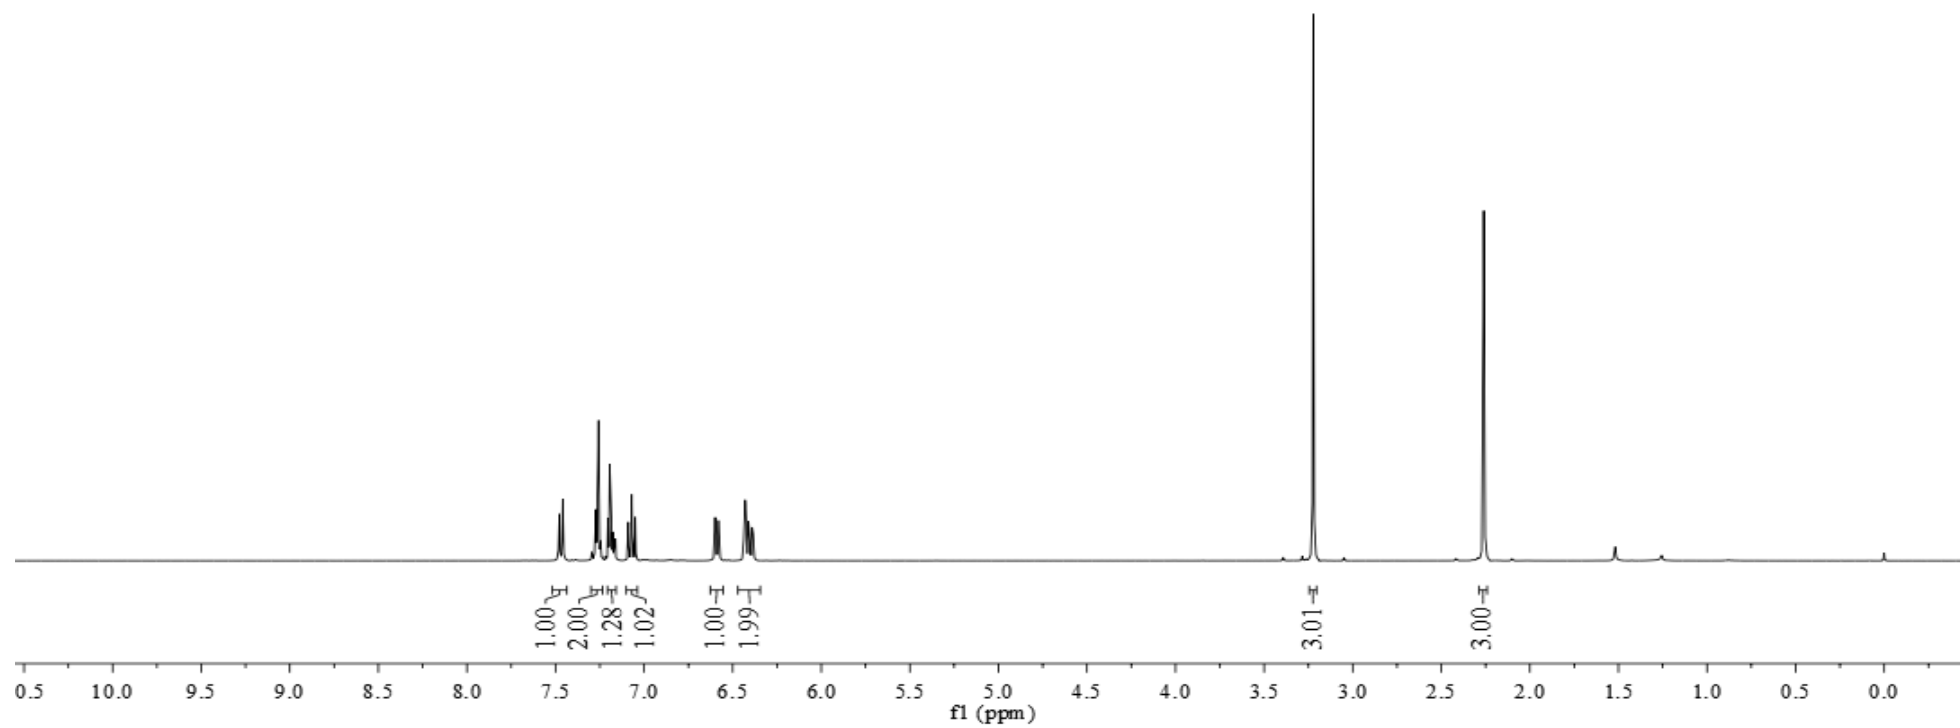

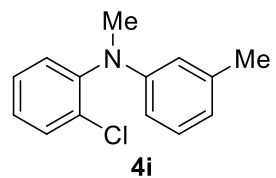

<sup>13</sup>C NMR (100 MHz, CDCl<sub>3</sub>)

148.723  
145.547  
138.788  
133.677  
131.012  
130.285  
128.910  
128.244  
127.352  
118.901  
114.271  
110.907

77.478  
77.160  
76.842

39.115

21.924

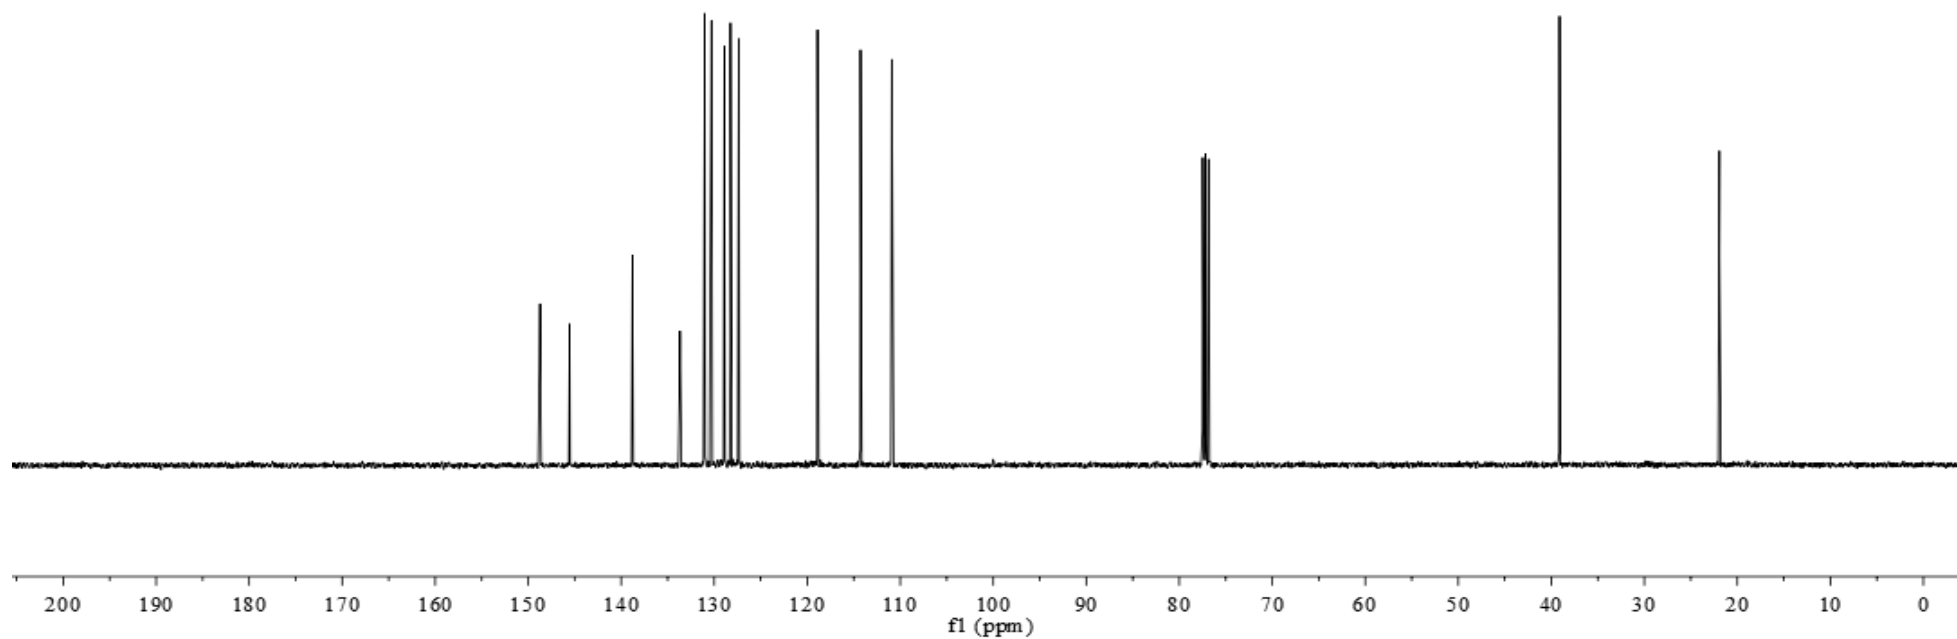

7.350  
7.347  
7.331  
7.327  
7.171  
7.151  
7.135  
7.132  
7.116  
7.113  
7.097  
7.093  
7.018  
7.010  
7.007  
6.998  
6.992  
6.989  
6.973  
6.970  
6.966  
6.962  
6.947  
6.943  
6.928  
6.924  
6.915  
6.911  
6.895  
6.891

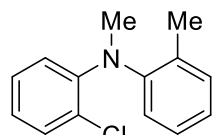

**4j**

<sup>1</sup>H NMR (400 MHz, CDCl<sub>3</sub>)

-3.151

-2.010

-0.000

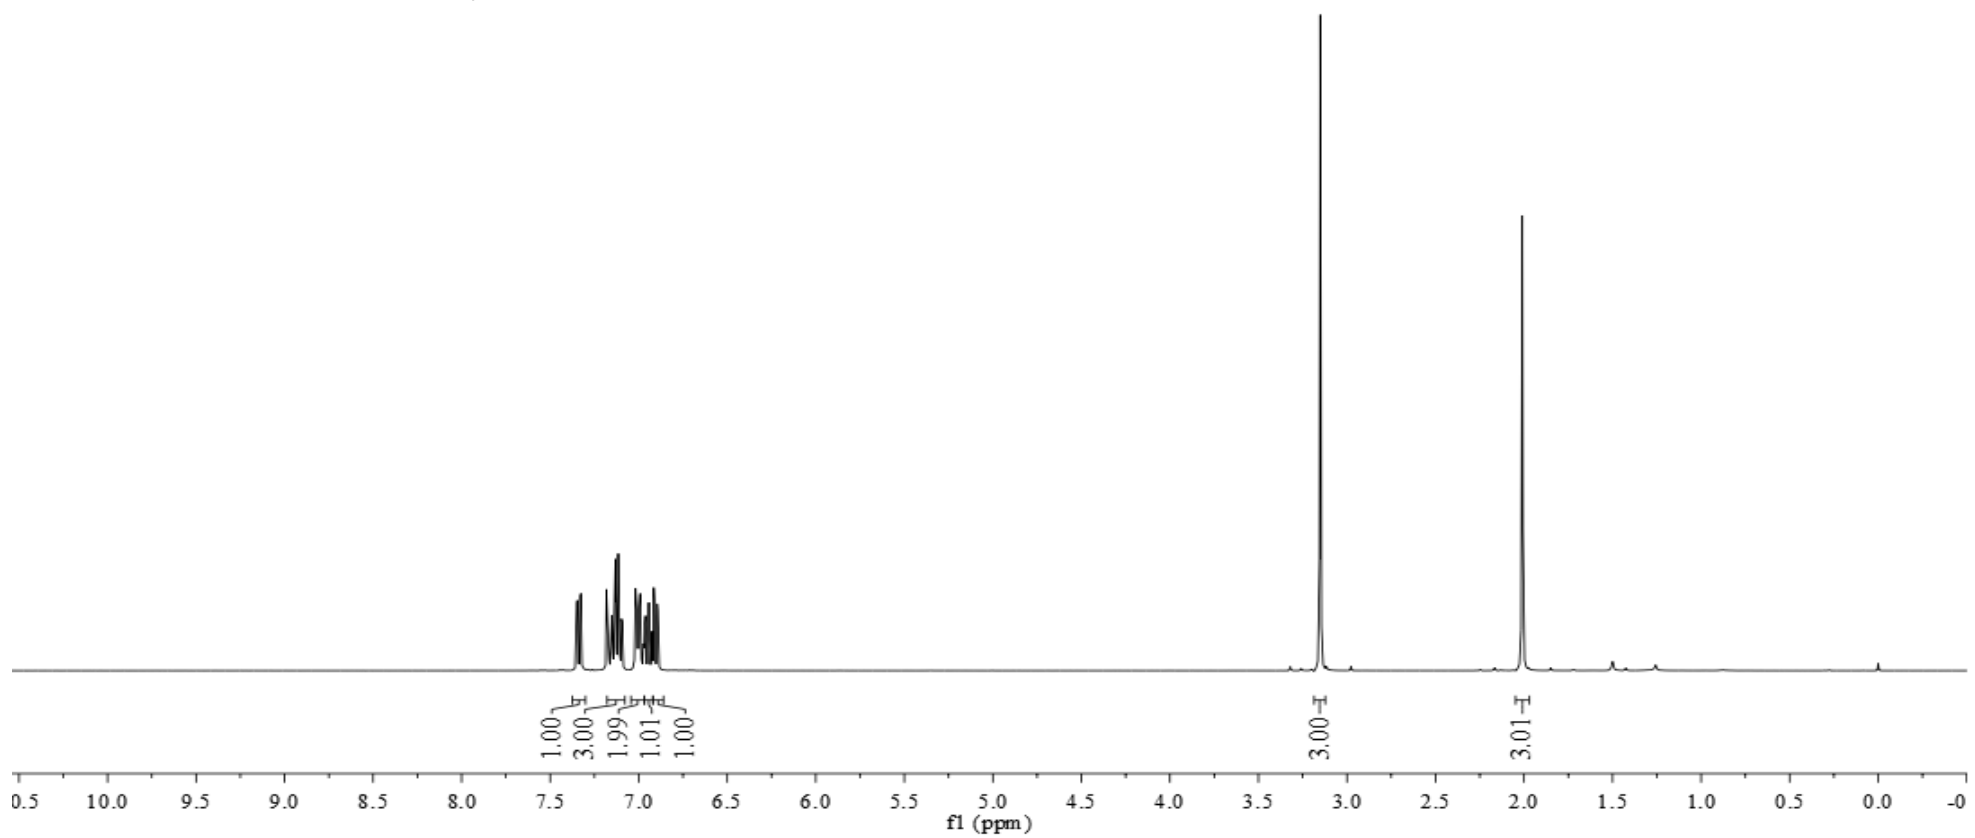

S31

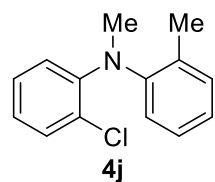

$^{13}\text{C}$  NMR (100 MHz,  $\text{CDCl}_3$ )

149.130  
148.366  
133.013  
131.531  
131.013  
129.349  
127.560  
126.659  
124.157  
124.027  
123.578  
121.449

77.478  
77.160  
76.842

41.080

18.639

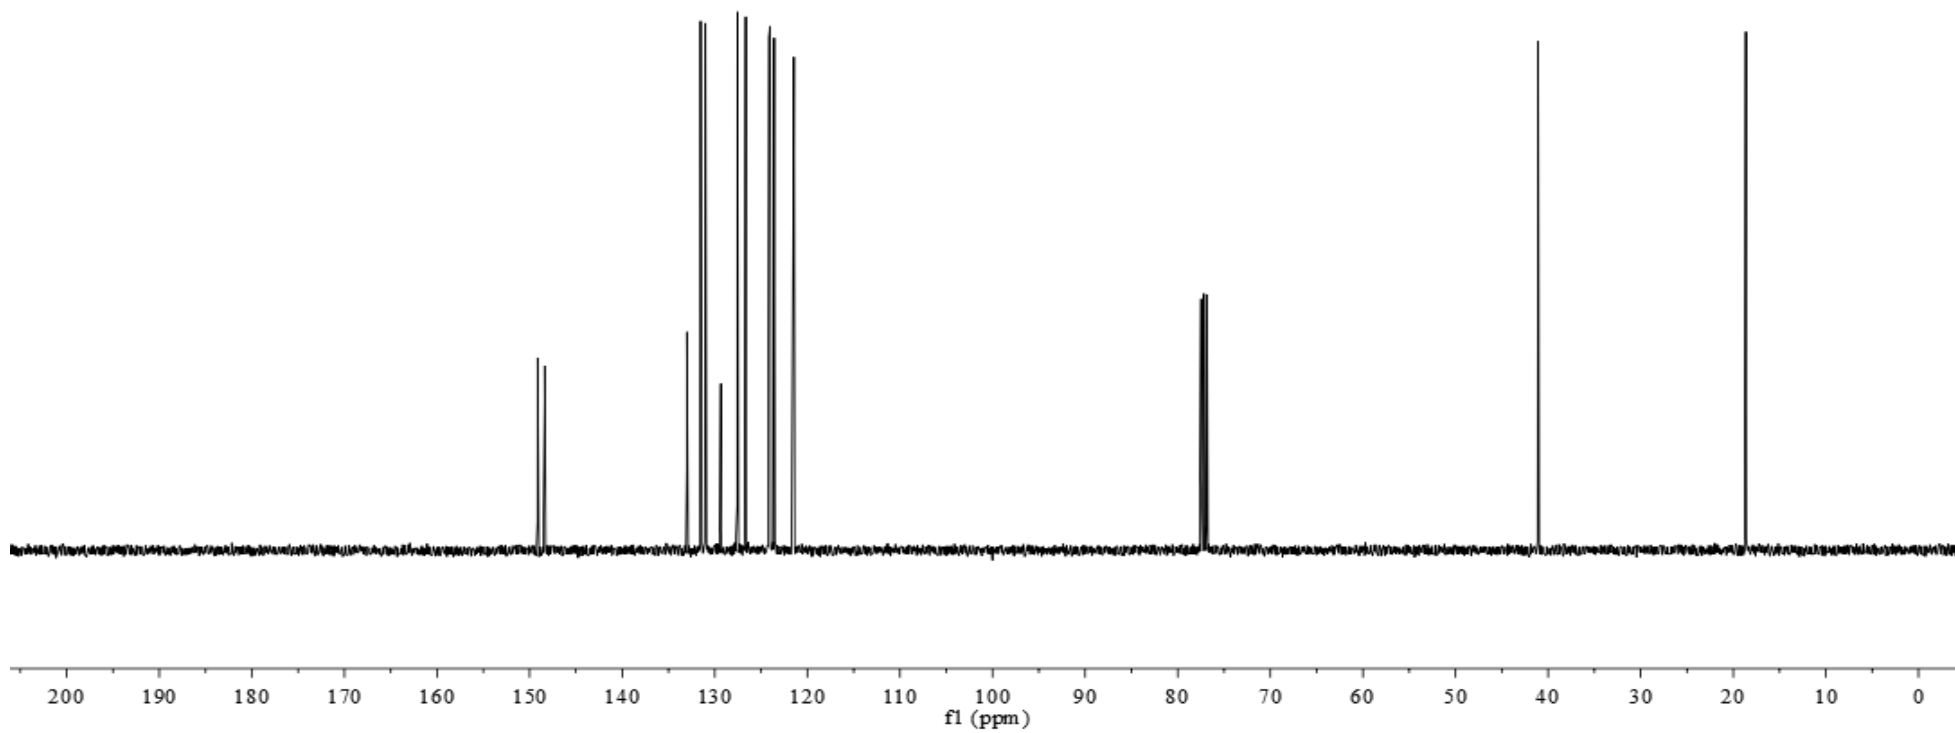



7.454  
7.451  
7.433  
7.275  
7.265  
7.262  
7.257  
7.250  
7.249  
7.238  
7.186  
7.178  
7.172  
7.166  
7.164  
7.158  
7.153  
7.144  
6.982  
6.961  
6.534  
6.512  
5.750  
4.359  
4.342  
3.208  
2.788  
2.751  
2.558  
2.549  
2.533  
2.458  
2.446  
2.435  
2.419  
2.401  
2.383  
2.369  
2.359  
2.331  
2.315  
2.283  
2.251  
2.241  
2.219  
2.207  
2.012  
2.001  
1.989  
1.980  
1.969  
1.953  
1.945  
1.867  
1.735  
1.717  
1.689  
0.560

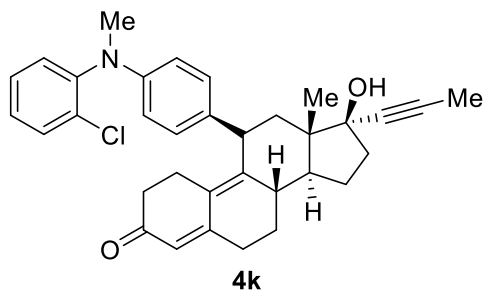

<sup>1</sup>H NMR (400 MHz, CDCl<sub>3</sub>)

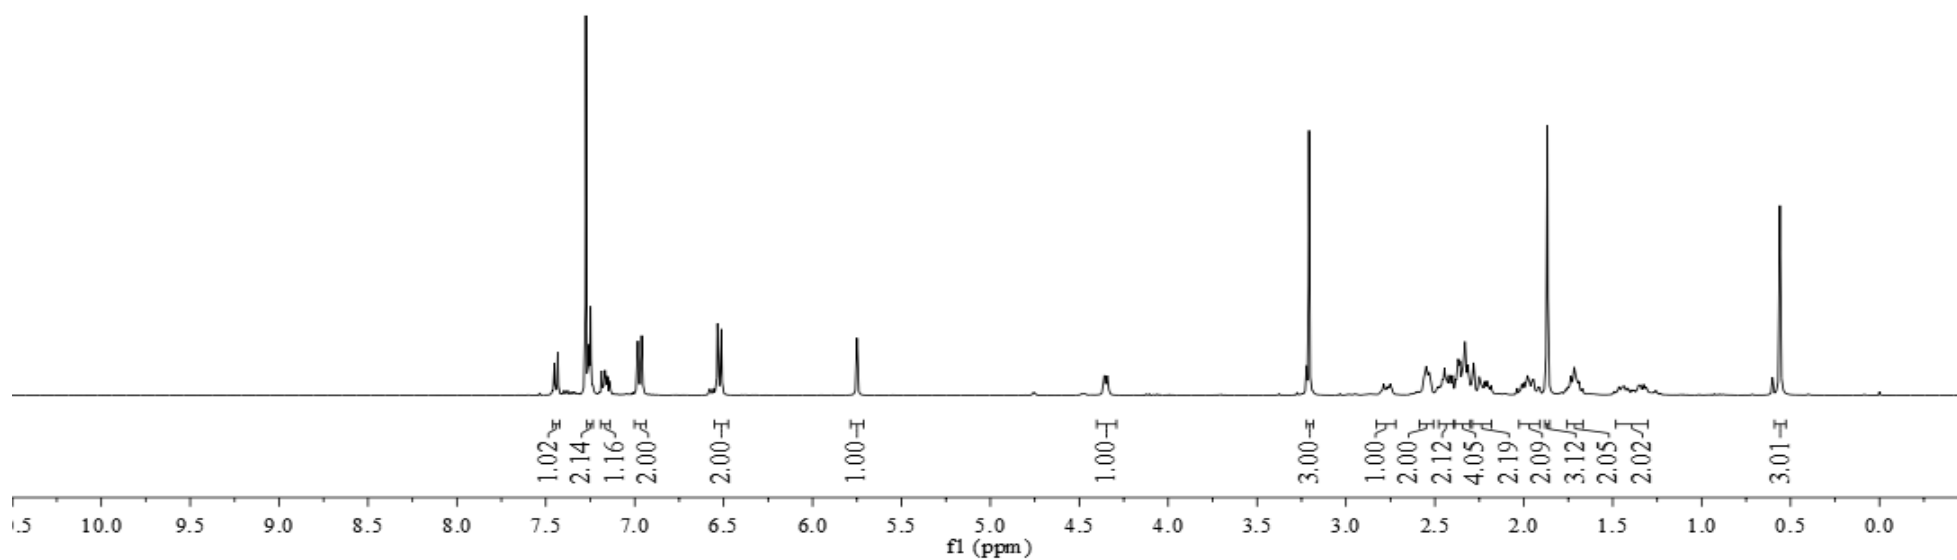

—199.797

—157.116

146.885

146.469

145.478

133.413

130.887

129.864

128.099

127.337

123.831

82.447

82.260

80.042

77.478

77.160

76.842

49.788

46.841

39.577

39.106

39.039

38.799

36.807

31.099

27.311

25.786

23.317

—13.775

—3.886

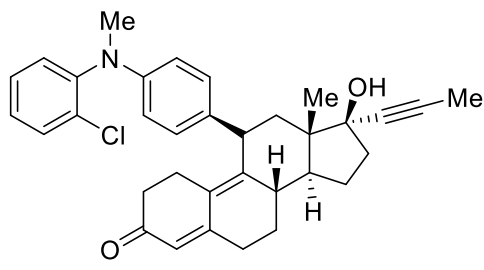

**4k**

<sup>13</sup>C NMR (100 MHz, CDCl<sub>3</sub>)

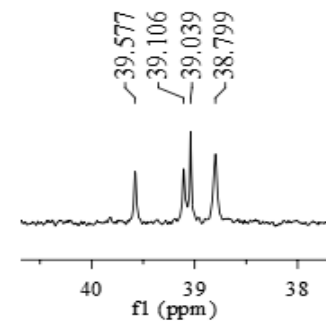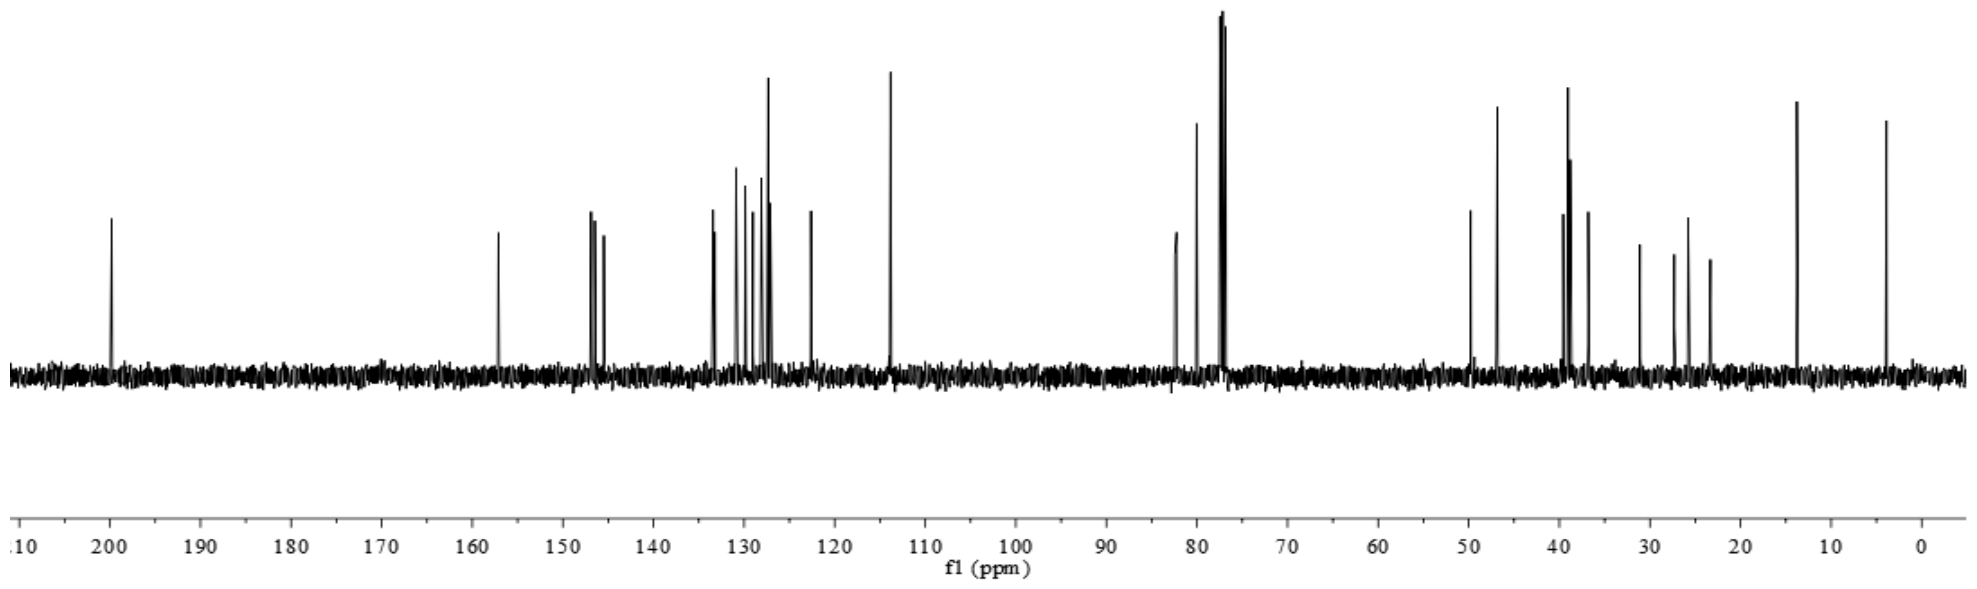

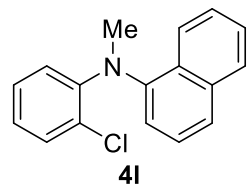

$^1\text{H}$  NMR (400 MHz,  $\text{CDCl}_3$ )

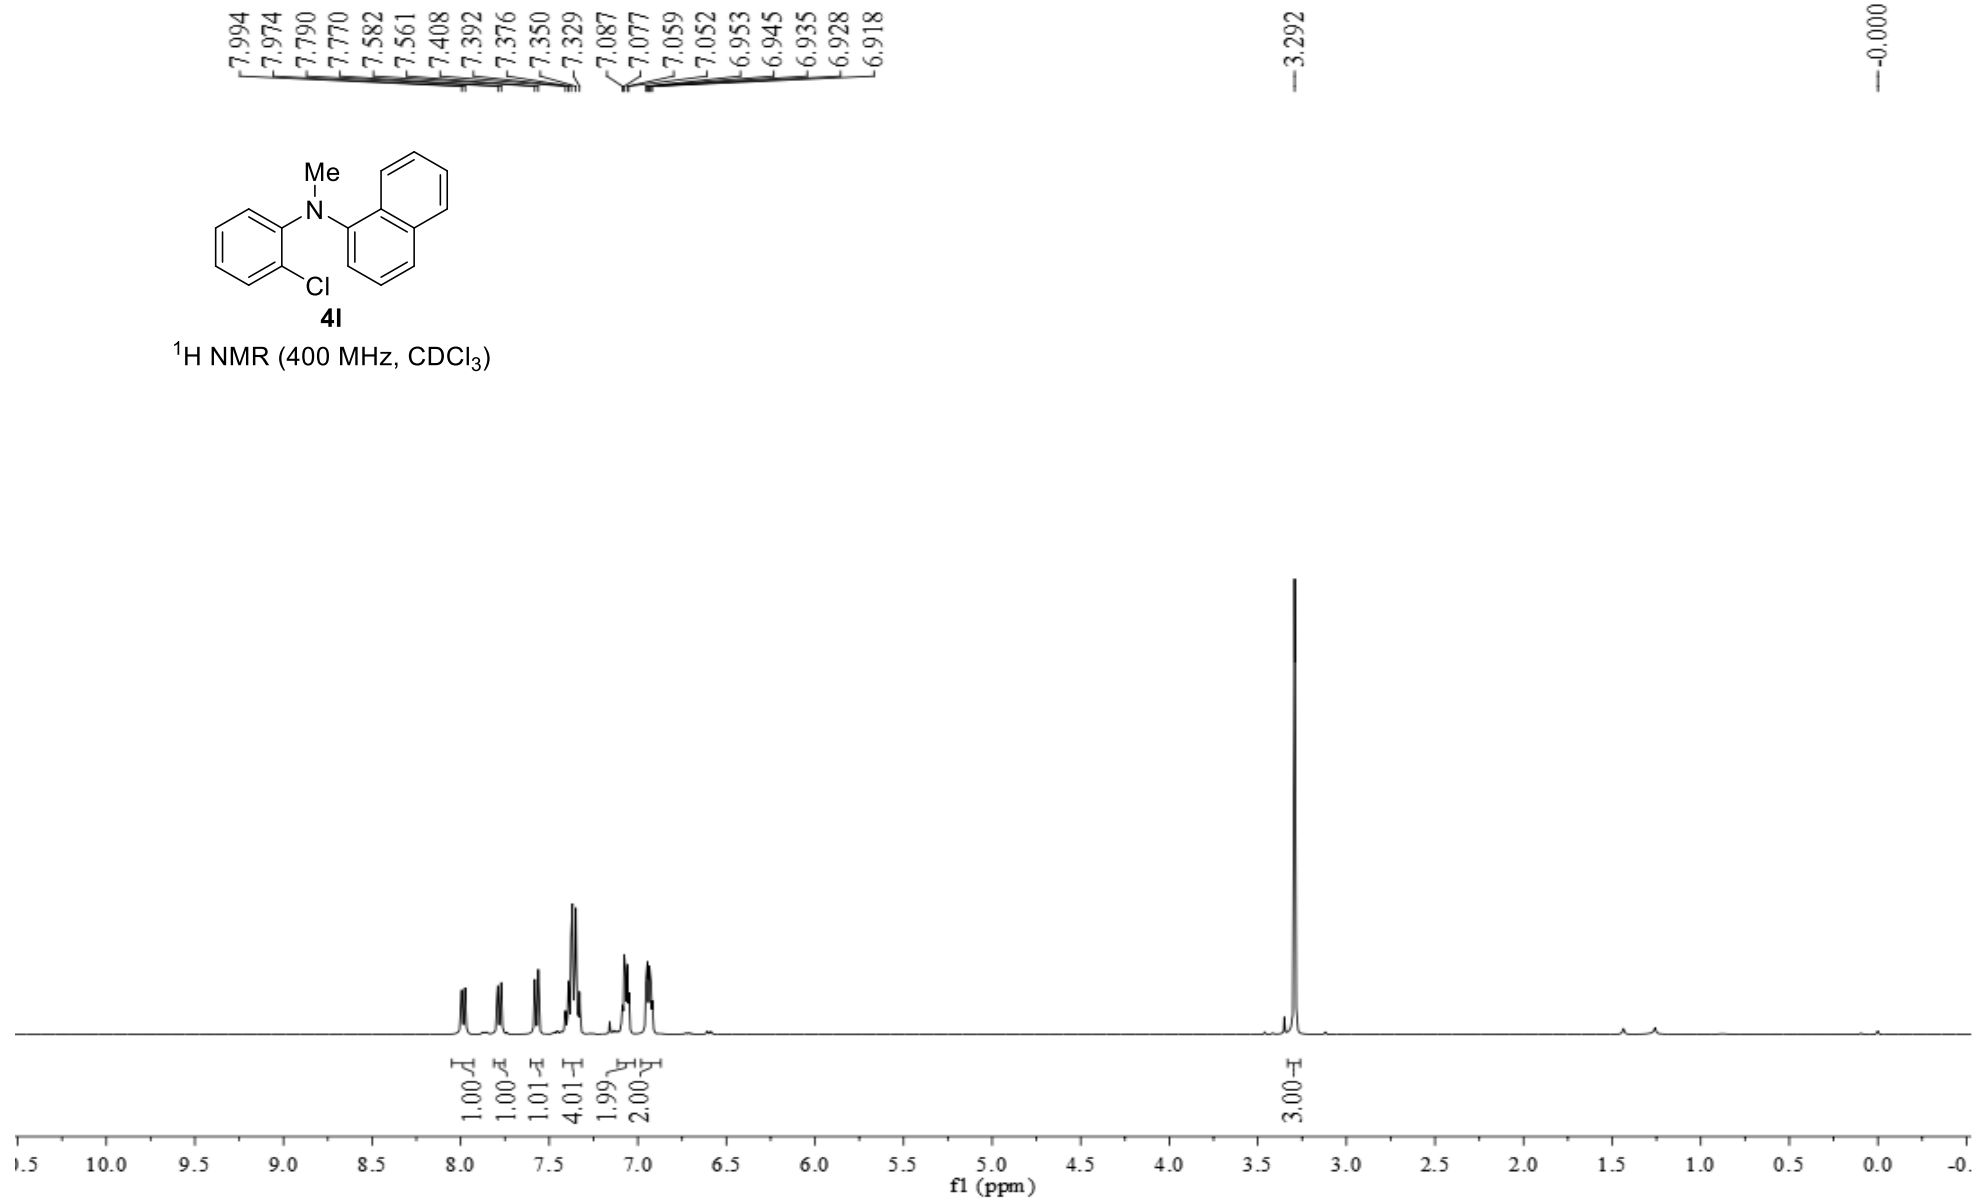

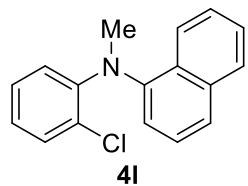

<sup>13</sup>C NMR (100 MHz, CDCl<sub>3</sub>)

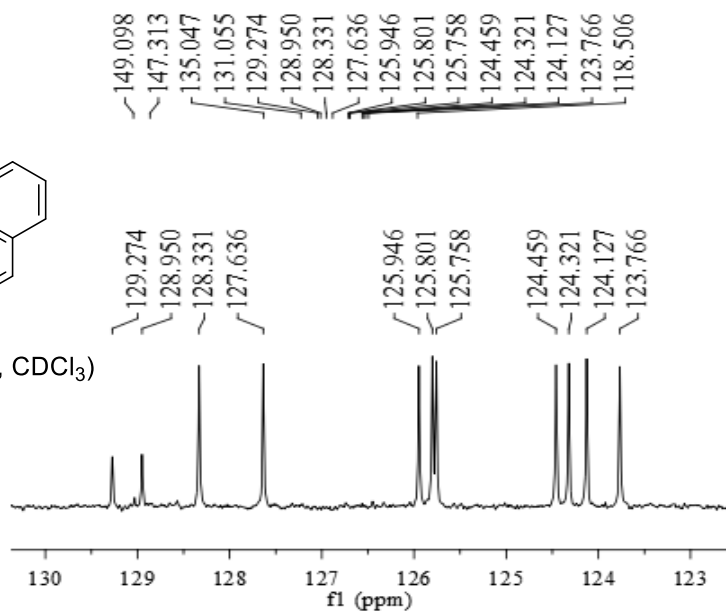

149.098  
147.313  
135.047  
131.055  
129.274  
128.950  
128.331  
127.636  
125.946  
125.801  
125.758  
124.459  
124.321  
124.127  
123.766  
118.506

77.477  
77.160  
76.842

42.018

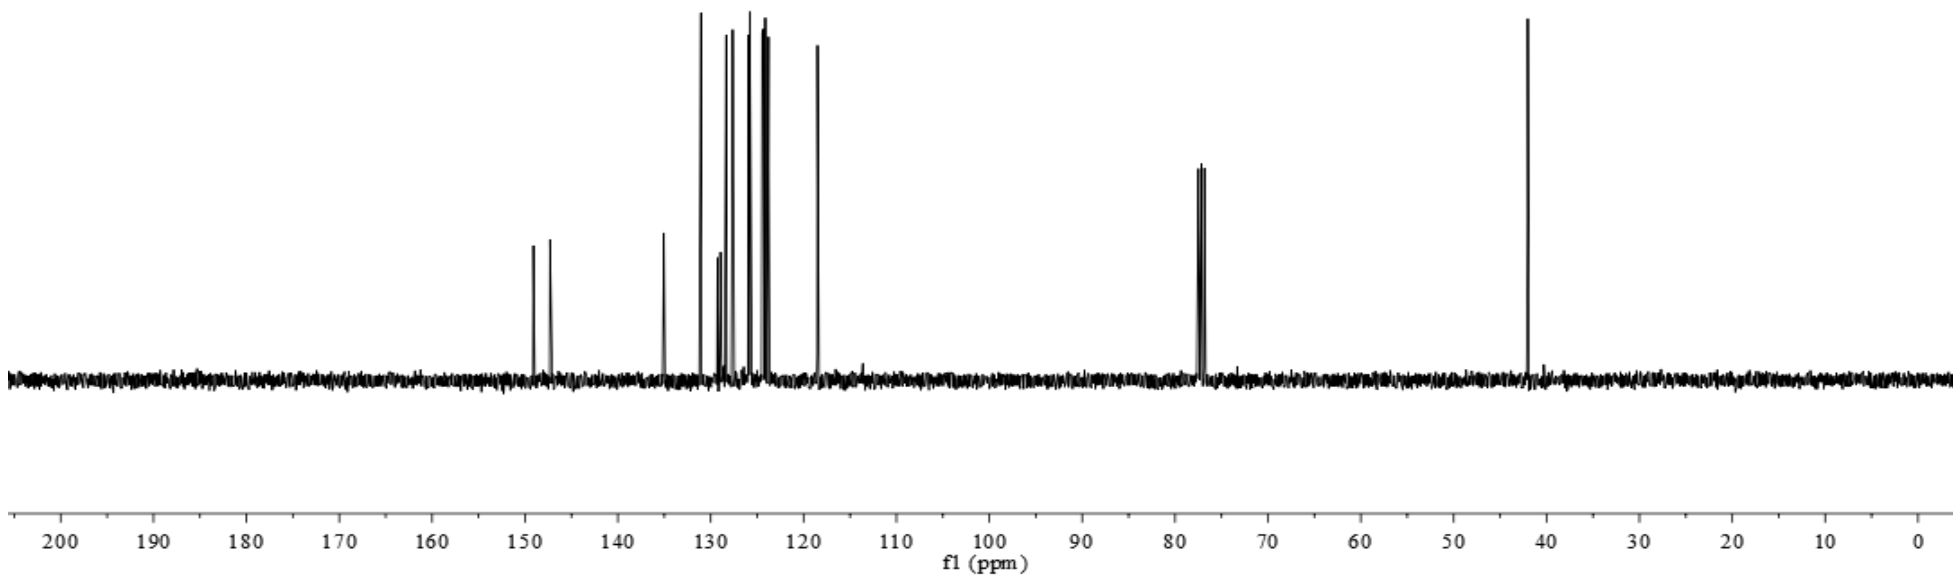

7.359  
7.355  
7.339  
7.335  
7.279  
7.275  
7.261  
7.243  
7.202  
7.198  
7.179  
7.172  
7.167  
7.164  
7.160  
7.150  
7.057  
7.053  
7.036  
7.033  
6.954  
6.951  
6.935  
6.932  
6.917  
6.913

3.062  
3.043  
3.024  
2.765  
2.663  
2.644  
2.625  
1.924  
1.909  
1.905  
1.902  
1.892  
1.886  
1.881  
1.871  
1.867  
1.848  
-0.000

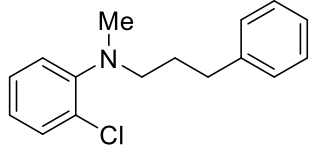

**4m**

<sup>1</sup>H NMR (400 MHz, CDCl<sub>3</sub>)

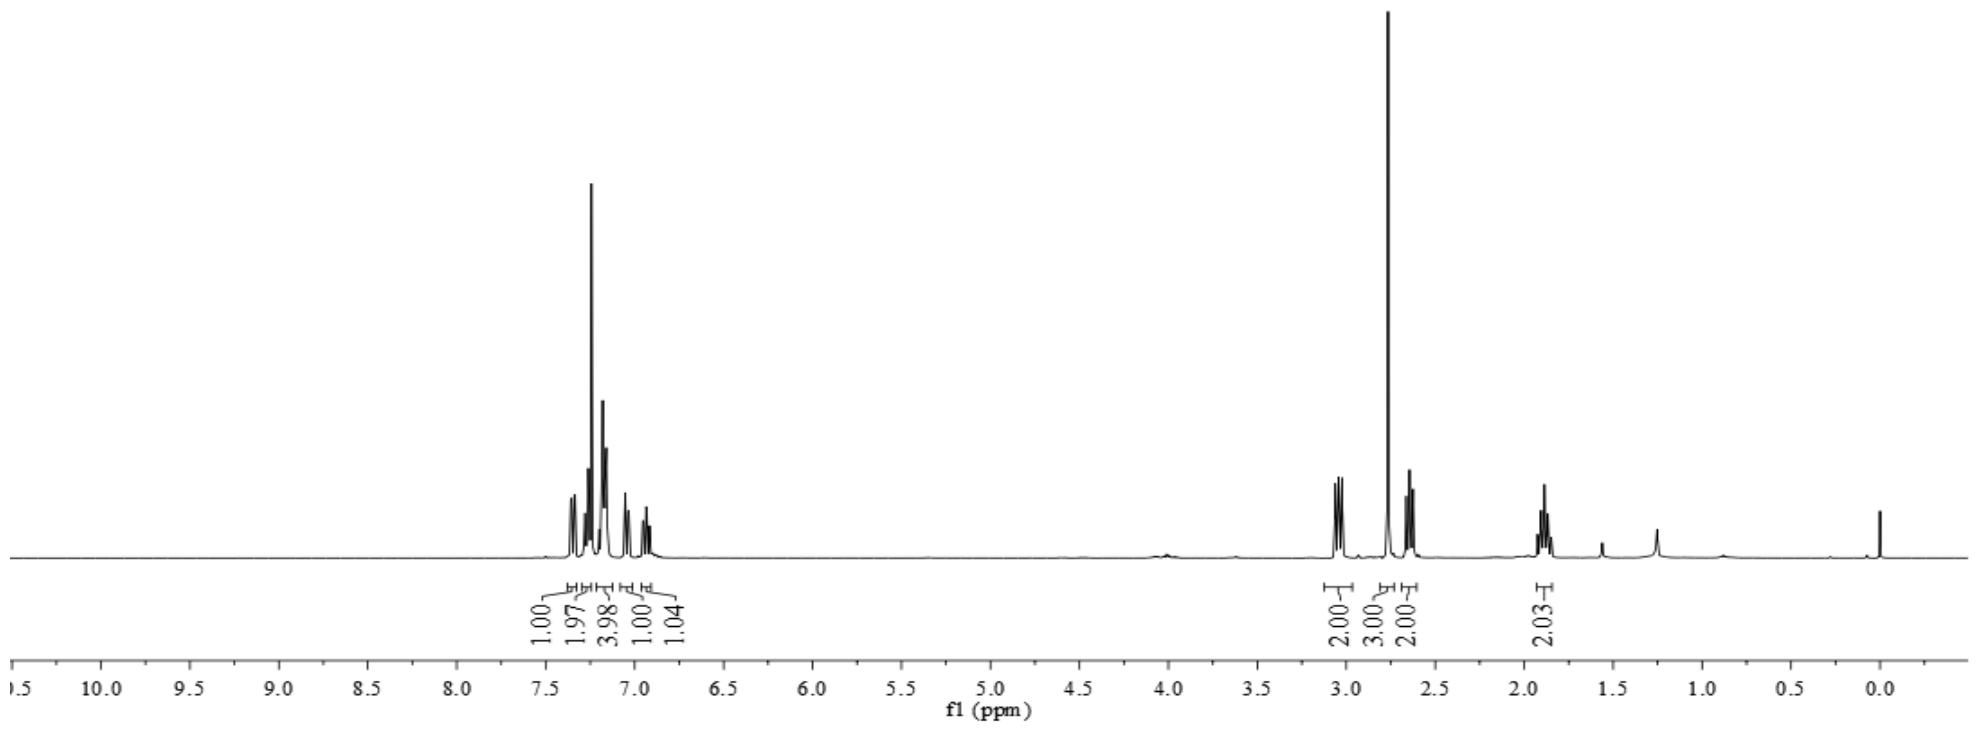

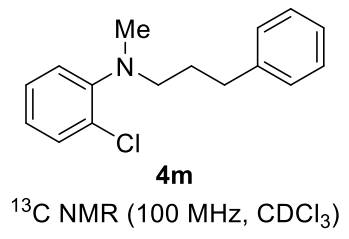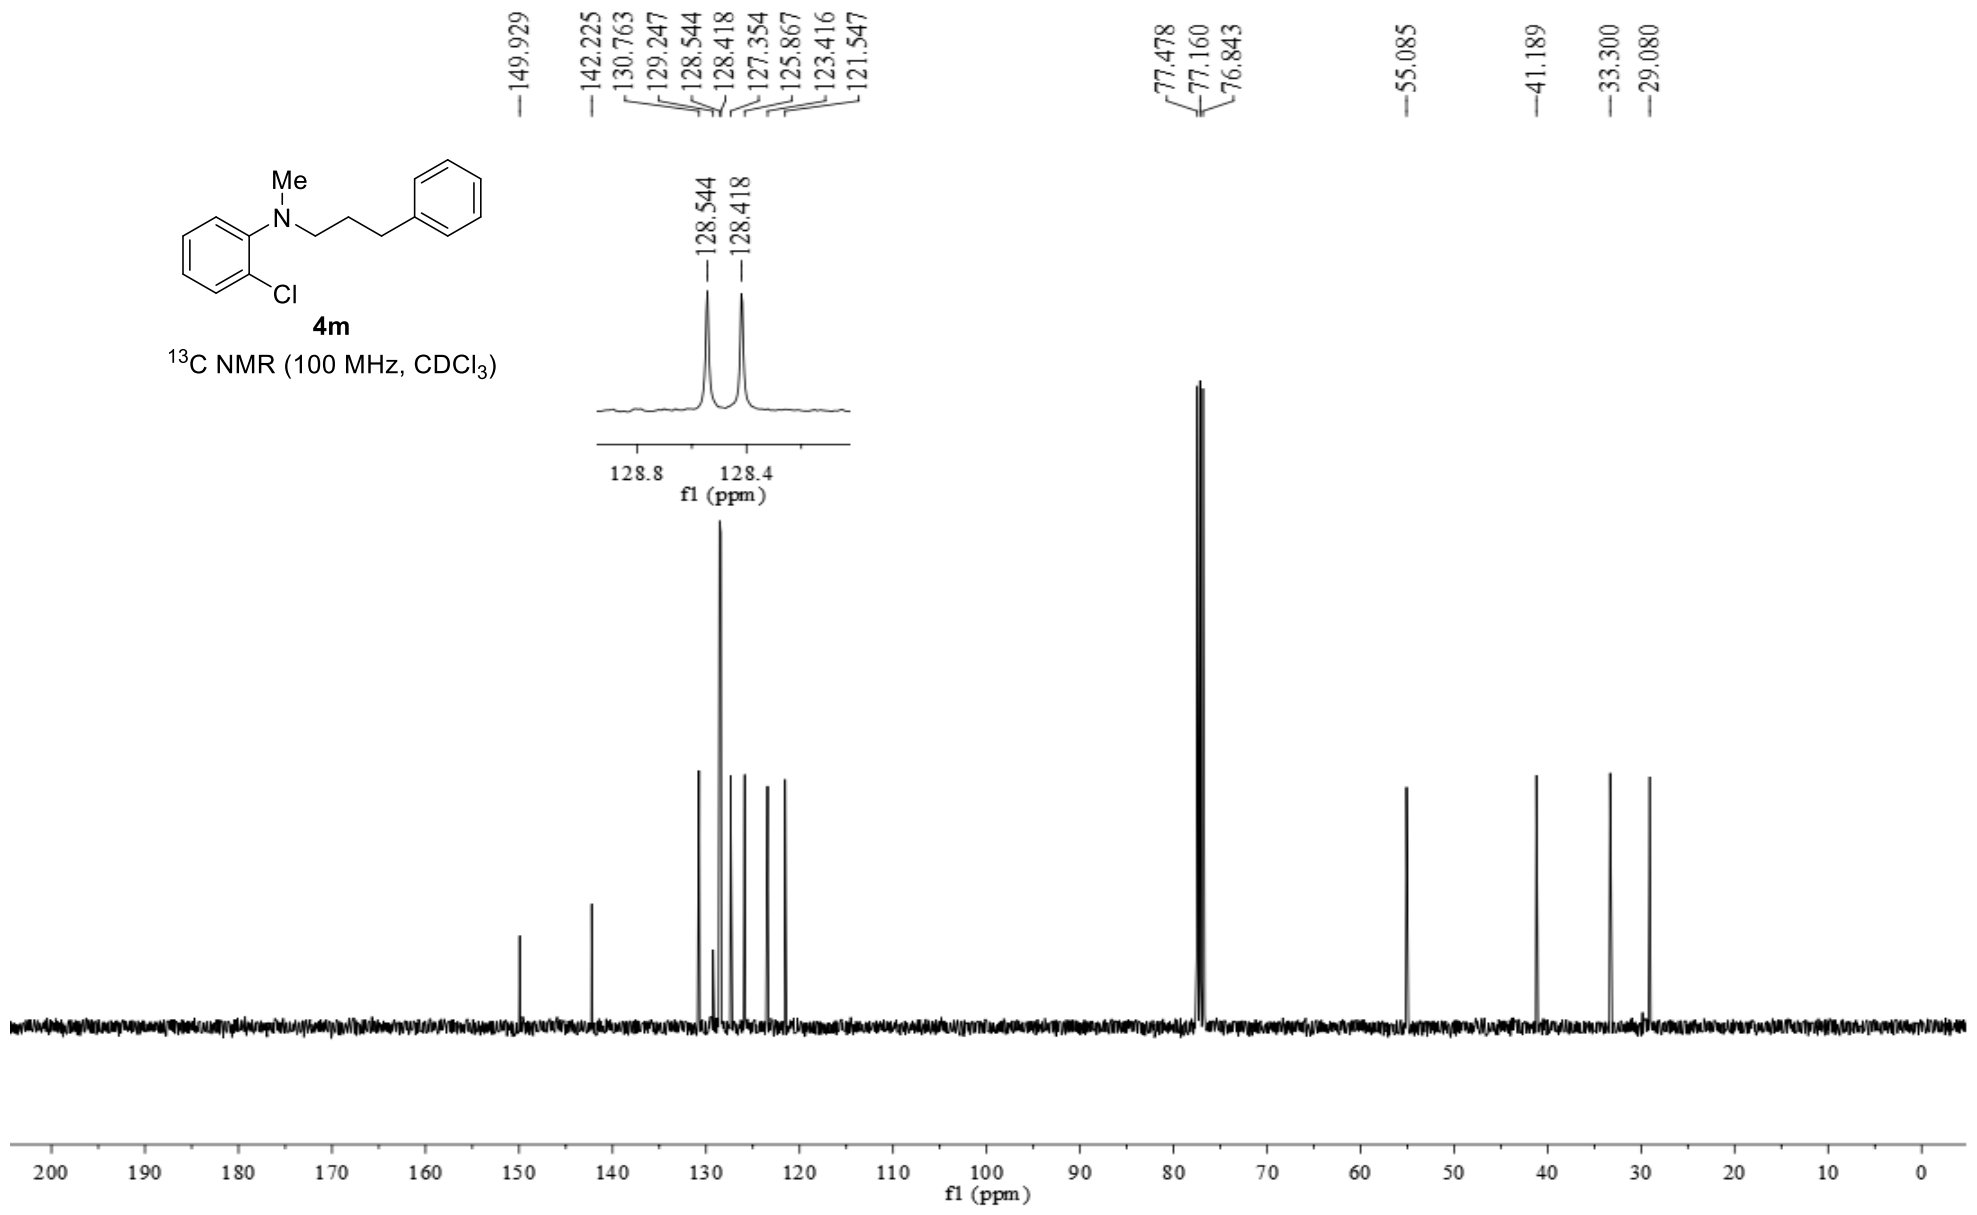

7.350  
7.346  
7.330  
7.327  
7.242  
7.187  
7.183  
7.169  
7.167  
7.165  
7.163  
7.149  
7.145  
7.070  
7.066  
7.050  
7.046  
6.925  
6.921  
6.905  
6.903  
6.902  
6.887  
6.883  
3.170  
3.149  
3.141  
3.133  
3.112  
2.701  
1.798  
1.790  
1.783  
1.766  
1.758  
1.623  
1.620  
1.600  
1.596  
1.592  
1.588  
1.467  
1.458  
1.437  
1.428  
1.282  
1.256  
1.250  
1.241  
1.225  
1.217  
1.209  
1.185  
1.133  
1.110  
1.101  
1.093  
1.070

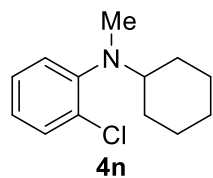

$^1\text{H}$  NMR (400 MHz,  $\text{CDCl}_3$ )

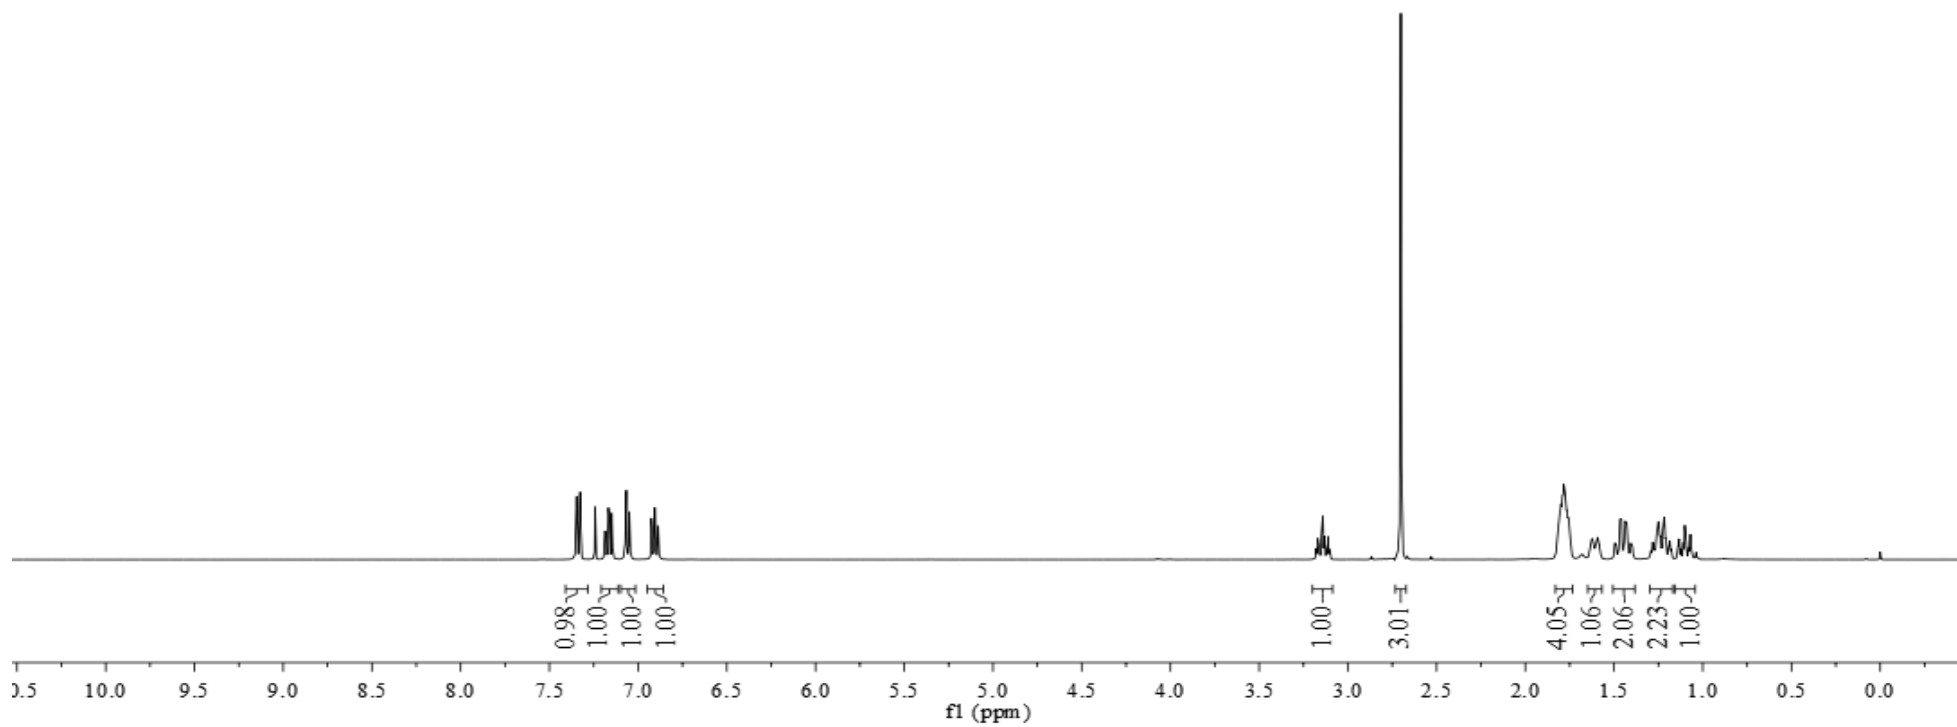

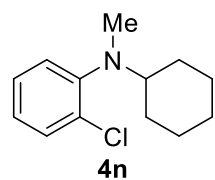

$^{13}\text{C}$  NMR (100 MHz,  $\text{CDCl}_3$ )

—150.027  
/ 130.726  
/ 129.448  
— 126.982  
/ 122.967  
/ 122.755  
/ 77.478  
/ 77.160  
/ 76.842  
—61.551  
/ 33.805  
/ 29.159  
/ 26.200  
/ 26.105

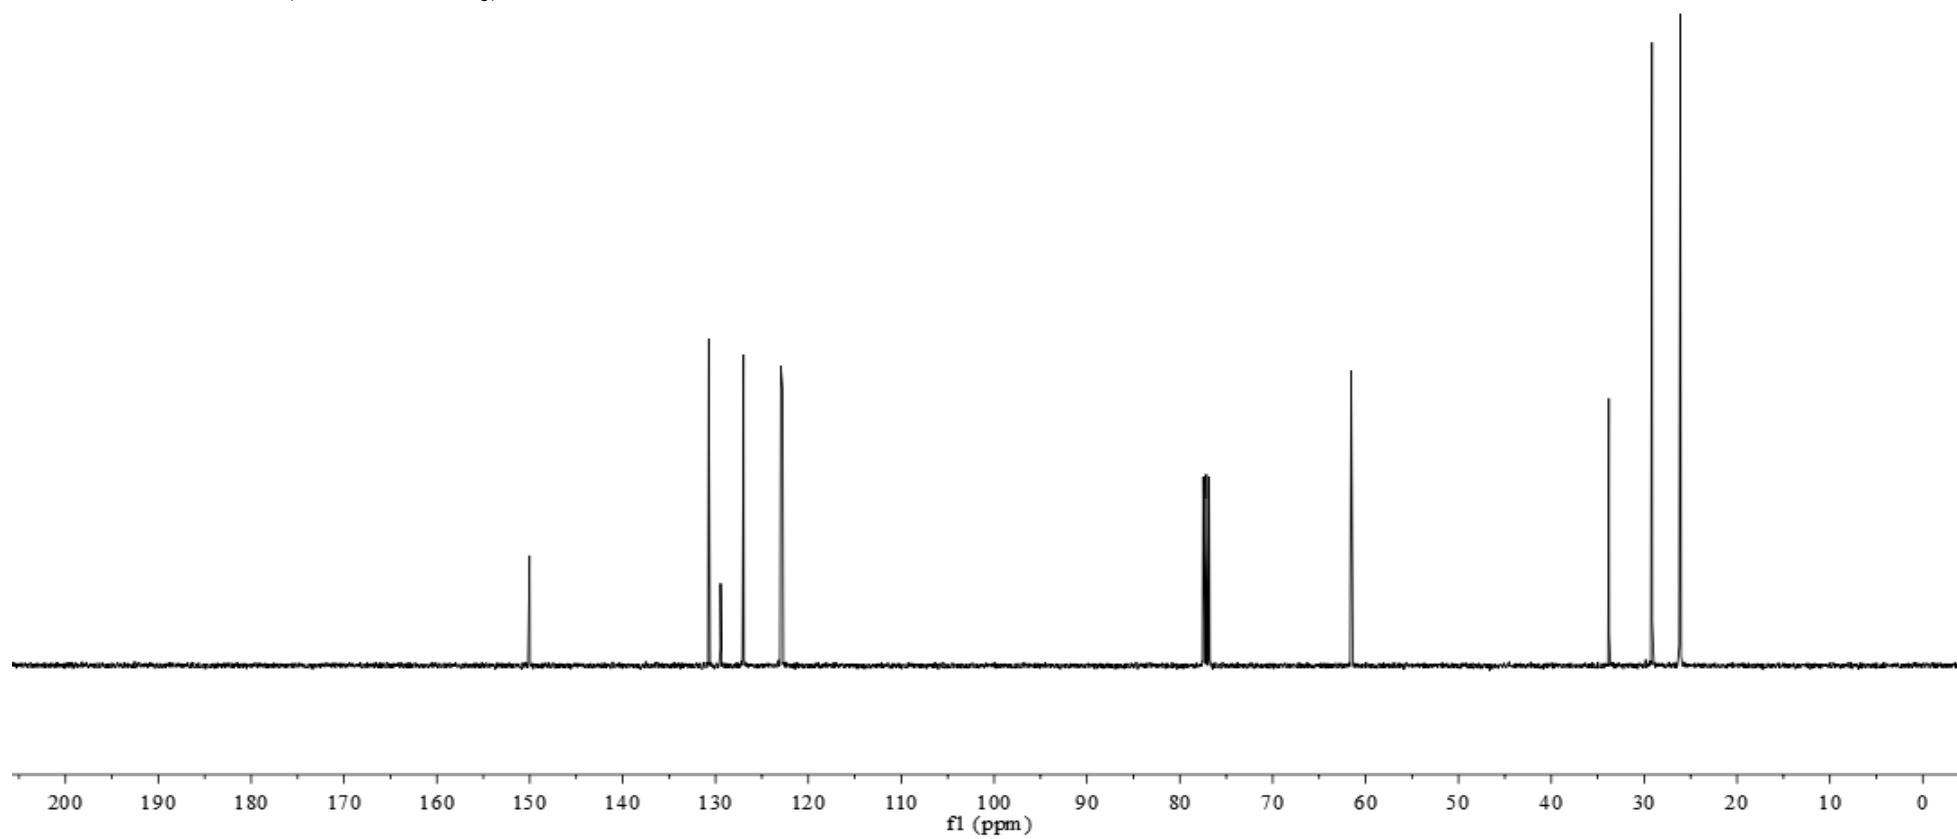



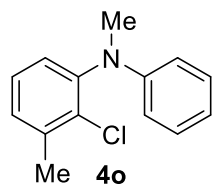

<sup>1</sup>H NMR (400 MHz, CDCl<sub>3</sub>)

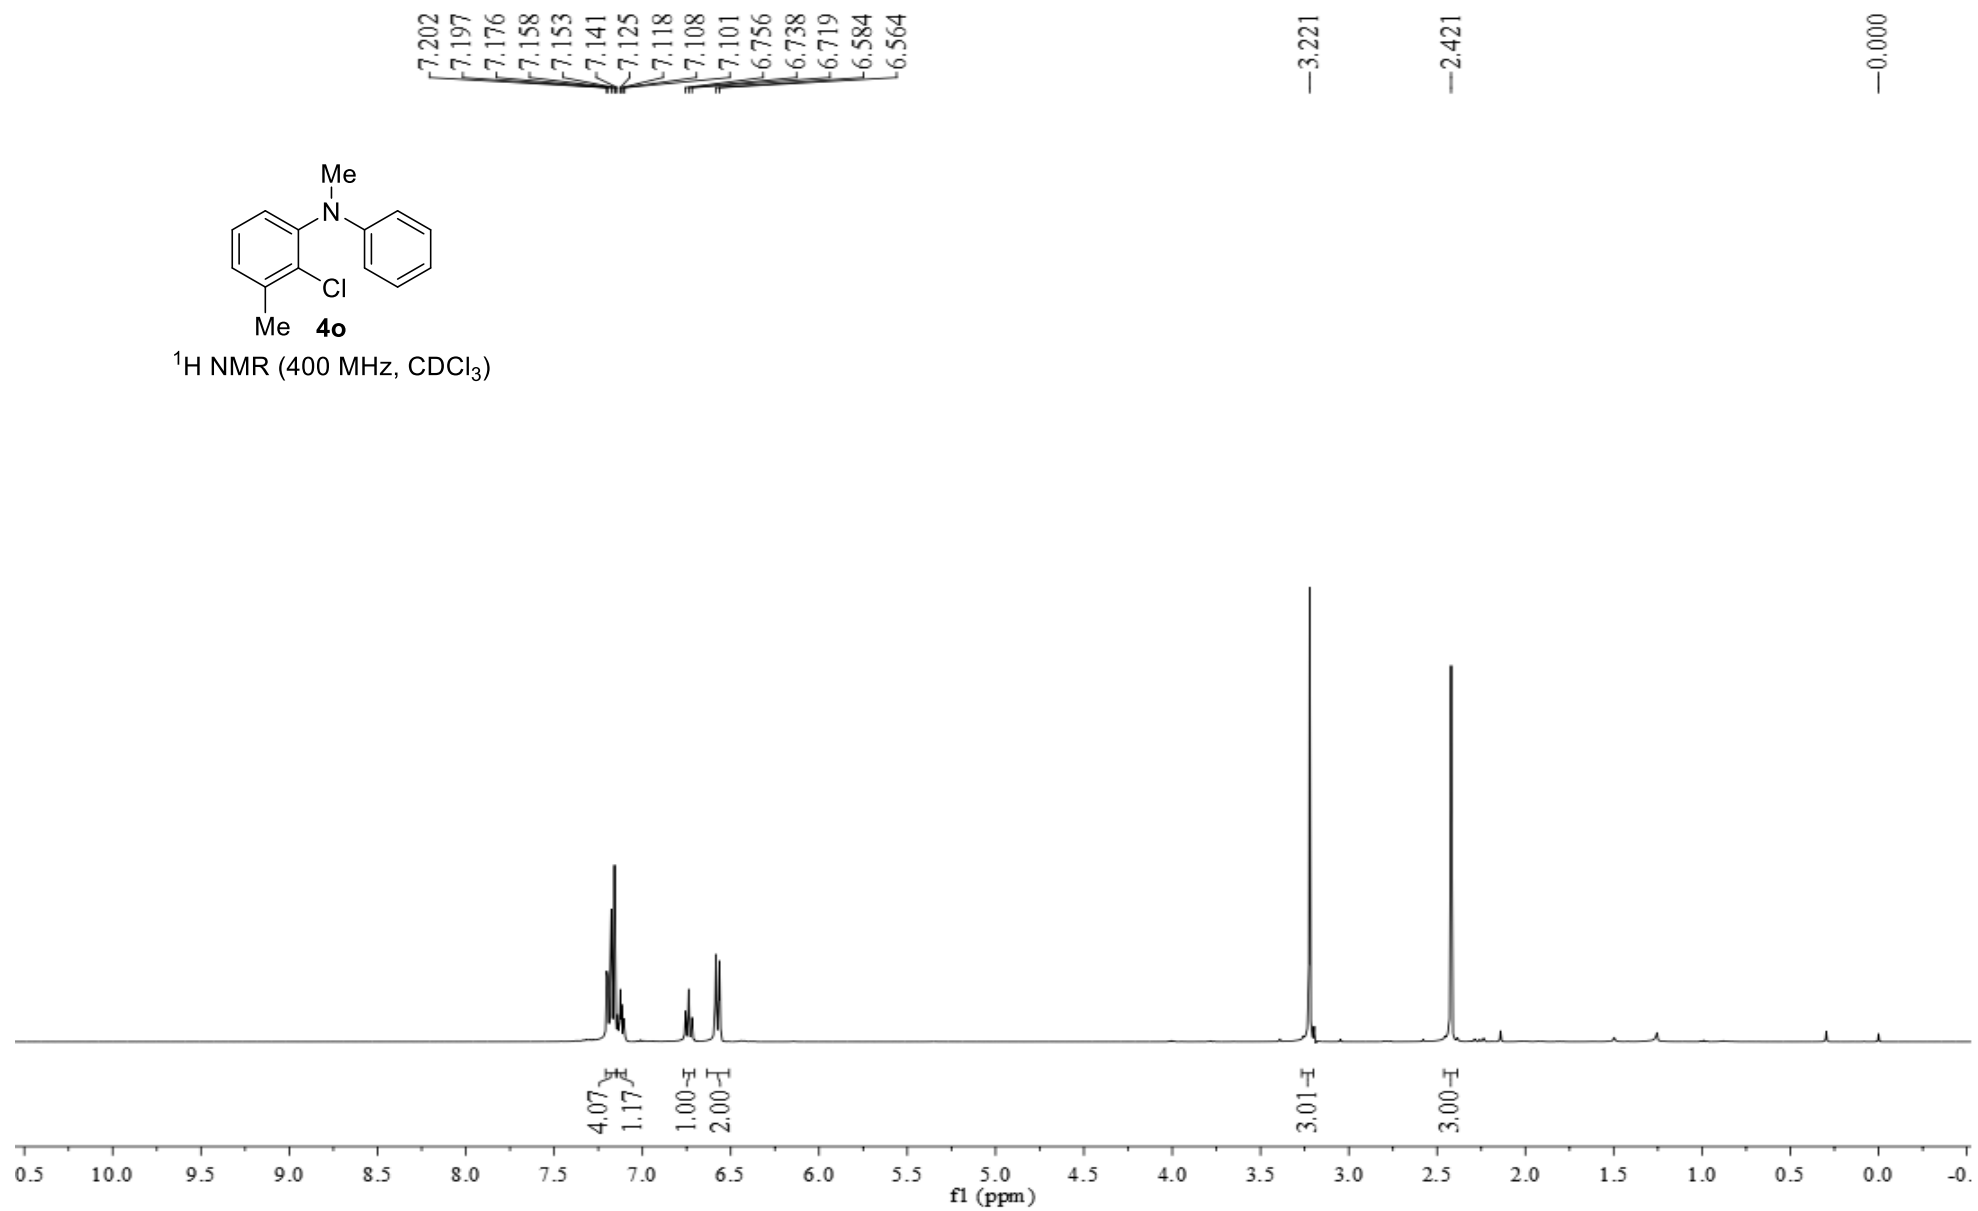

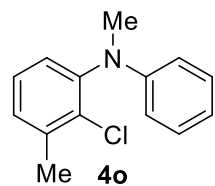

$^{13}\text{C}$  NMR (100 MHz,  $\text{CDCl}_3$ )

148.792  
145.483  
138.513  
134.151  
129.032  
128.857  
127.751  
127.427  
—117.550  
—113.248

77.478  
77.160  
76.842

—38.952

—20.892

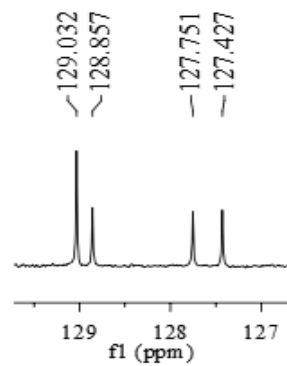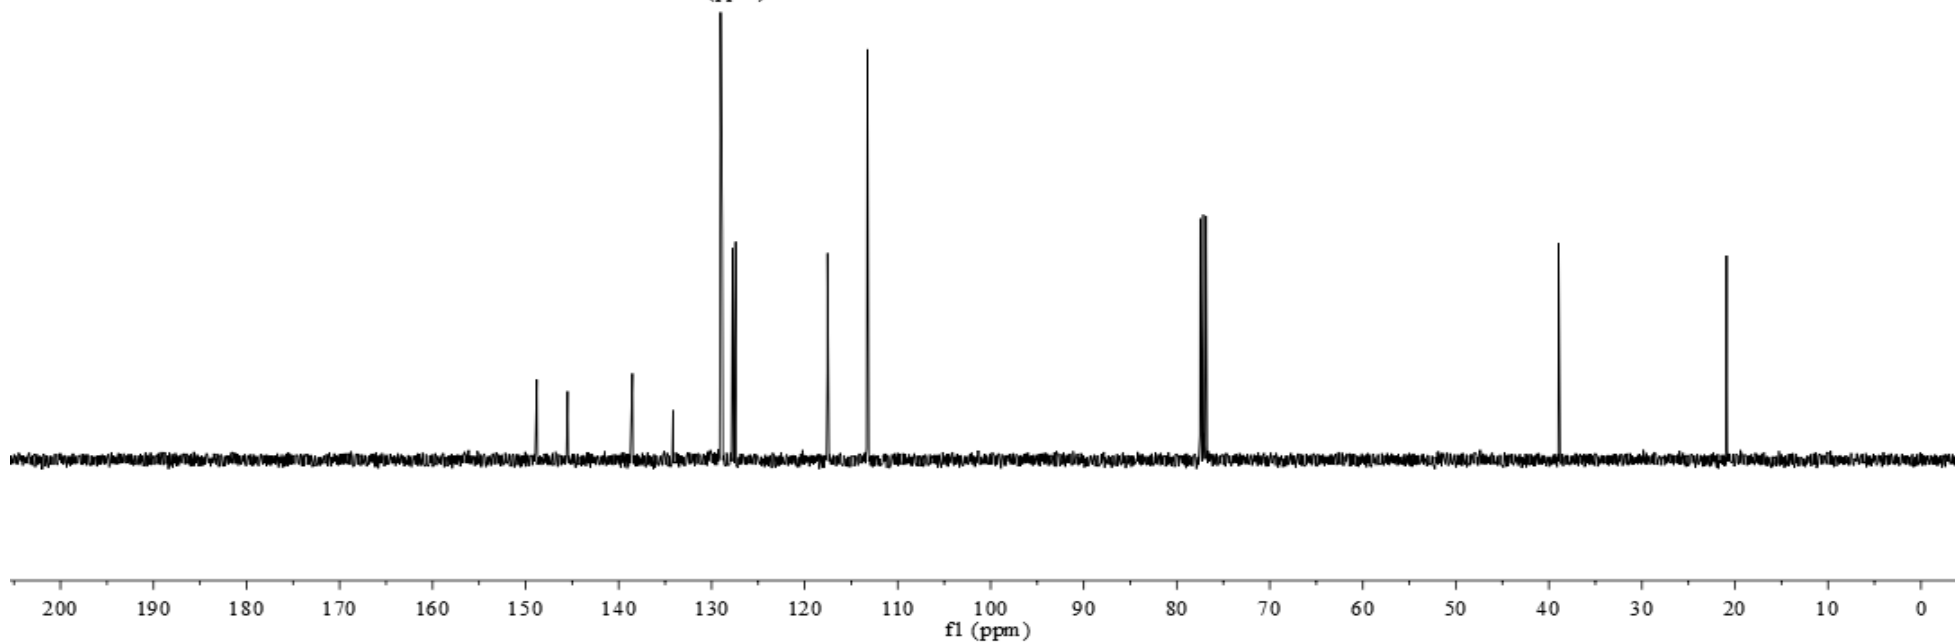

7.359  
7.338  
7.304  
7.301  
7.233  
7.210  
7.200  
7.192  
7.188  
7.182  
7.179  
7.170  
7.160  
7.138  
7.098  
7.094  
7.083  
7.079  
7.022  
7.017  
7.001  
6.997  
6.773  
6.755  
6.740  
6.722  
6.607  
6.588  
6.568

3.227  
3.217

2.351  
2.300

-0.000

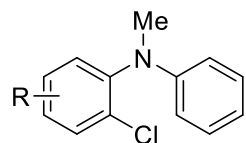

**4p/4p'**, R = 5-Me/4-Me, 55:45  
<sup>1</sup>H NMR (400 MHz, CDCl<sub>3</sub>)

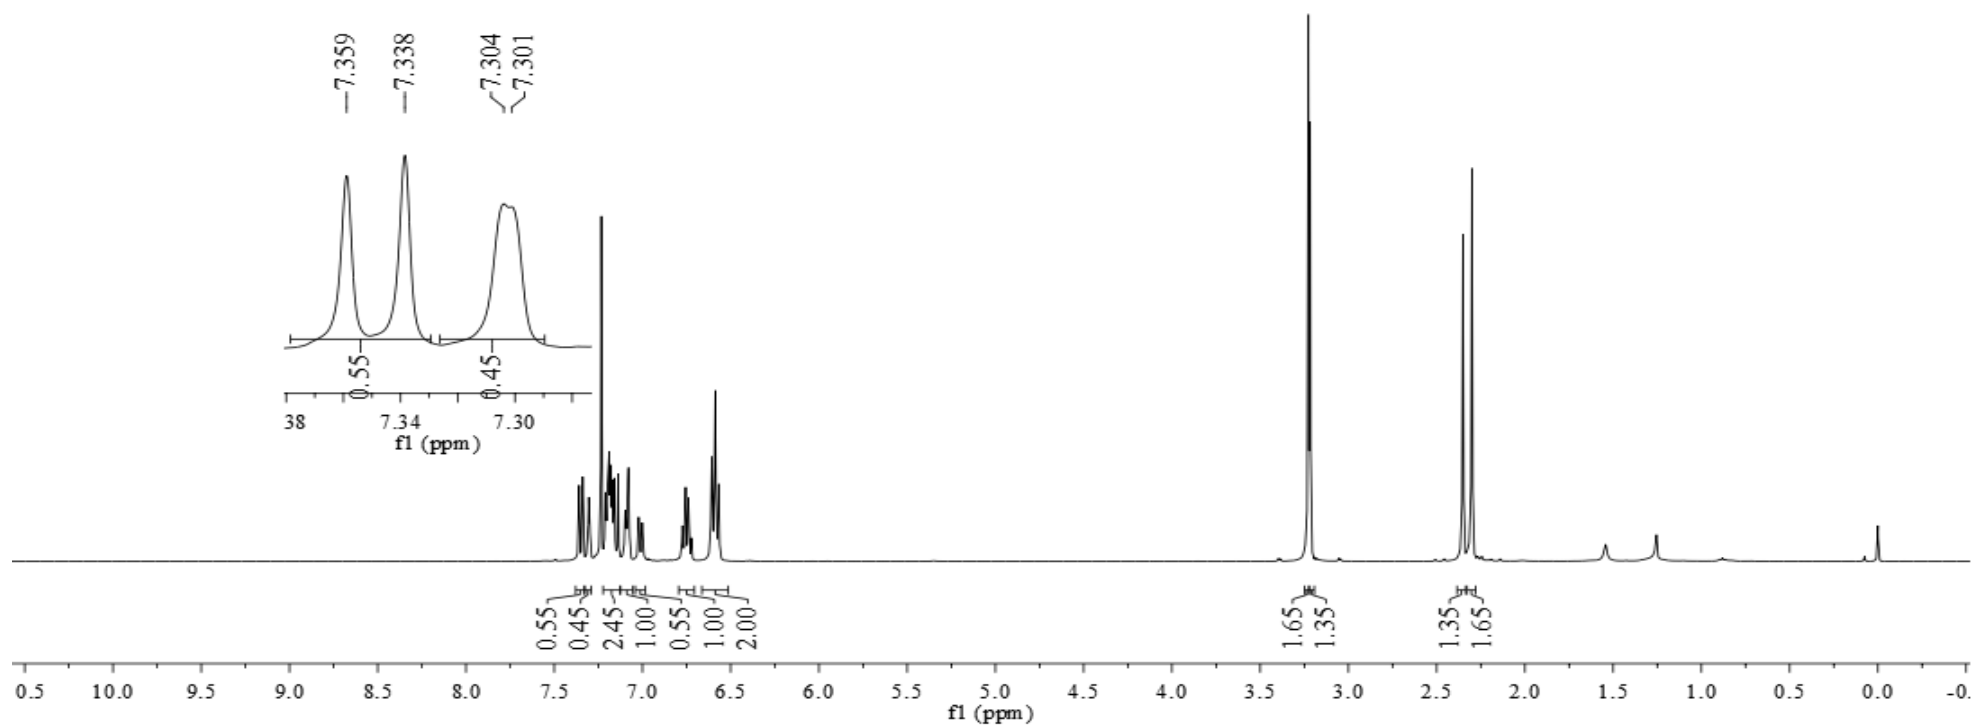

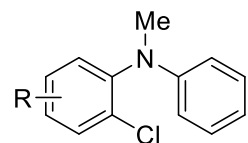

**4p/4p'**, R = 5-Me/4-Me, 55:45  
<sup>13</sup>C NMR (100 MHz, CDCl<sub>3</sub>)

148.854  
 148.755  
 145.017  
 142.659  
 138.433  
 137.787  
 133.406  
 131.387  
 130.748  
 130.600  
 130.453  
 130.048  
 129.092  
 129.045  
 128.303  
 117.744  
 117.574  
 113.516  
 113.272

77.478  
 77.160  
 76.843

39.059  
 39.046

20.944

131.387  
 130.748  
 130.600  
 130.453  
 130.048  
 129.092  
 129.045  
 128.303

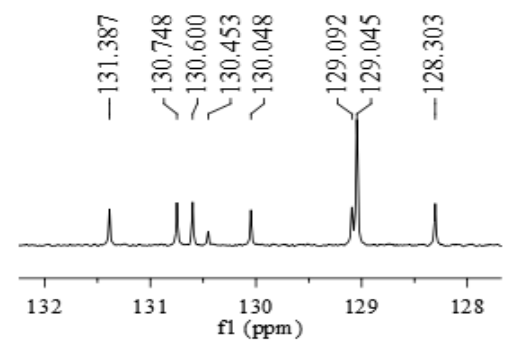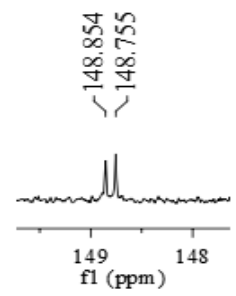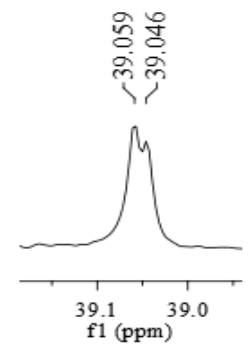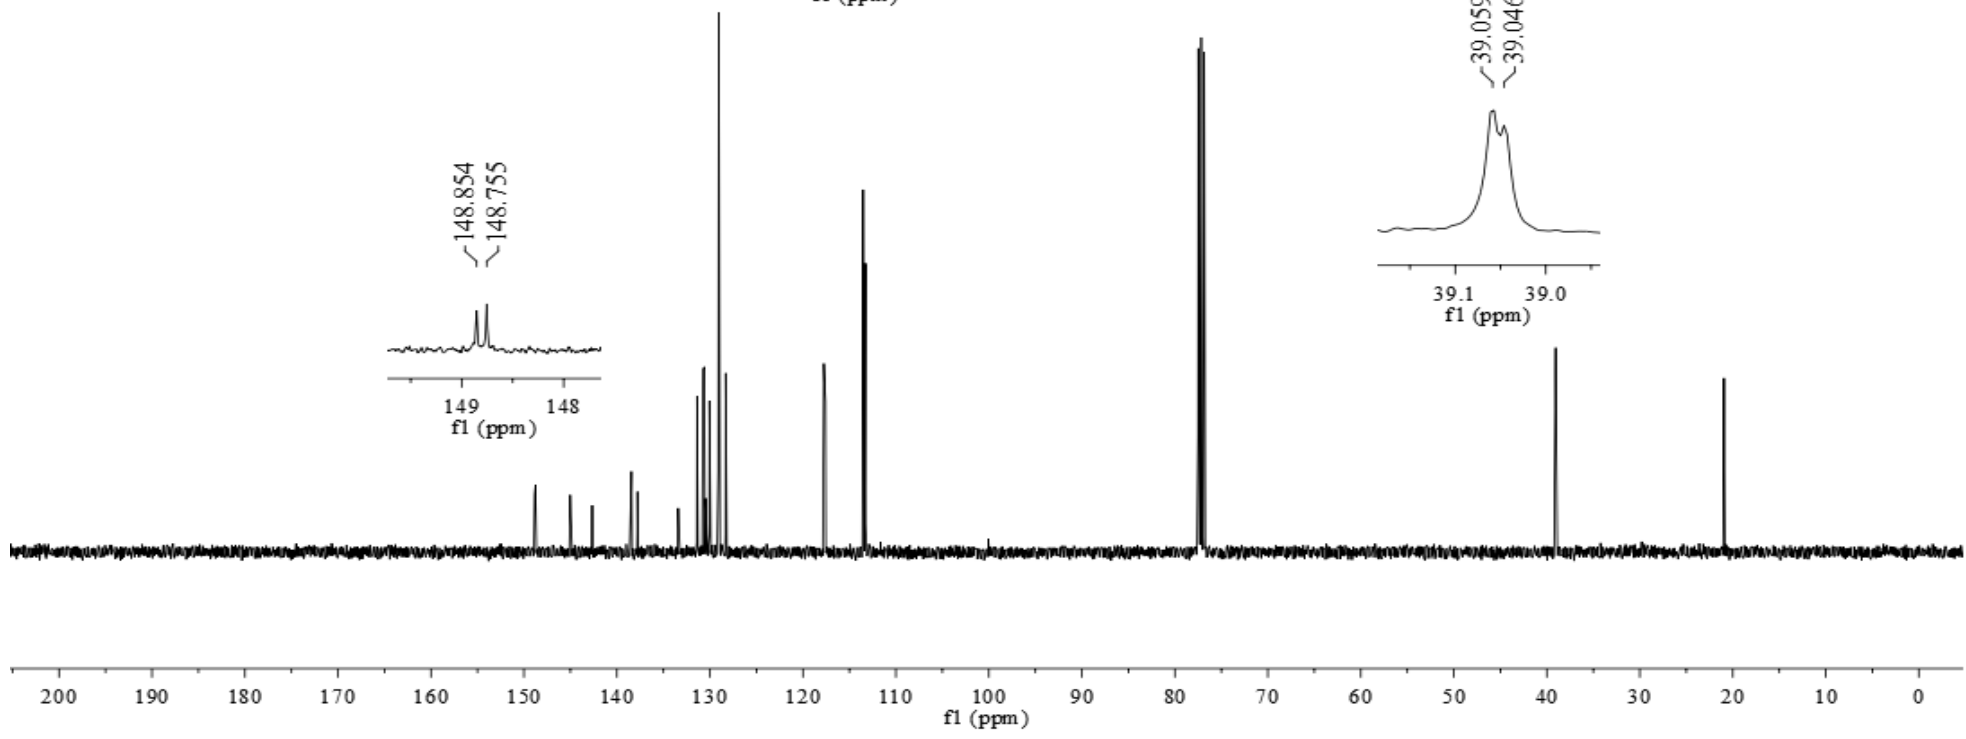

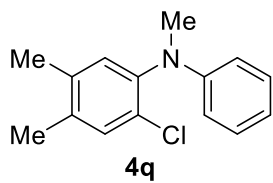

<sup>1</sup>H NMR (400 MHz, CDCl<sub>3</sub>)

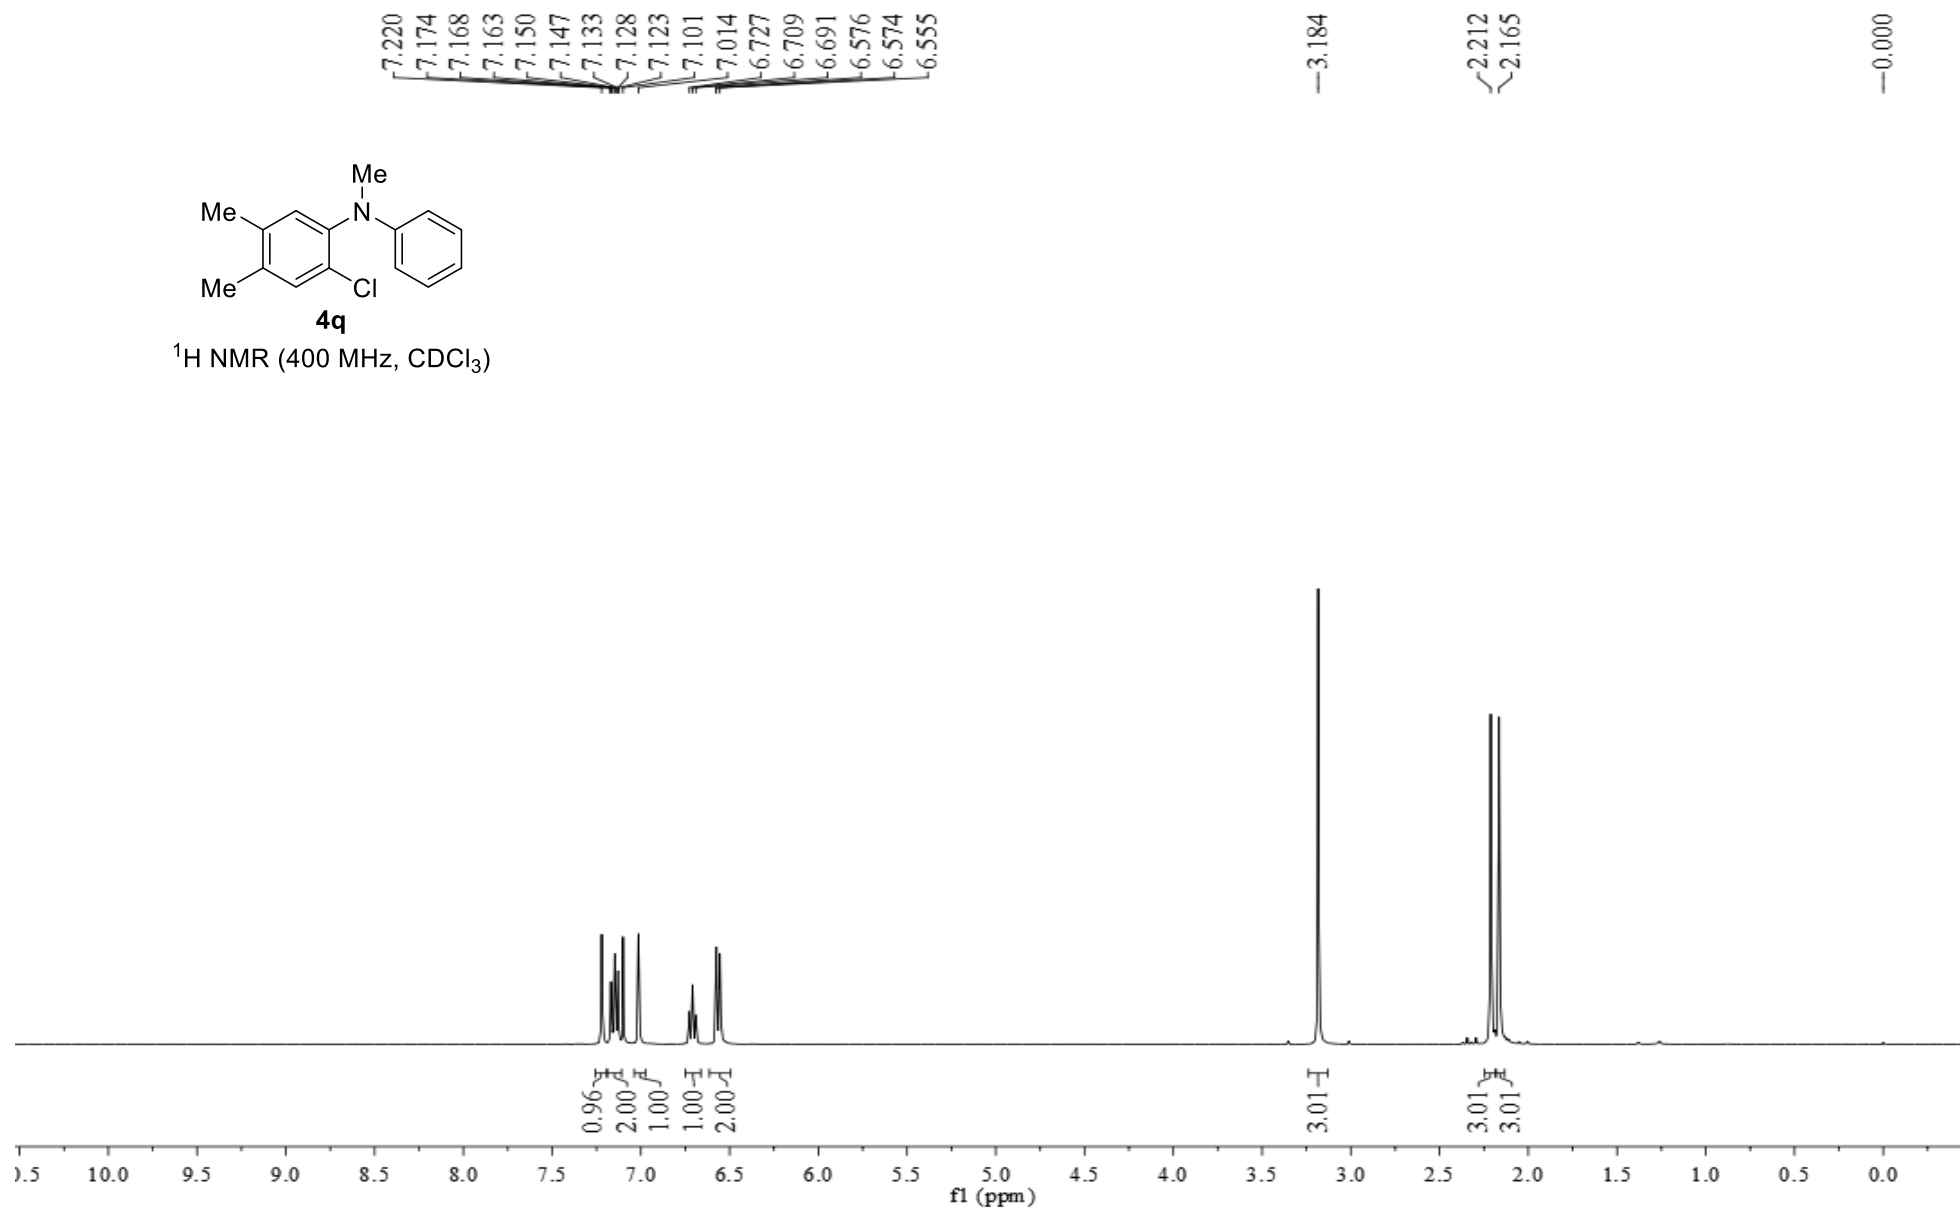

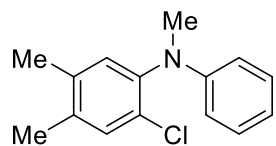

**4q**

$^{13}\text{C}$  NMR (100 MHz,  $\text{CDCl}_3$ )

148.877  
142.619  
136.883  
136.374  
131.472  
131.060  
130.328  
128.966  
117.437  
113.222

77.477  
77.160  
76.842

38.977

19.315  
19.283

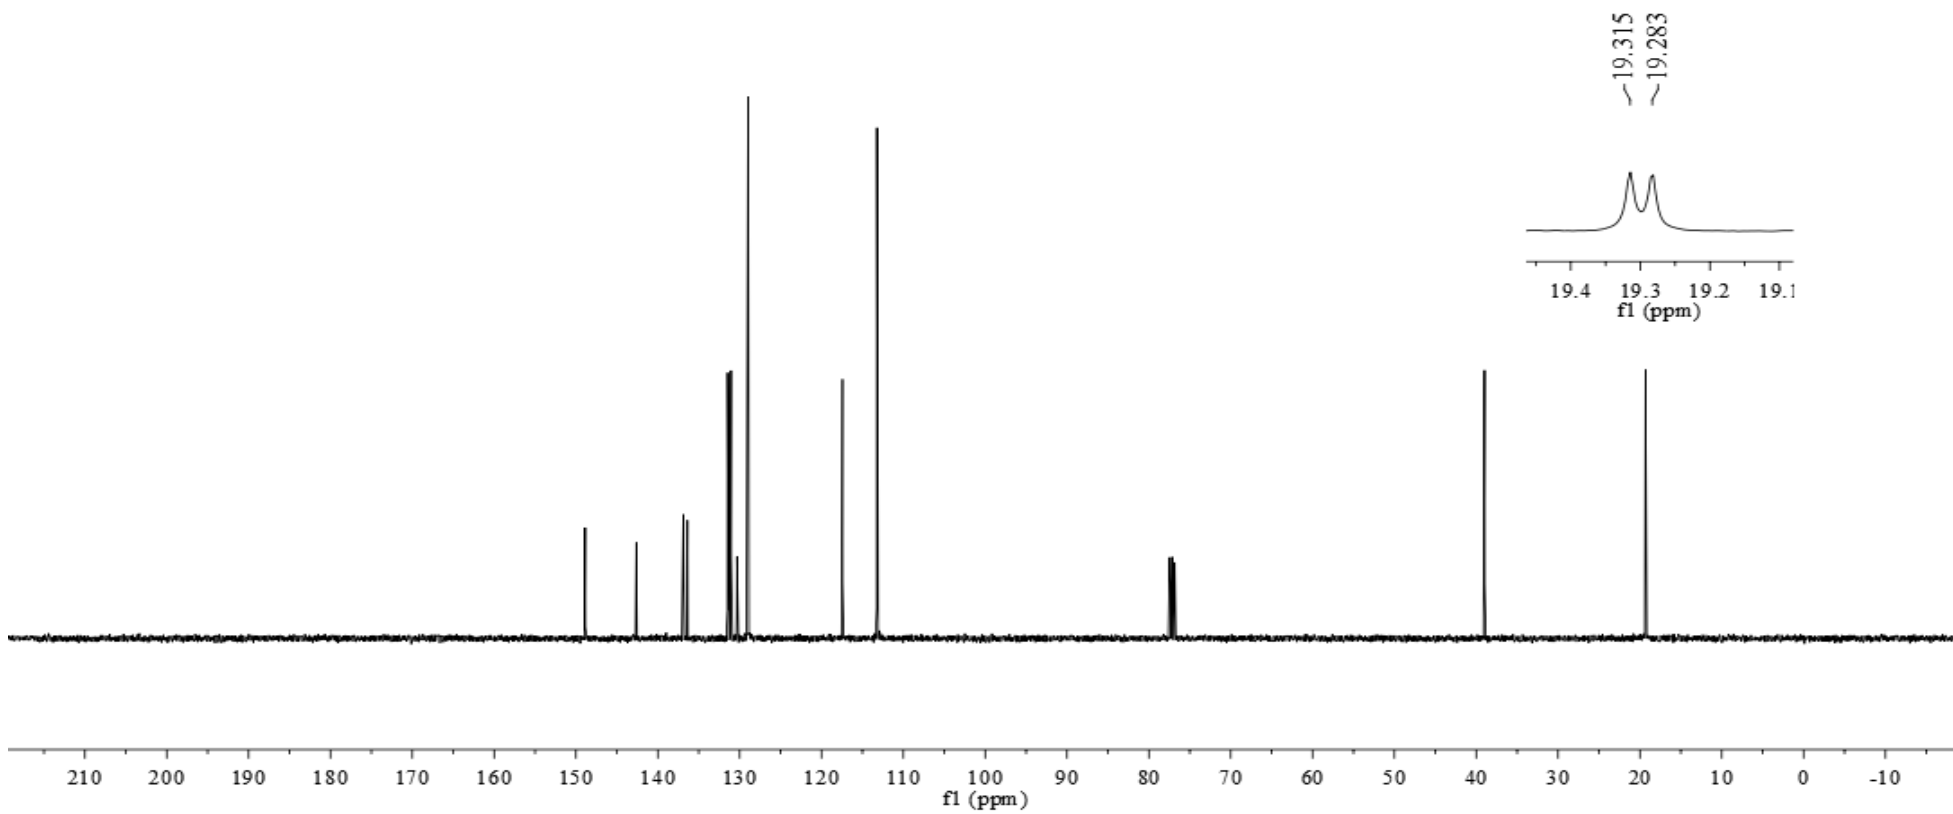

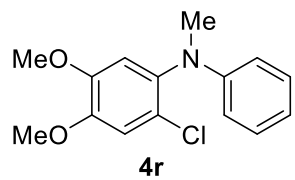

$^1\text{H NMR}$  (400 MHz,  $\text{CDCl}_3$ )

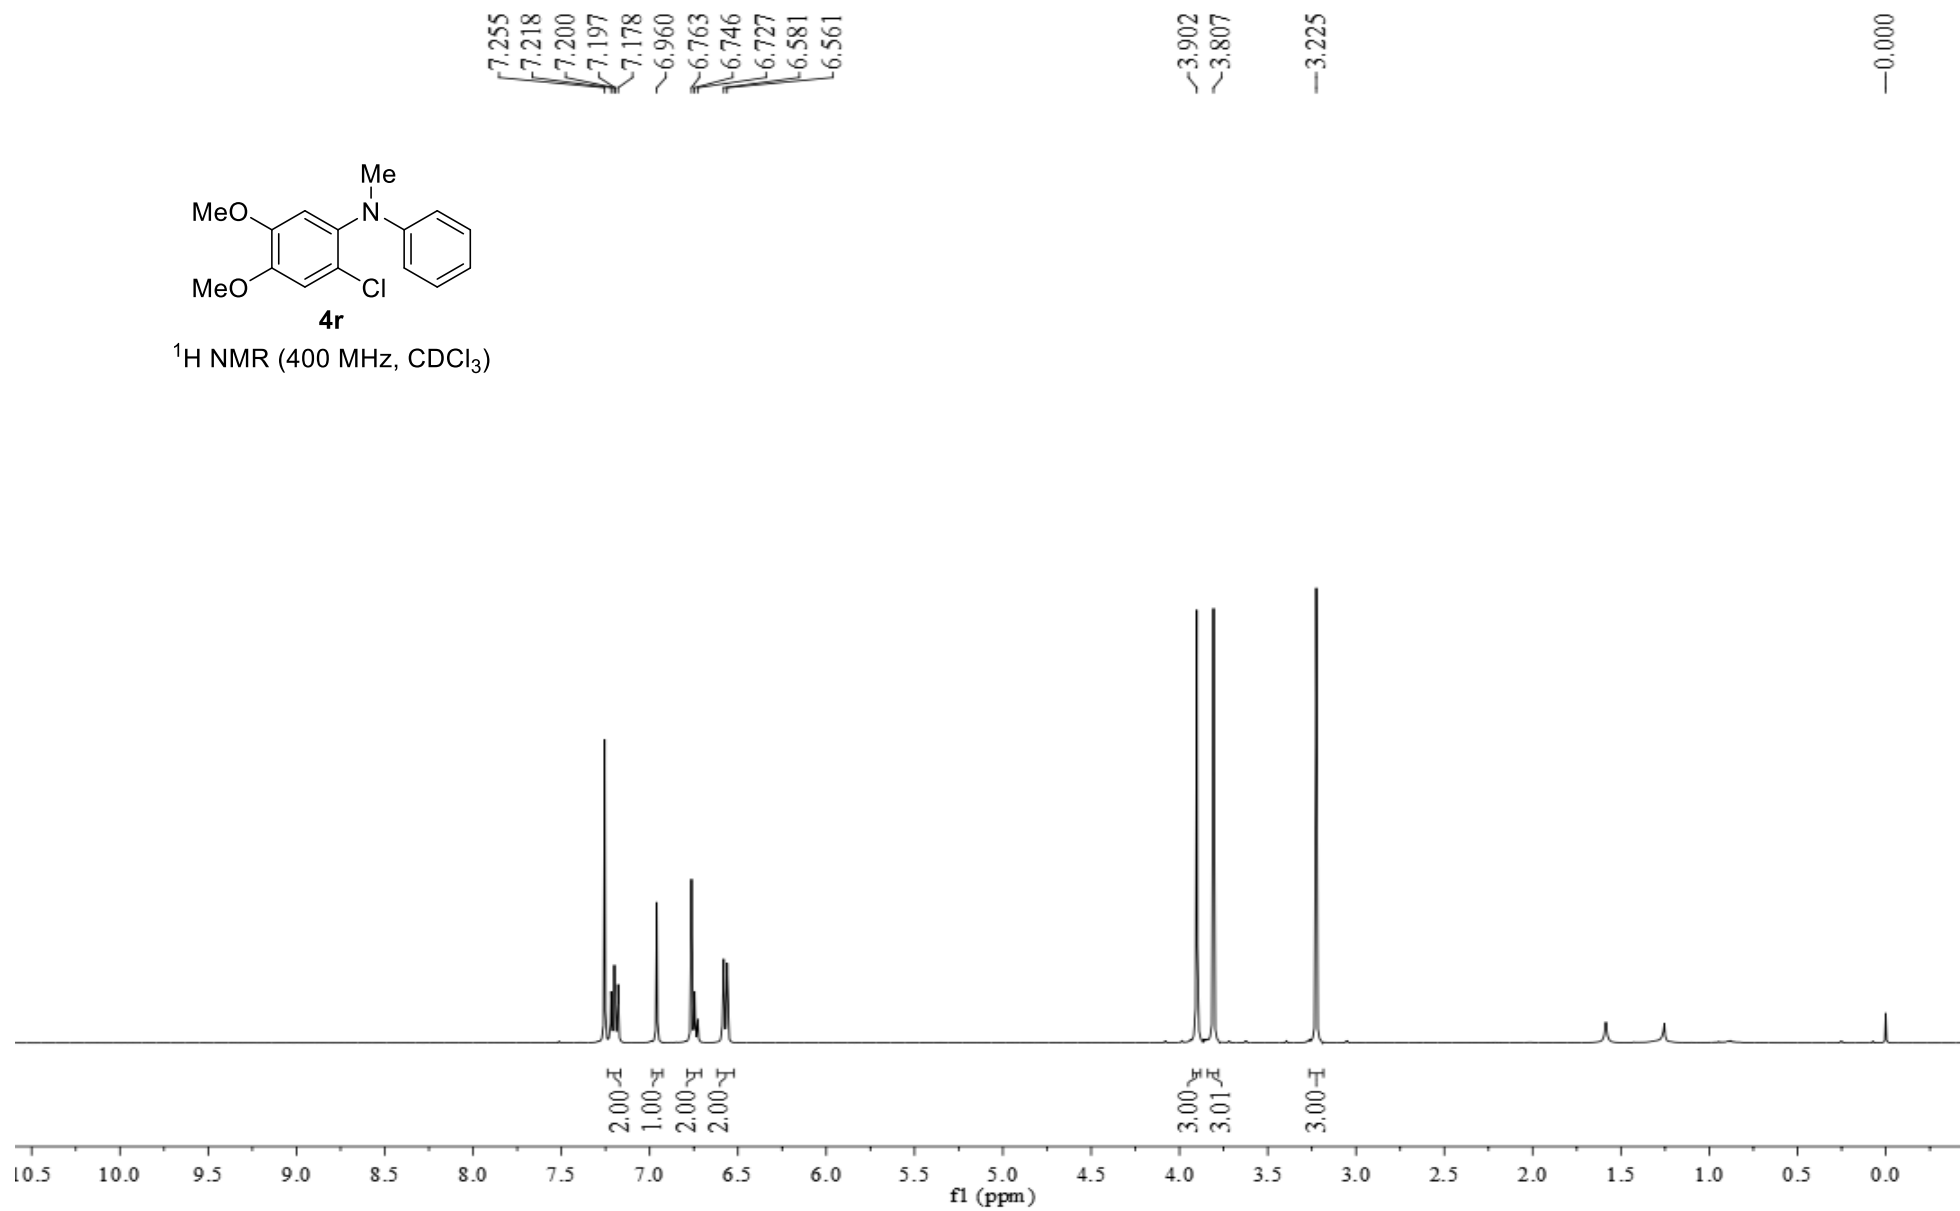

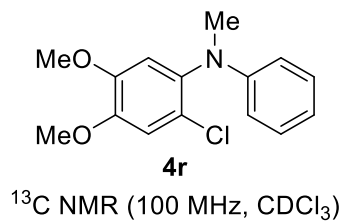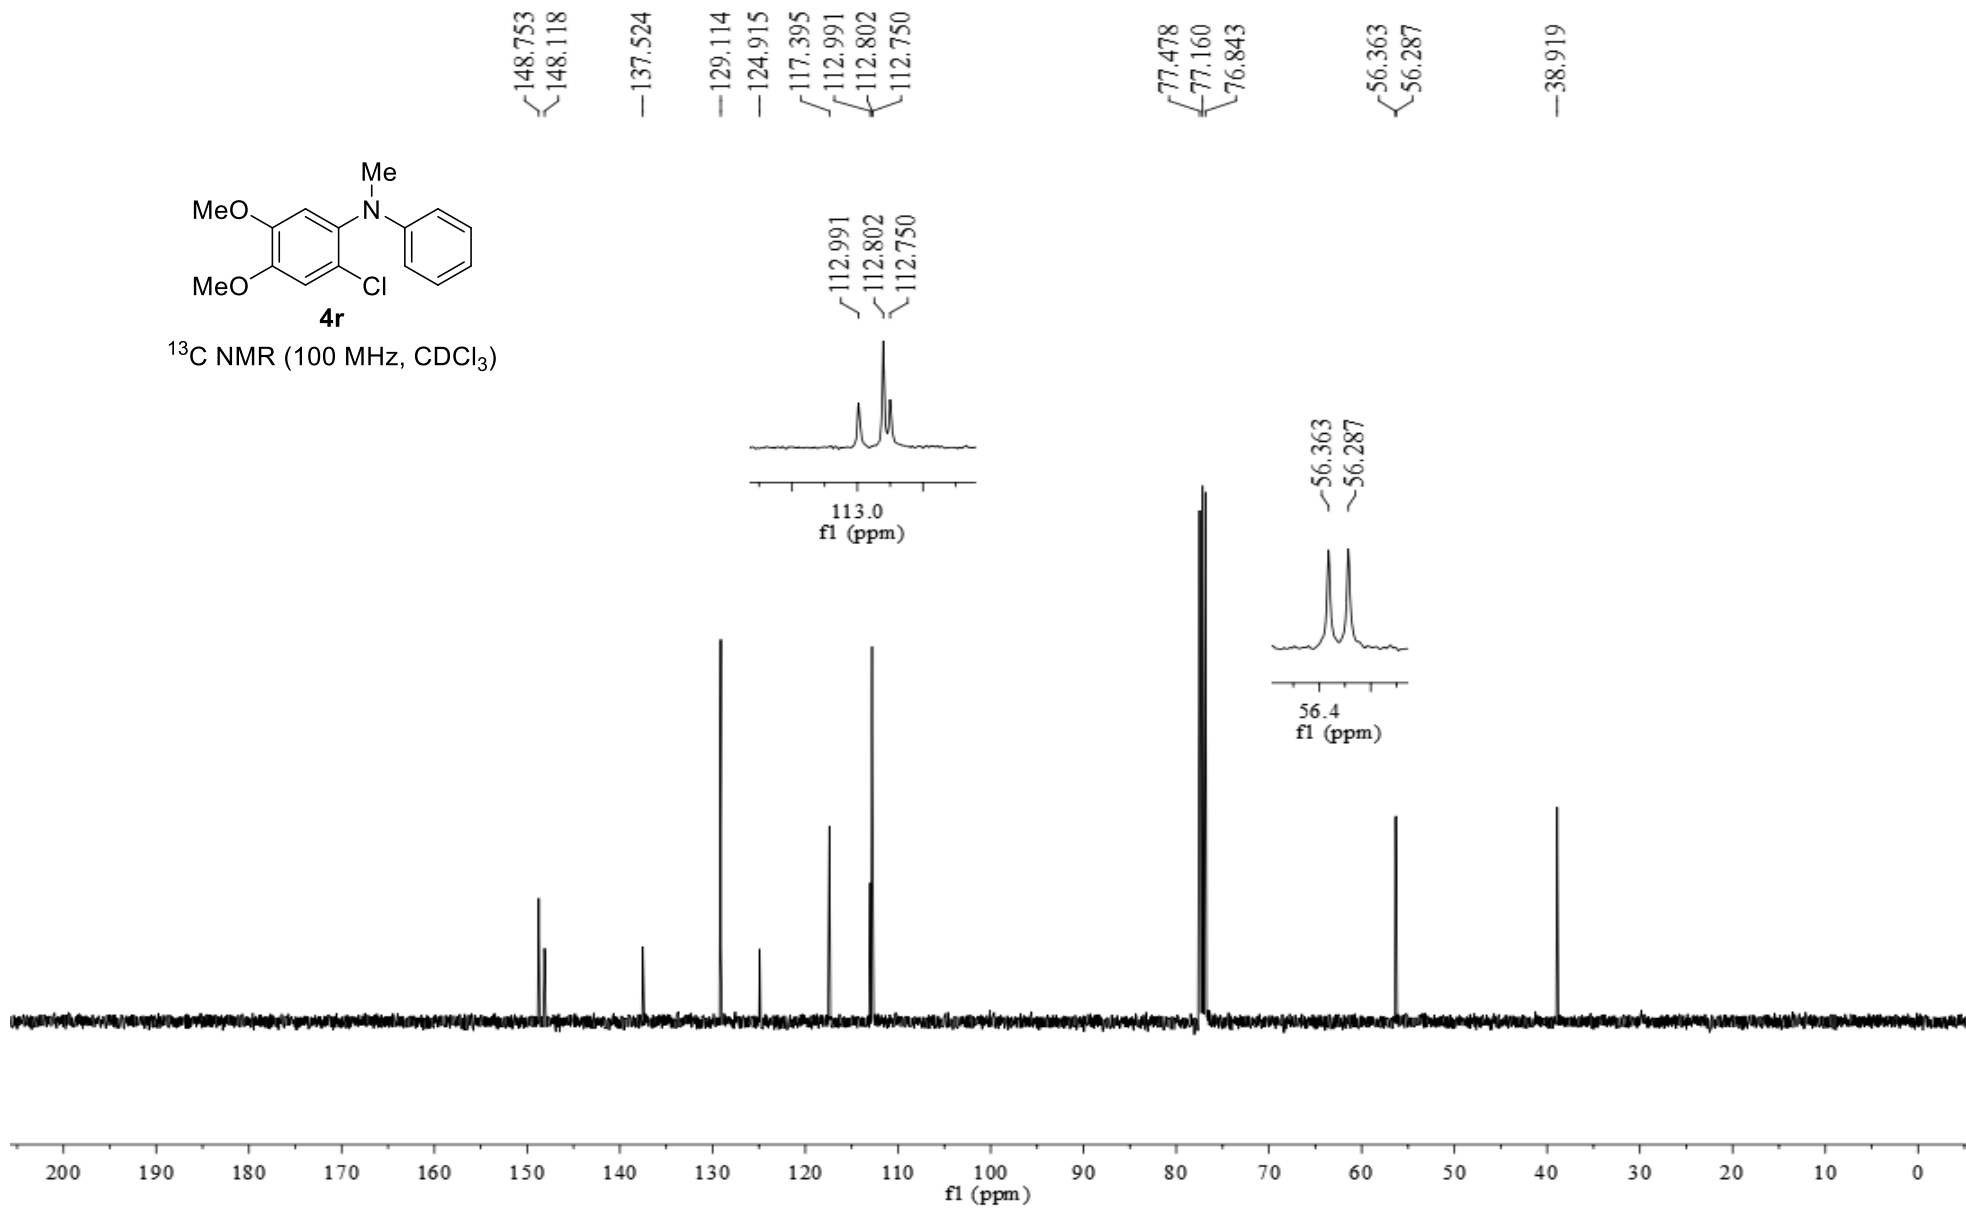



7.978  
7.770  
7.765  
7.749  
7.742  
7.724  
7.717  
7.478  
7.475  
7.467  
7.459  
7.456  
7.451  
7.214  
7.196  
7.193  
7.179  
7.175  
6.801  
6.783  
6.764  
6.662  
6.660  
6.640  
6.638

—3.330

—0.000

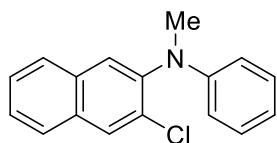

**4s**

<sup>1</sup>H NMR (400 MHz, CDCl<sub>3</sub>)

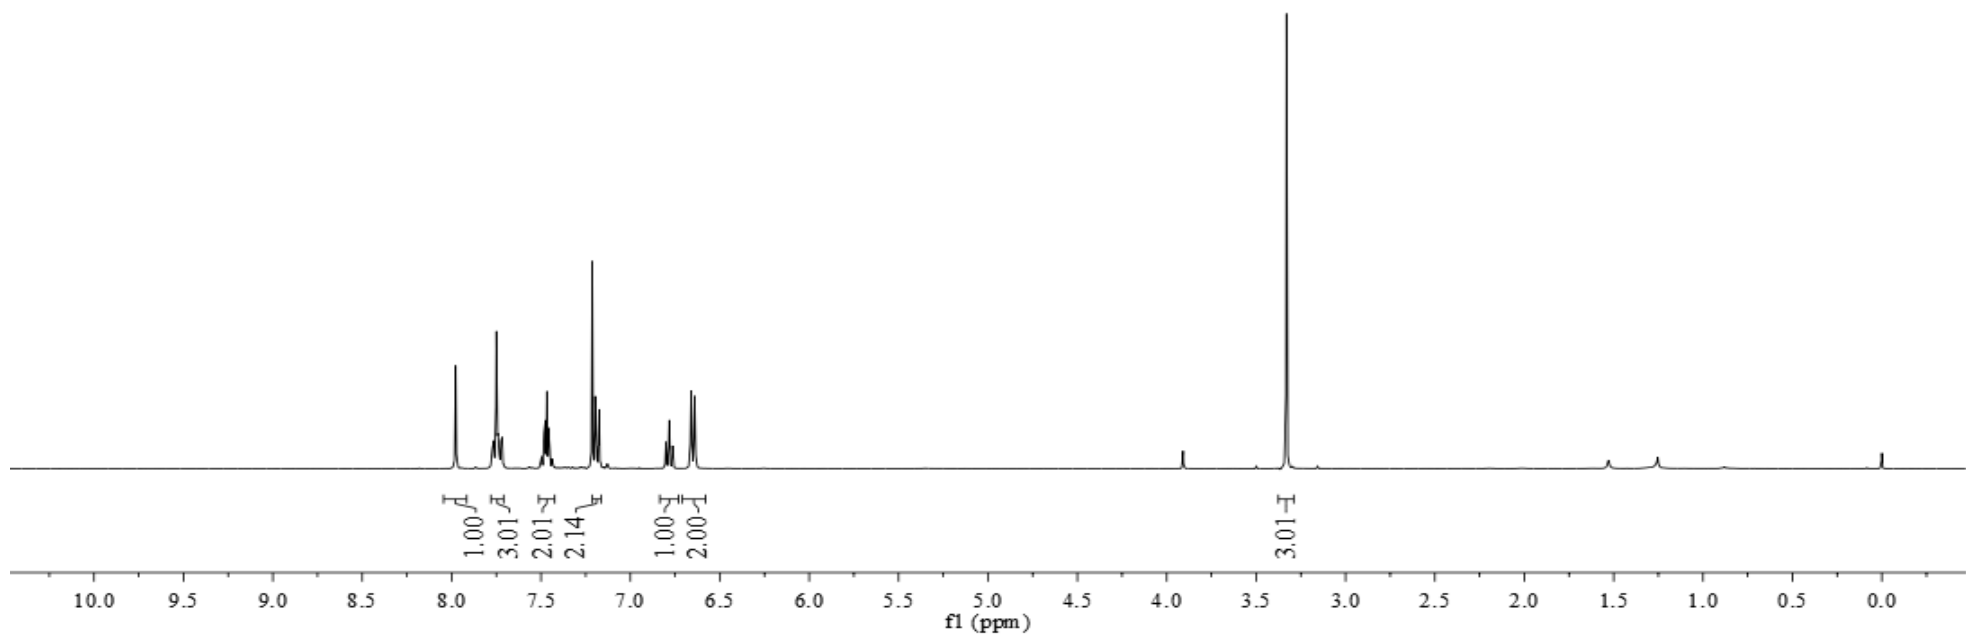

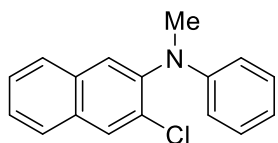

**4s**

<sup>13</sup>C NMR (100 MHz, CDCl<sub>3</sub>)

149.180  
143.261  
129.449  
129.099  
128.287  
127.481  
126.865  
126.527  
118.137  
113.964

77.478  
77.160  
76.843

39.775

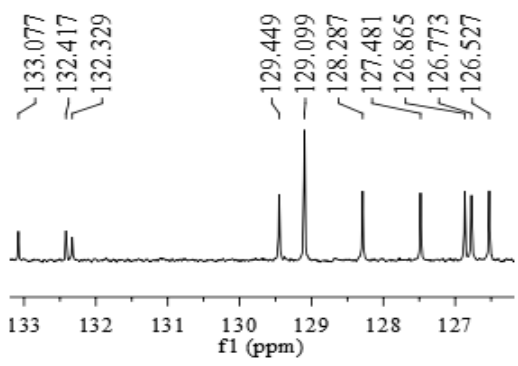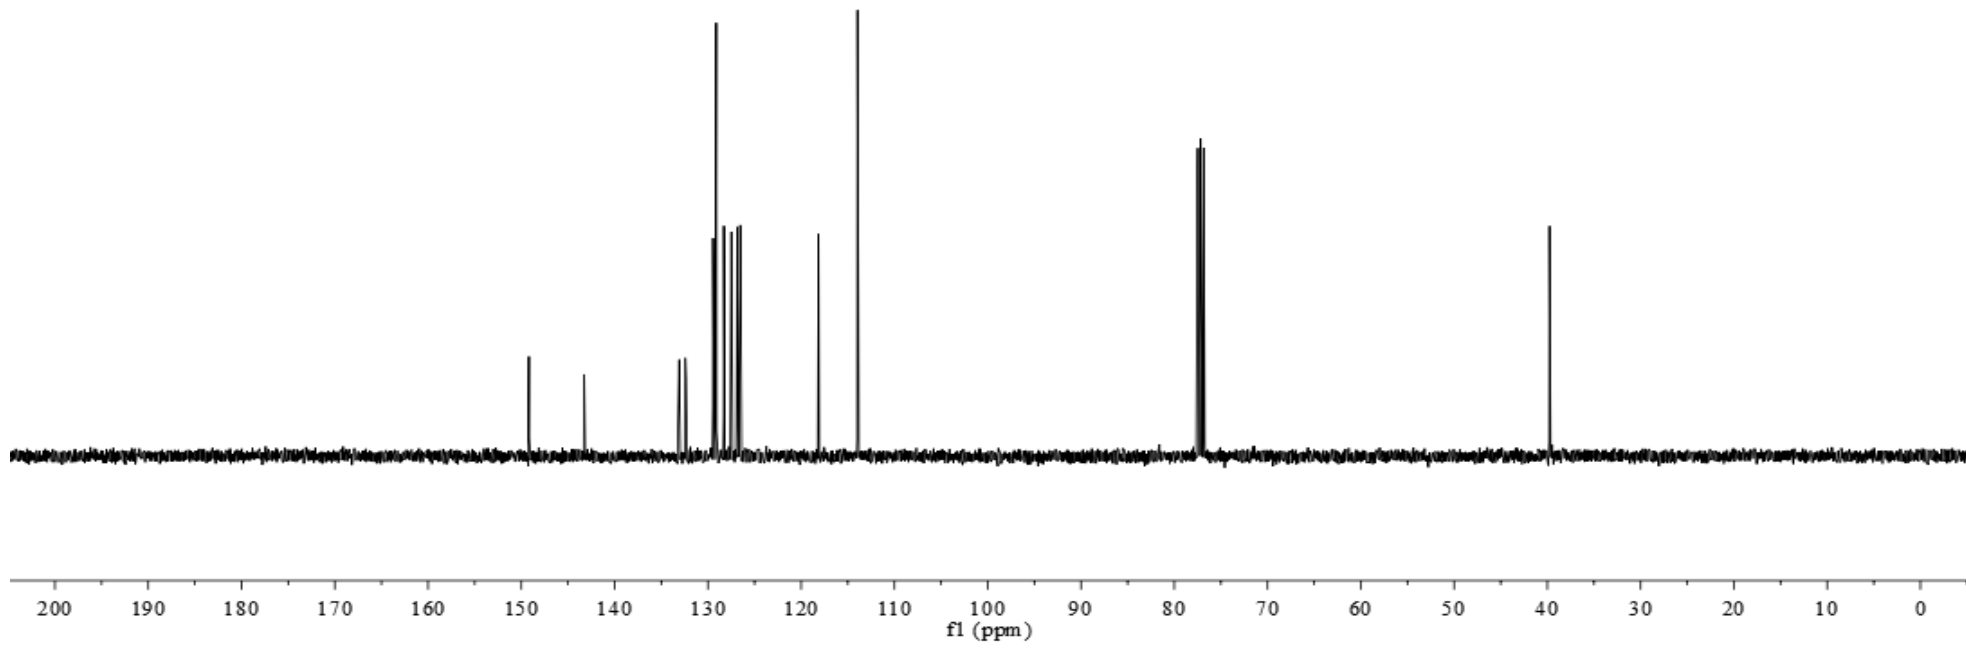

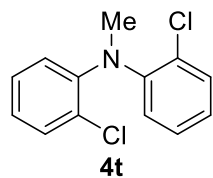

$^1\text{H NMR}$  (400 MHz,  $\text{CDCl}_3$ )

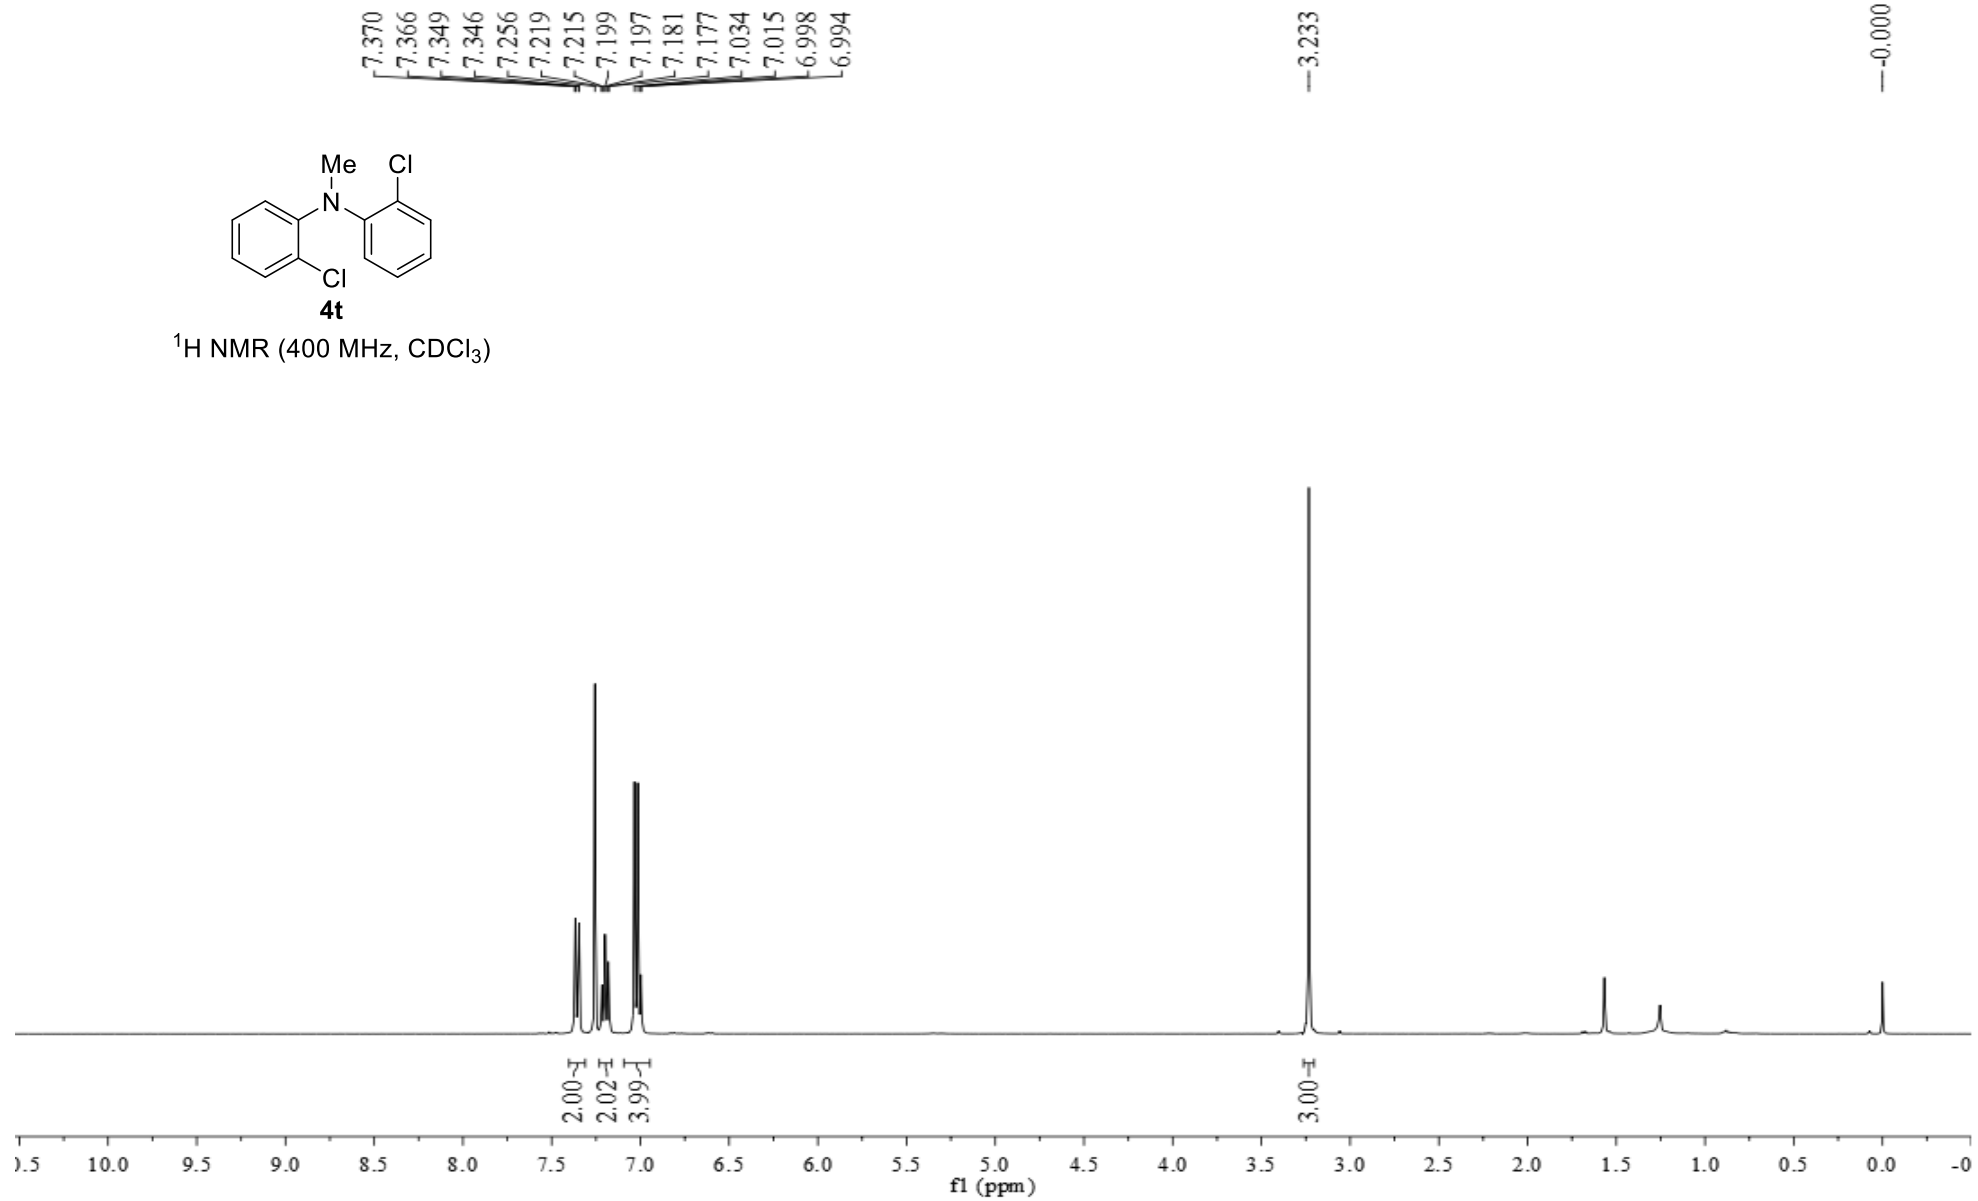

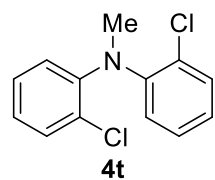

$^{13}\text{C}$  NMR (100 MHz,  $\text{CDCl}_3$ )

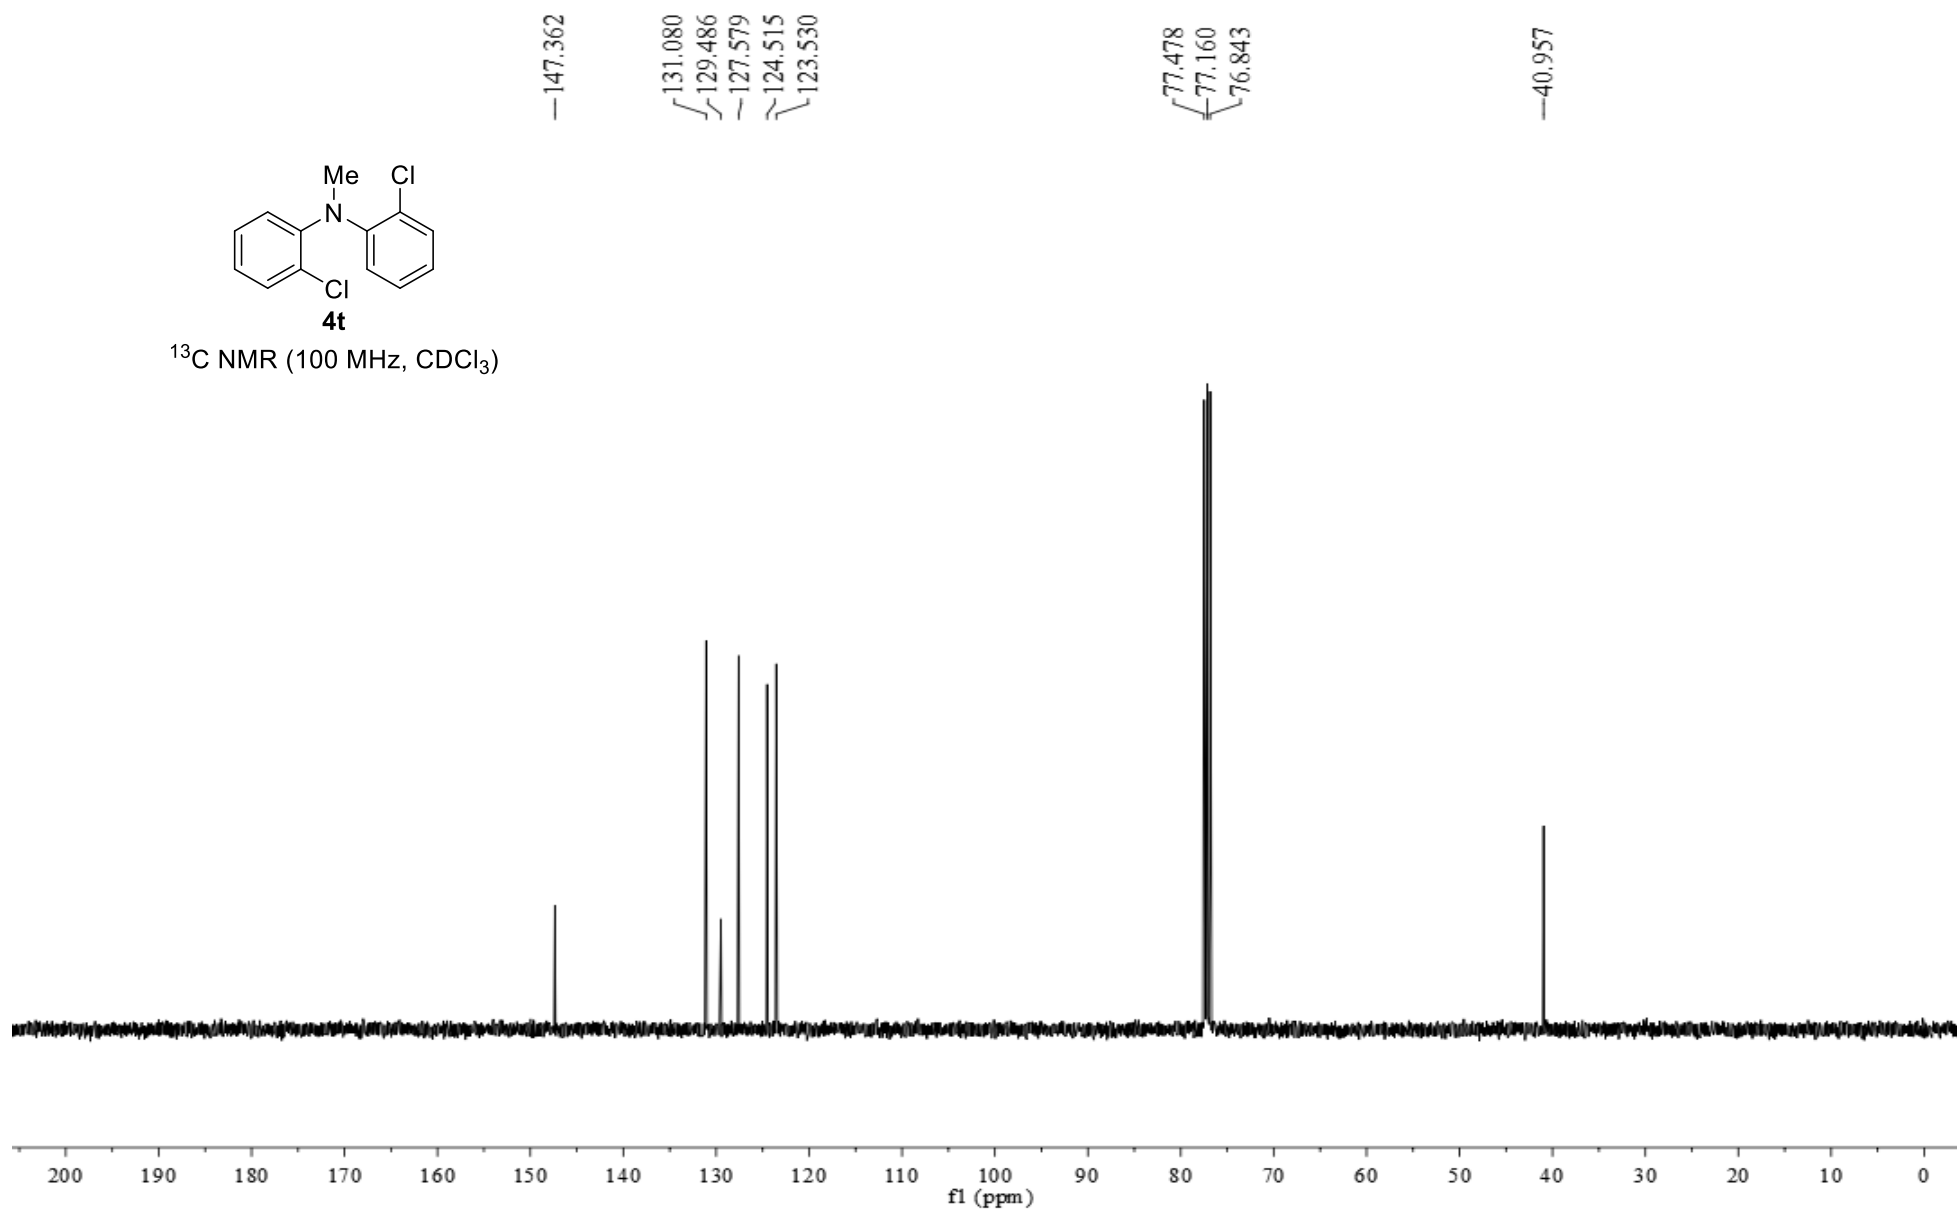

7.495  
7.494  
7.476  
7.474  
7.285  
7.268  
7.264  
7.261  
7.255  
7.220  
7.200  
7.188  
7.183  
7.182  
7.179  
7.162  
7.143  
7.142  
6.740  
6.738  
6.722  
6.720  
6.703  
6.701  
6.569  
6.567  
6.549  
6.547

3.710  
3.692  
3.675  
3.657

1.232  
1.215  
1.196

—0.000

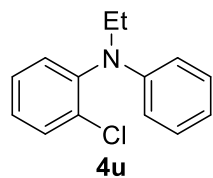

<sup>1</sup>H NMR (400 MHz, CDCl<sub>3</sub>)

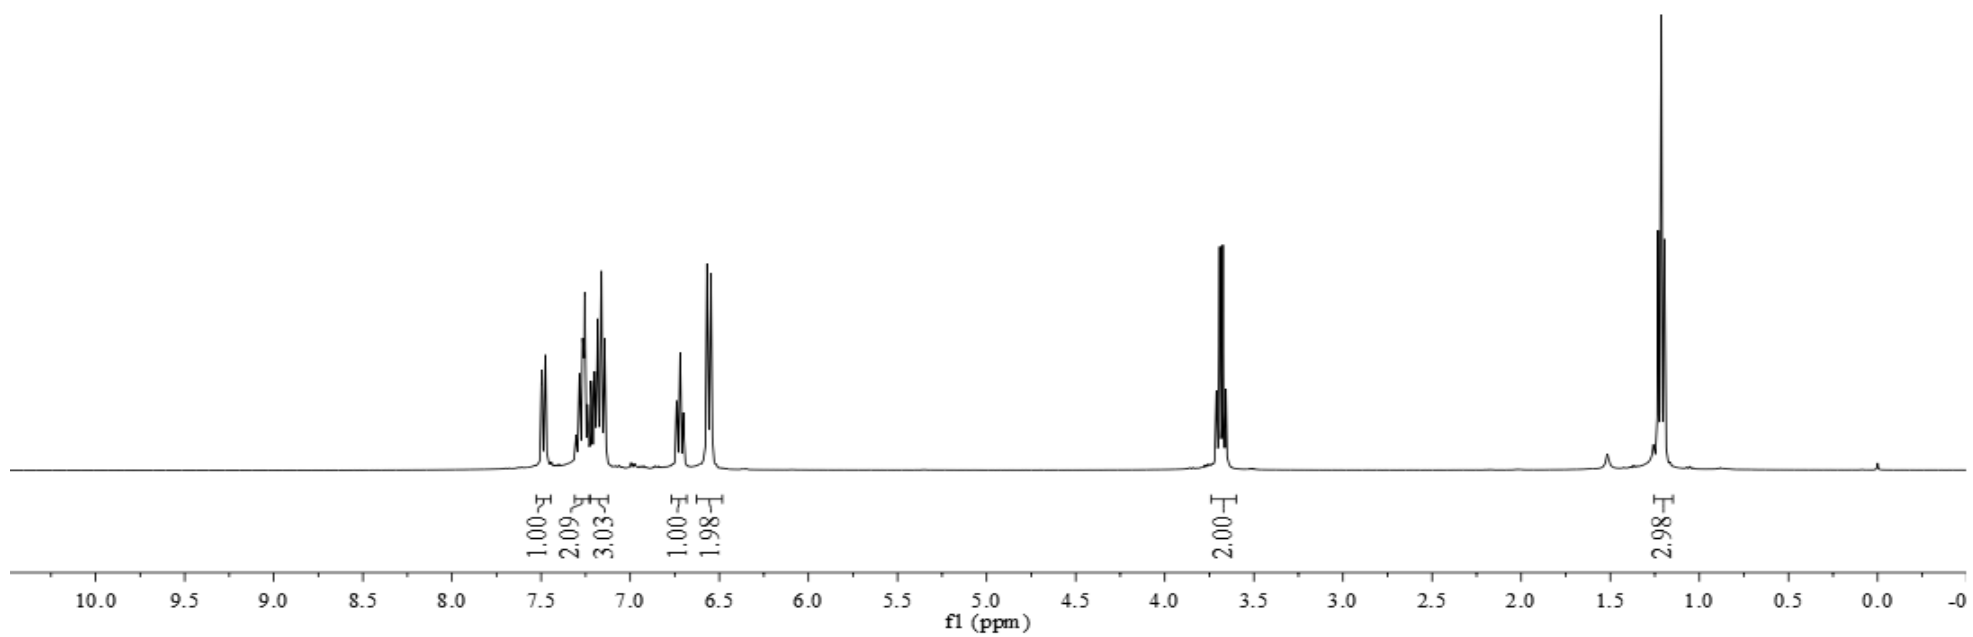

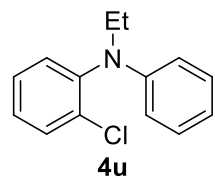

$^{13}\text{C}$  NMR (100 MHz,  $\text{CDCl}_3$ )

— 147.733  
— 143.691  
— 134.485  
— 131.752  
— 131.056  
— 129.132  
— 128.176  
— 127.581  
— 117.479  
— 113.455

{ 77.478  
{ 77.160  
{ 76.842

— 45.513

— 12.814

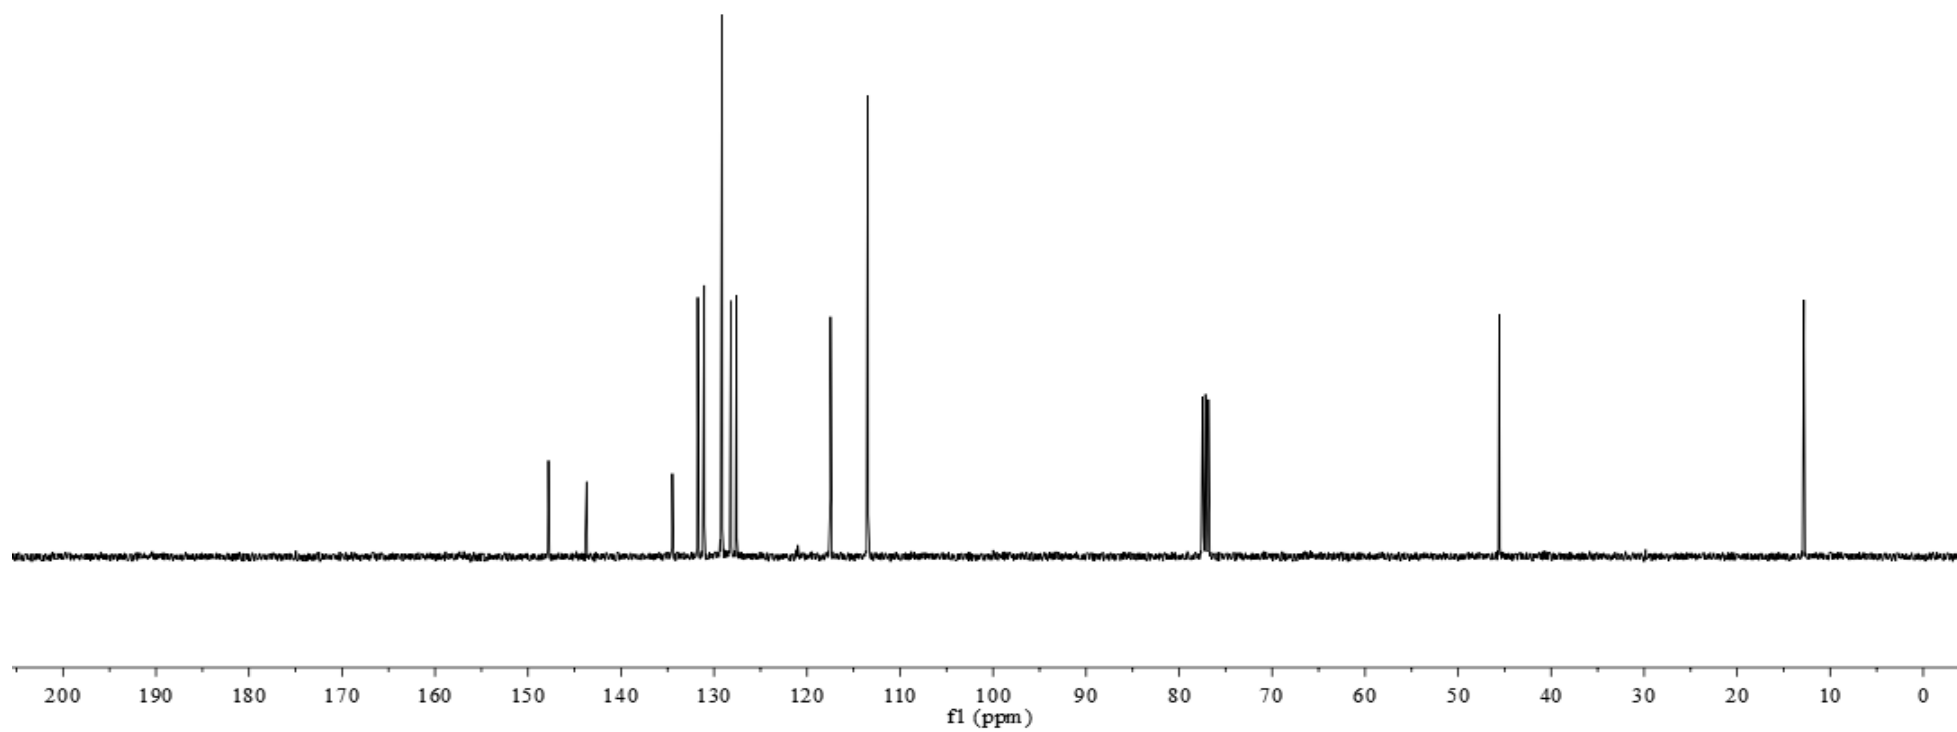

7.377  
7.373  
7.357  
7.353  
7.260  
7.213  
7.209  
7.195  
7.193  
7.191  
7.189  
7.175  
7.171  
7.091  
7.087  
7.071  
7.067  
6.978  
6.974  
6.960  
6.958  
6.956  
6.954  
6.940  
6.936

3.157  
3.140  
3.122  
3.104

1.047  
1.030  
1.012

-0.000

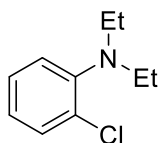

4v

<sup>1</sup>H NMR (400 MHz, CDCl<sub>3</sub>)

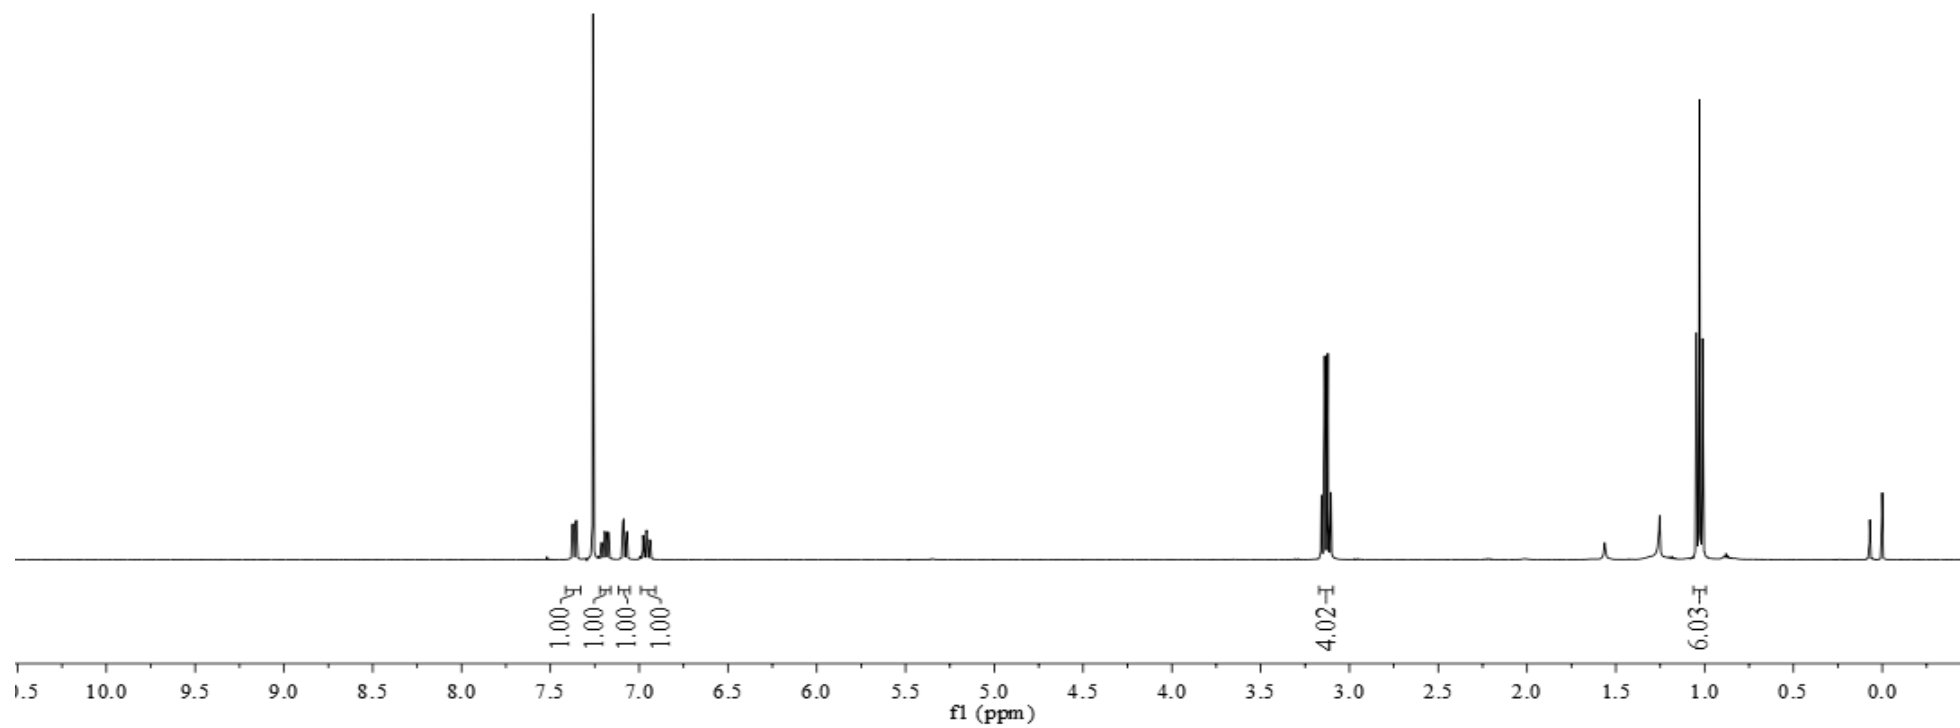

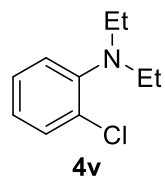

4v

$^{13}\text{C}$  NMR (100 MHz,  $\text{CDCl}_3$ )

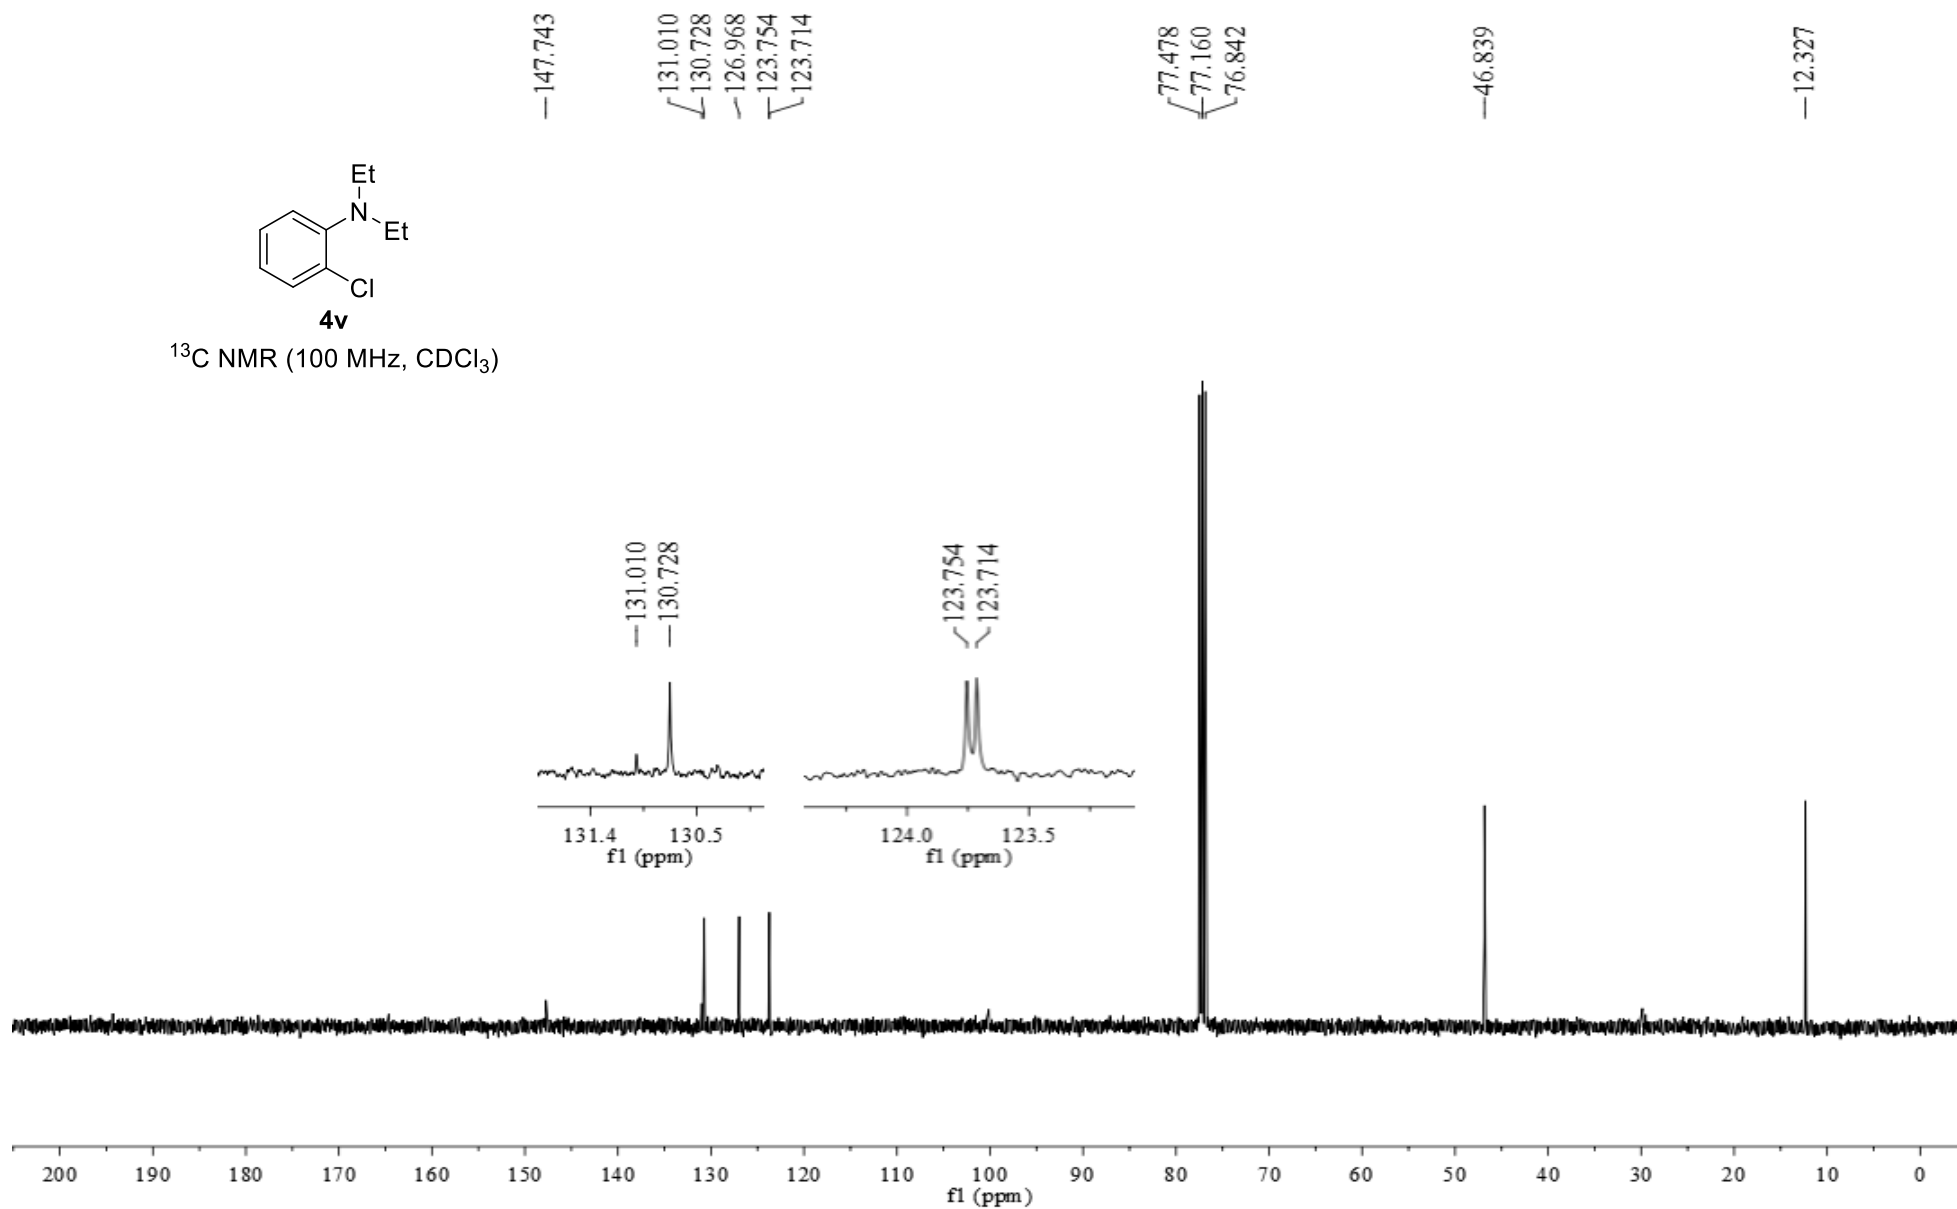



7.390  
7.386  
7.367  
7.290  
7.287  
7.283  
7.270  
7.266  
7.251  
7.225  
7.222  
7.218  
7.209  
7.204  
7.039  
7.035  
7.020  
7.016  
6.984  
6.980  
6.965  
6.961  
6.833  
6.829  
6.813  
6.809  
6.519

3.048  
3.030  
3.012  
2.631  
2.612  
1.853  
1.834  
1.825  
1.815  
1.807  
1.796  
1.778

—0.000

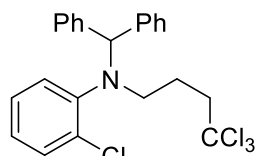

**4w**

<sup>1</sup>H NMR (400 MHz, CDCl<sub>3</sub>)

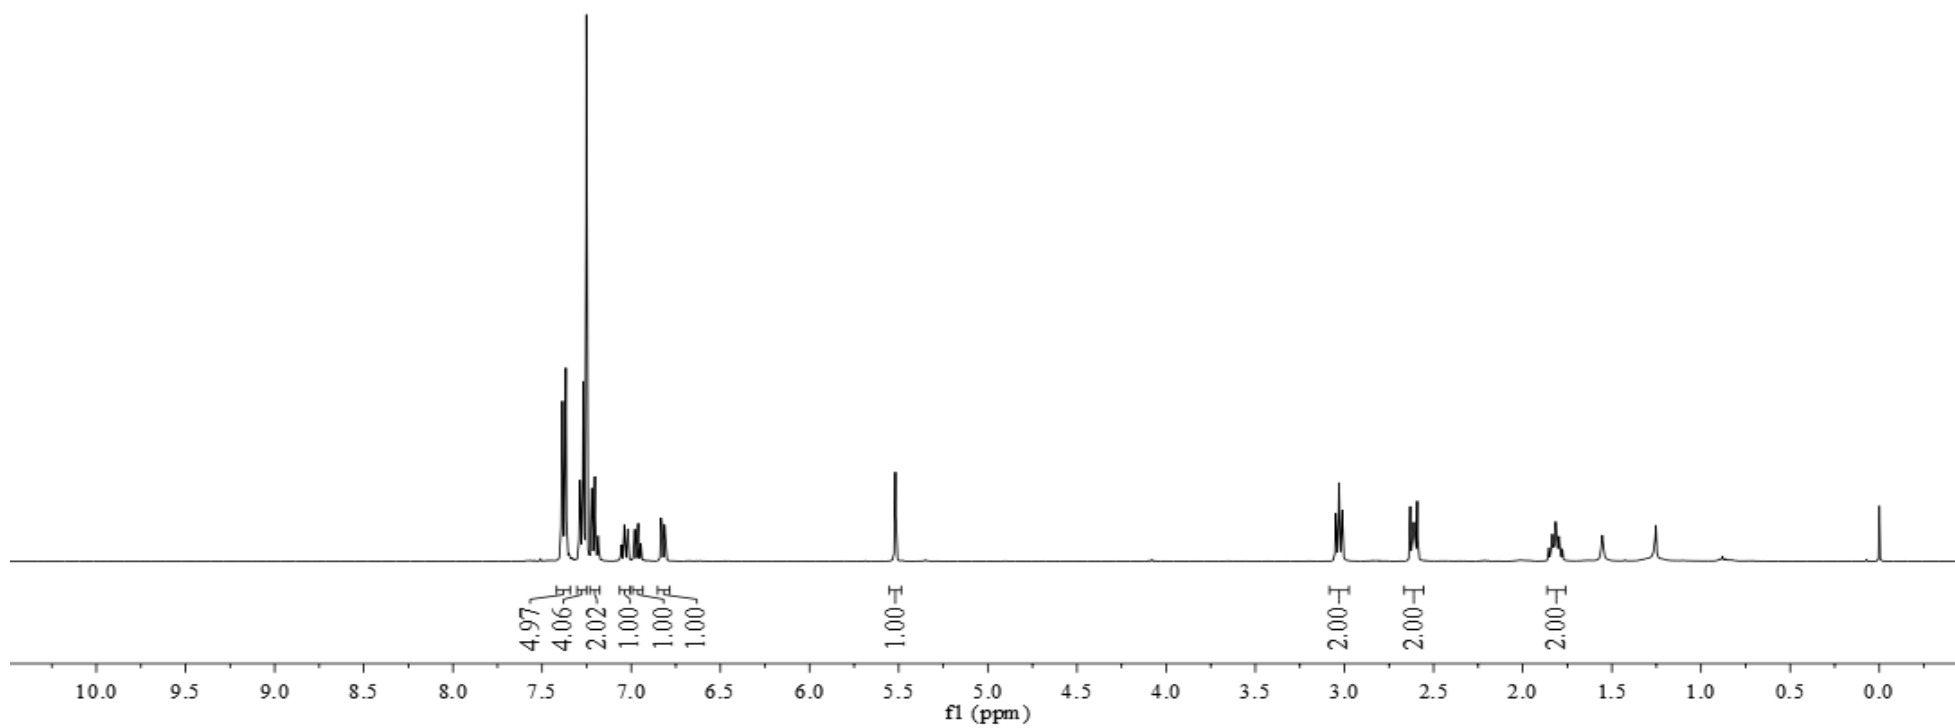

S57

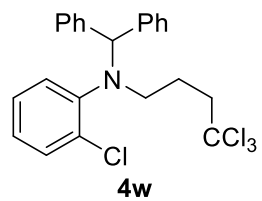

$^{13}\text{C}$  NMR (100 MHz,  $\text{CDCl}_3$ )

—145.671  
—140.543  
—132.618  
—130.654  
—128.717  
—128.314  
—127.256  
—126.836  
—126.769  
—125.340  
—100.019  
—77.477  
—77.160  
—76.842  
—71.205  
—52.886  
—47.509  
—23.454

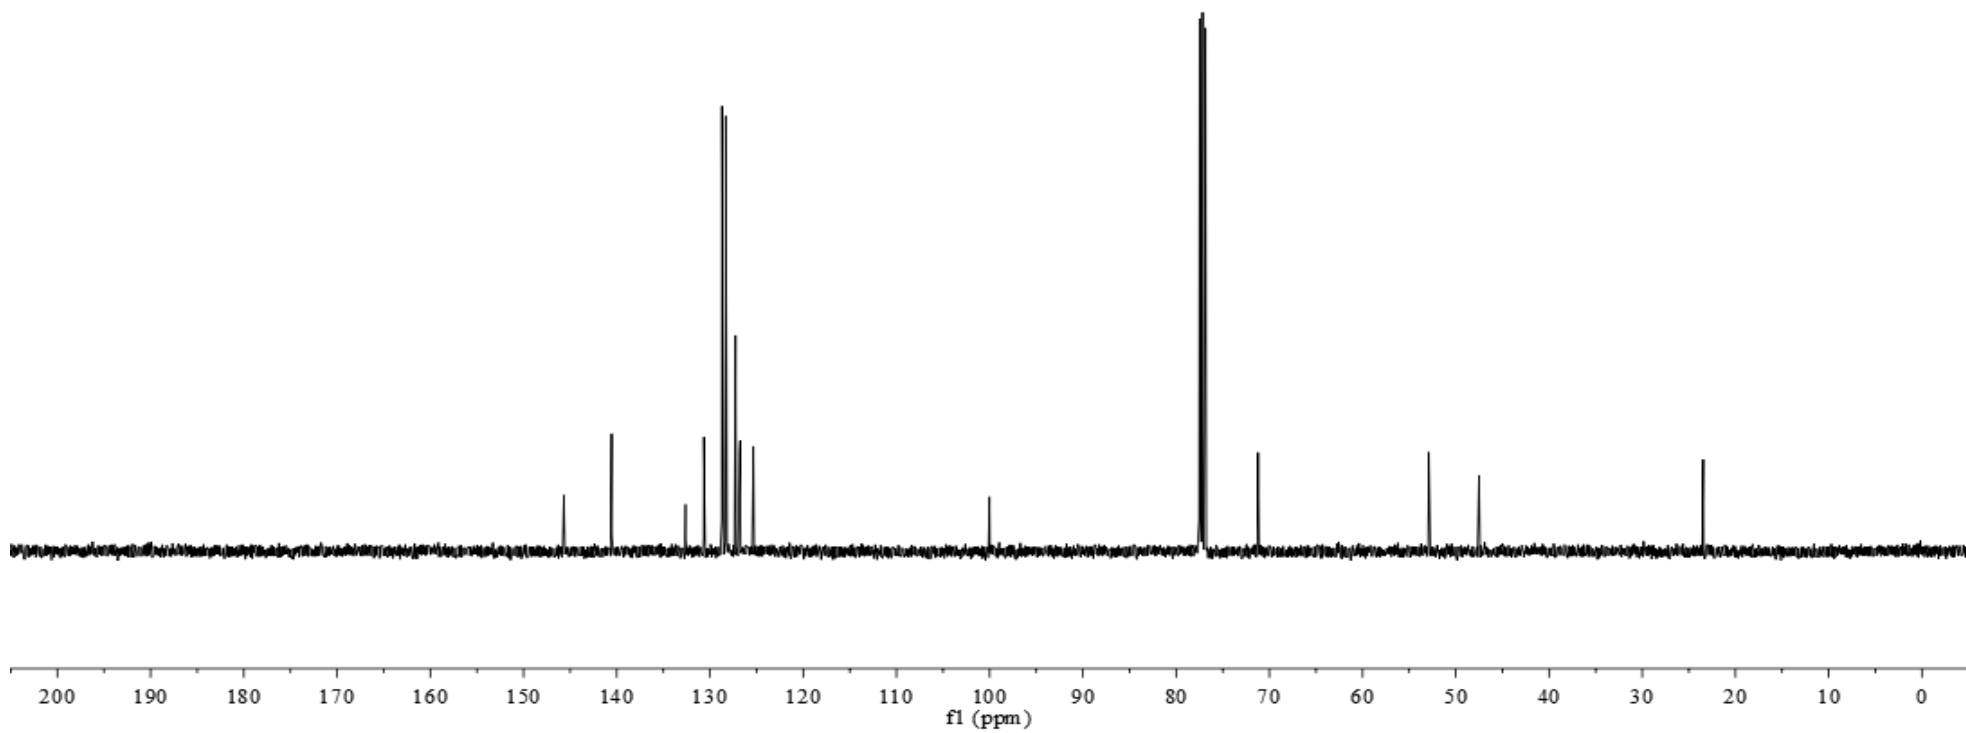

7.383  
7.379  
7.362  
7.359  
7.321  
7.317  
7.299  
7.273  
7.271  
7.266  
7.253  
7.249  
7.234  
7.205  
7.193  
7.187  
7.180  
7.171  
7.051  
7.047  
7.032  
7.029  
7.027  
7.013  
7.009  
6.913  
6.908  
6.904  
6.896  
6.888  
6.884  
6.878  
6.874  
6.190

0.000

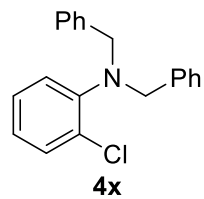

<sup>1</sup>H NMR (400 MHz, CDCl<sub>3</sub>)

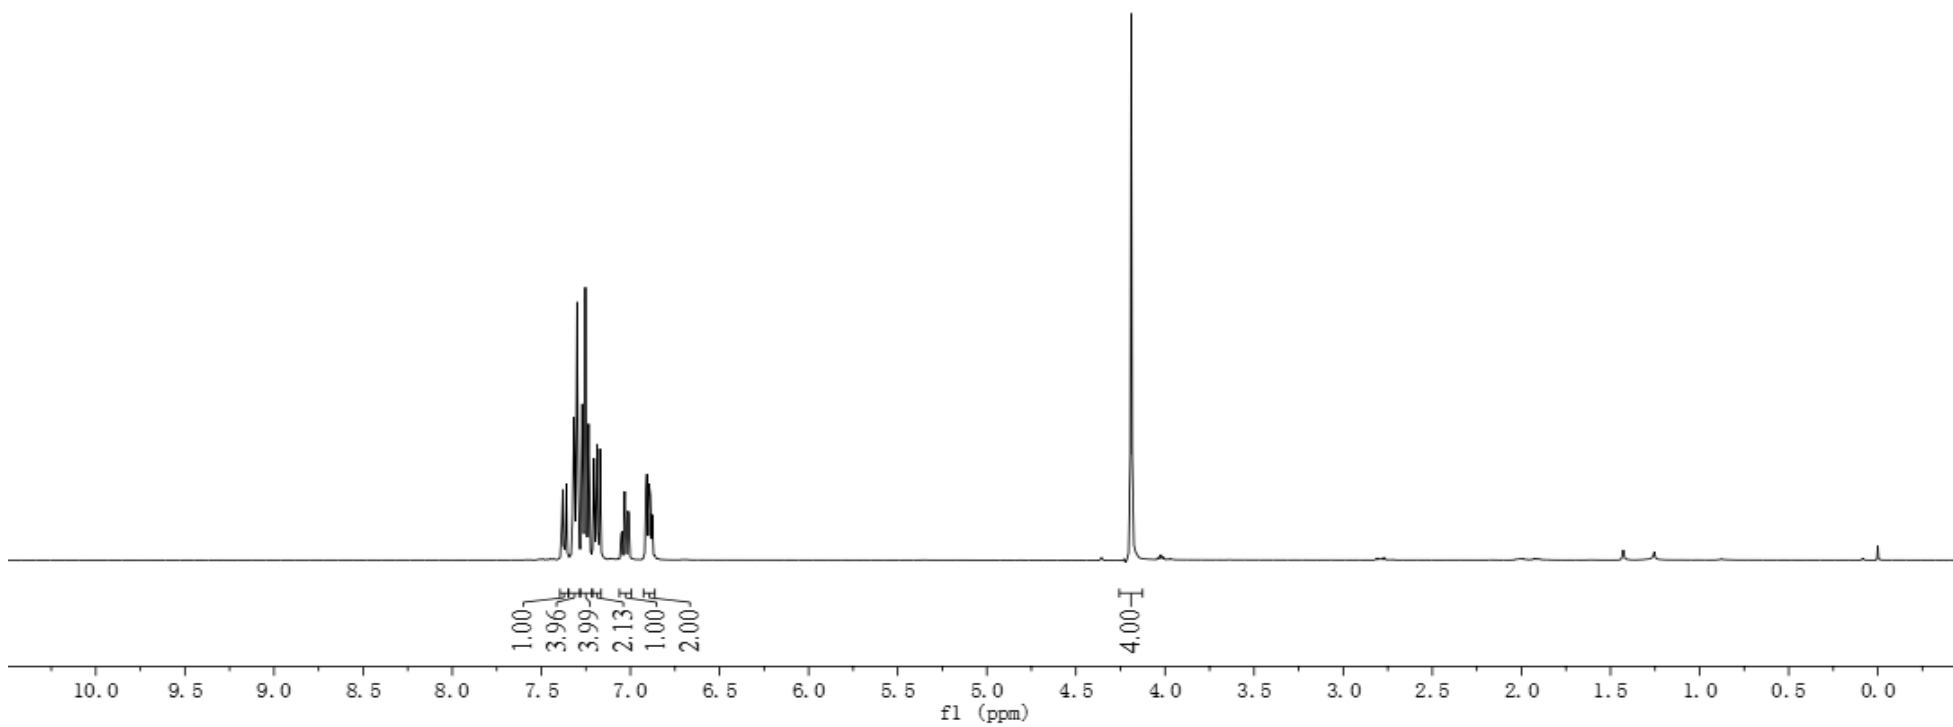

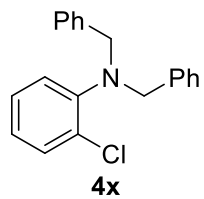

<sup>13</sup>C NMR (100 MHz, CDCl<sub>3</sub>)

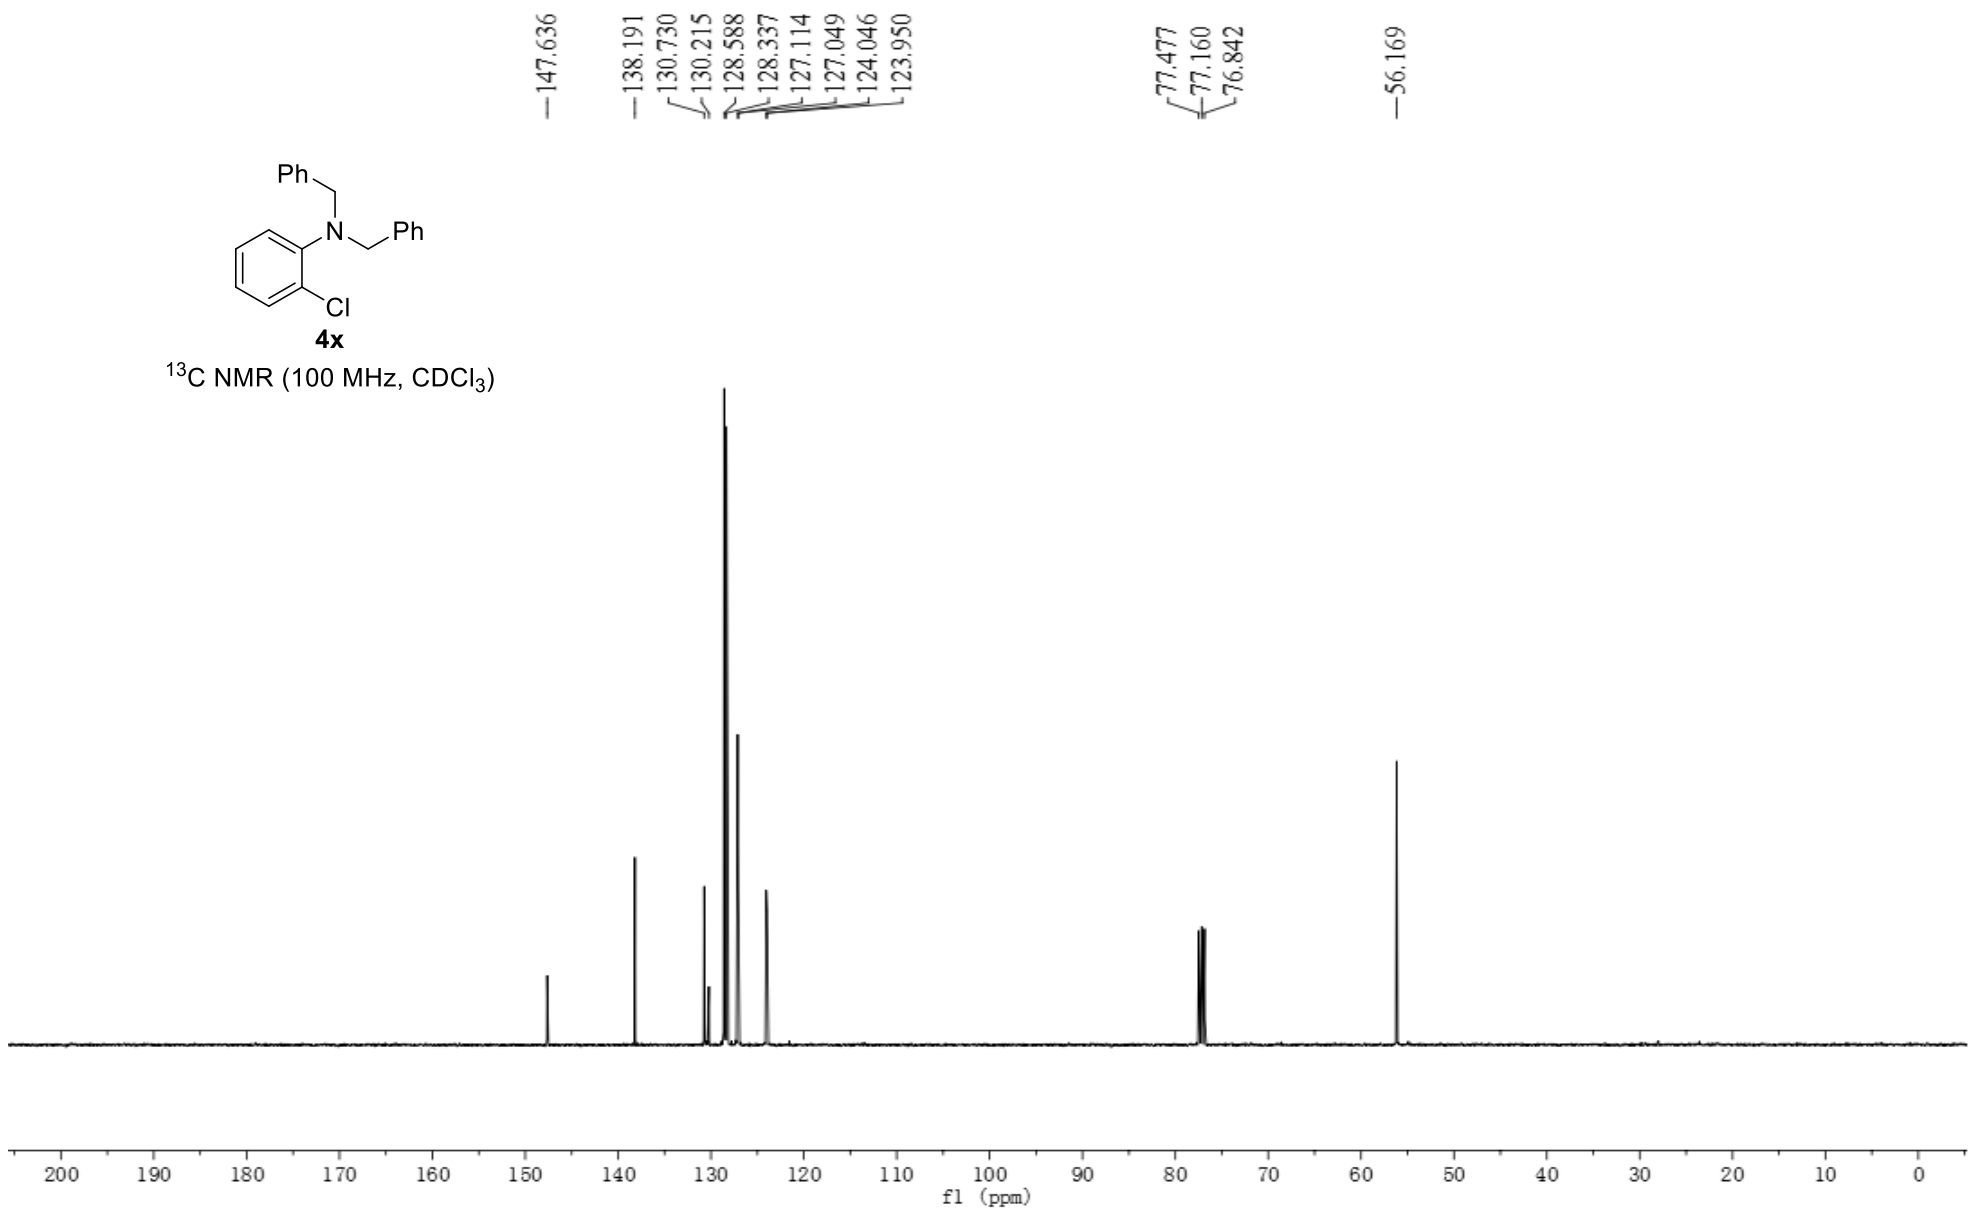

7.365  
7.361  
7.345  
7.341  
7.250  
7.181  
7.178  
7.161  
7.143  
7.139  
7.040  
7.036  
7.019  
7.016  
6.958  
6.954  
6.939  
6.936  
6.920  
6.916  
5.847  
5.821  
5.804  
5.778  
5.768  
5.204  
5.165  
5.161  
5.143  
5.140  
5.117  
5.114  
3.723  
3.708

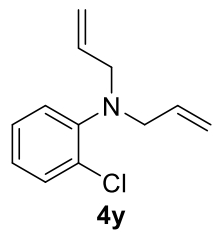

<sup>1</sup>H NMR (400 MHz, CDCl<sub>3</sub>)

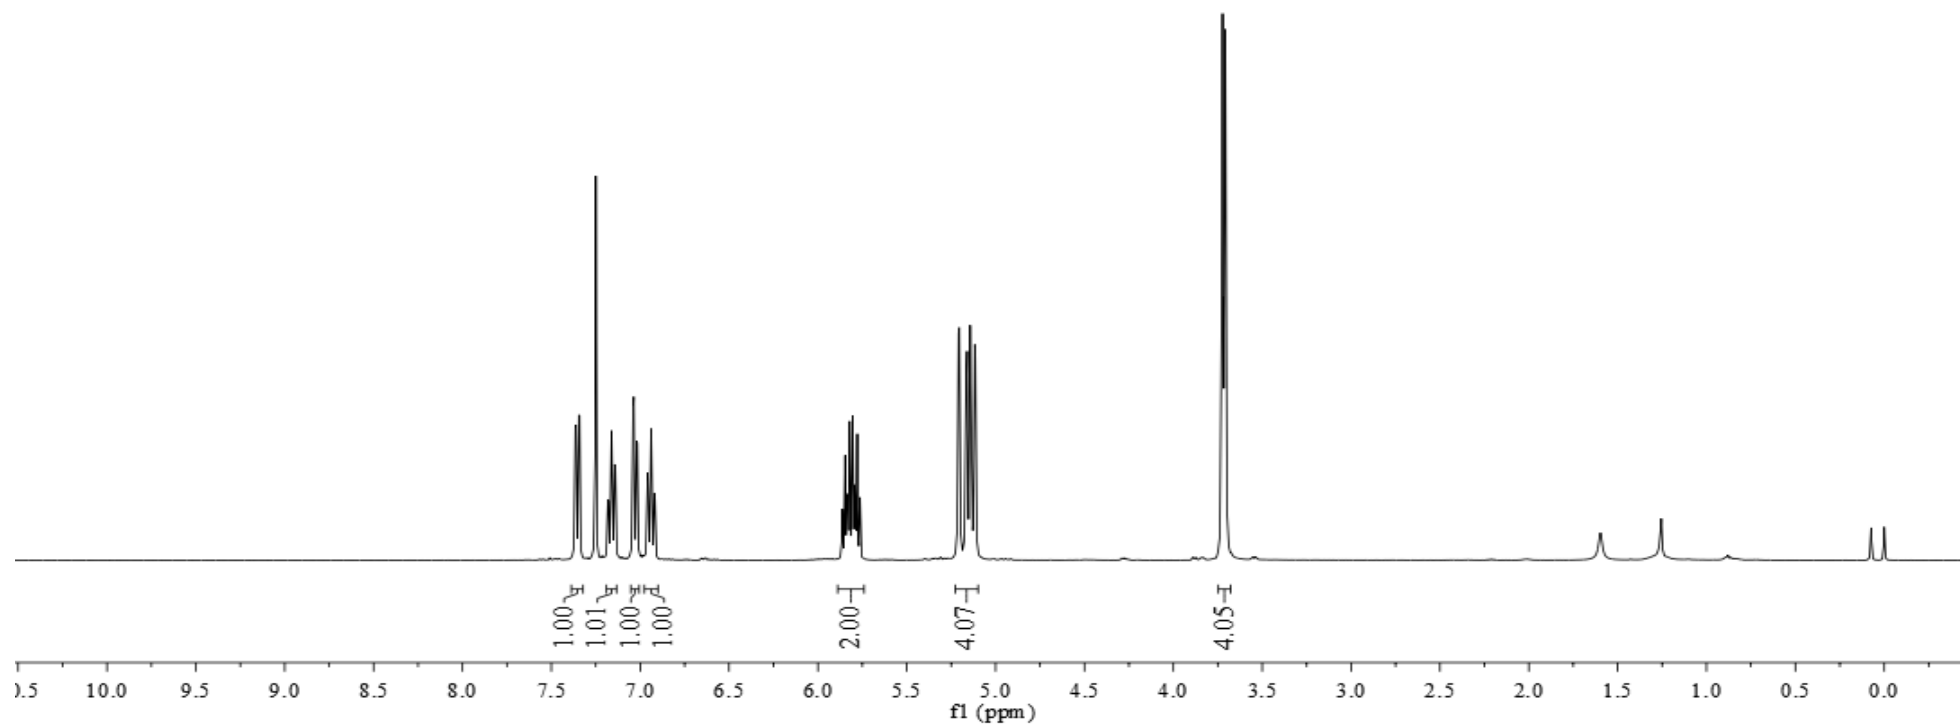

S61

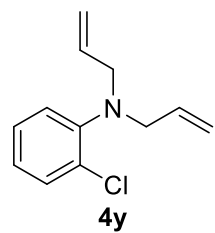

$^{13}\text{C}$  NMR (100 MHz,  $\text{CDCl}_3$ )

— 147.752  
✓ 134.852  
✓ 130.751  
✓ 129.743  
~ 126.920  
✓ 123.647  
✓ 123.458  
✓ 117.739  
{ 77.477  
{ 77.160  
{ 76.842  
— 54.965

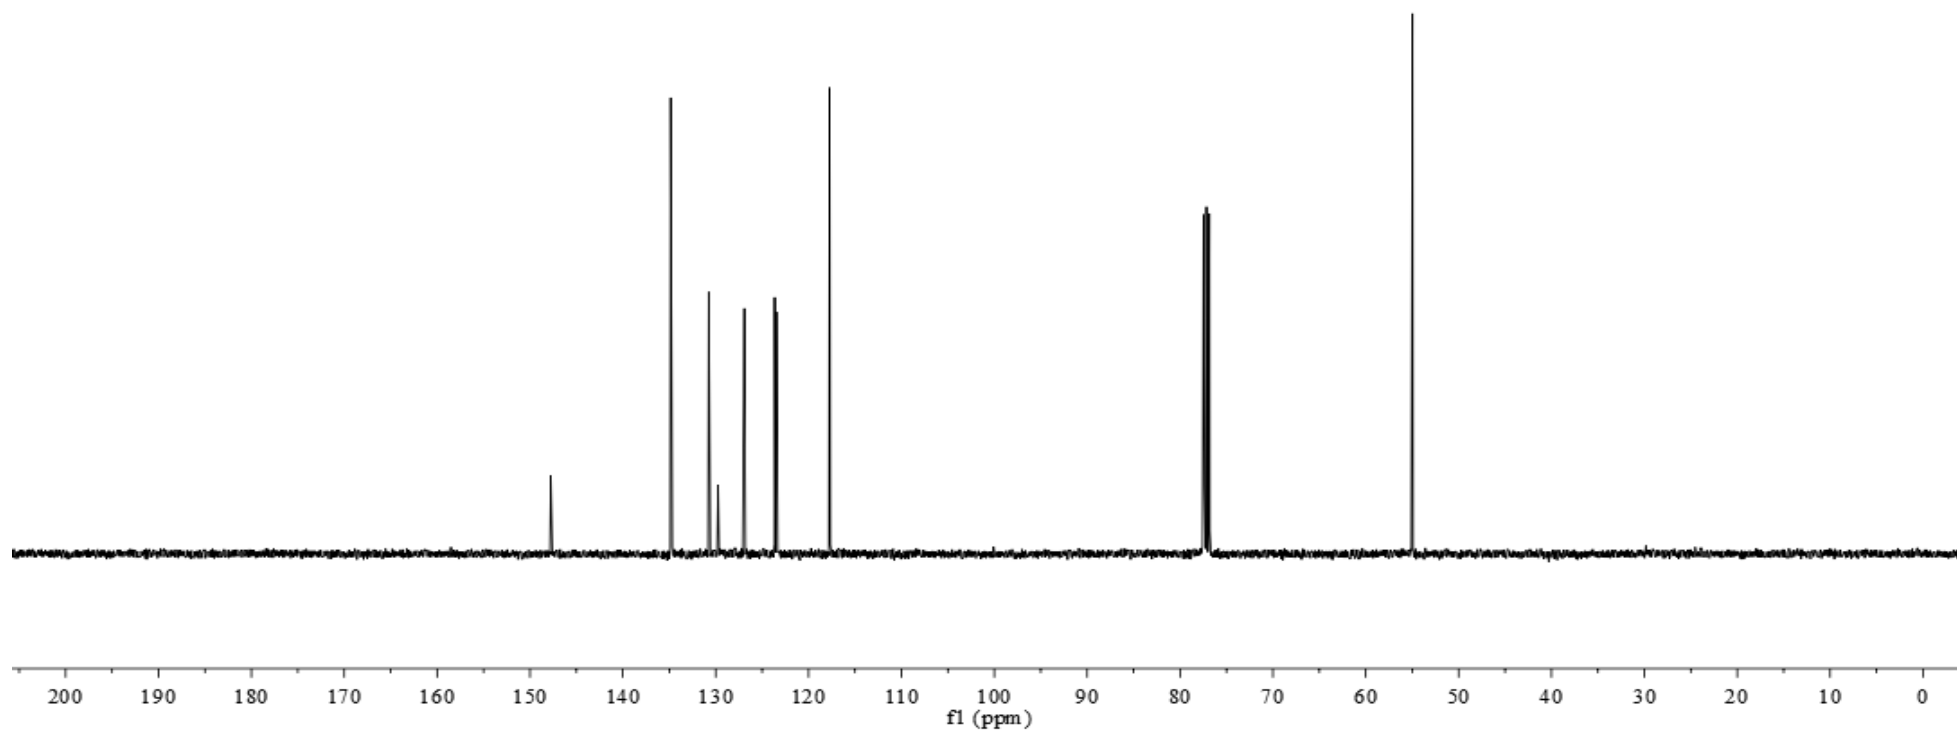

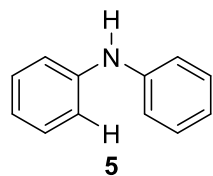

$^1\text{H}$  NMR (400 MHz,  $\text{CDCl}_3$ )

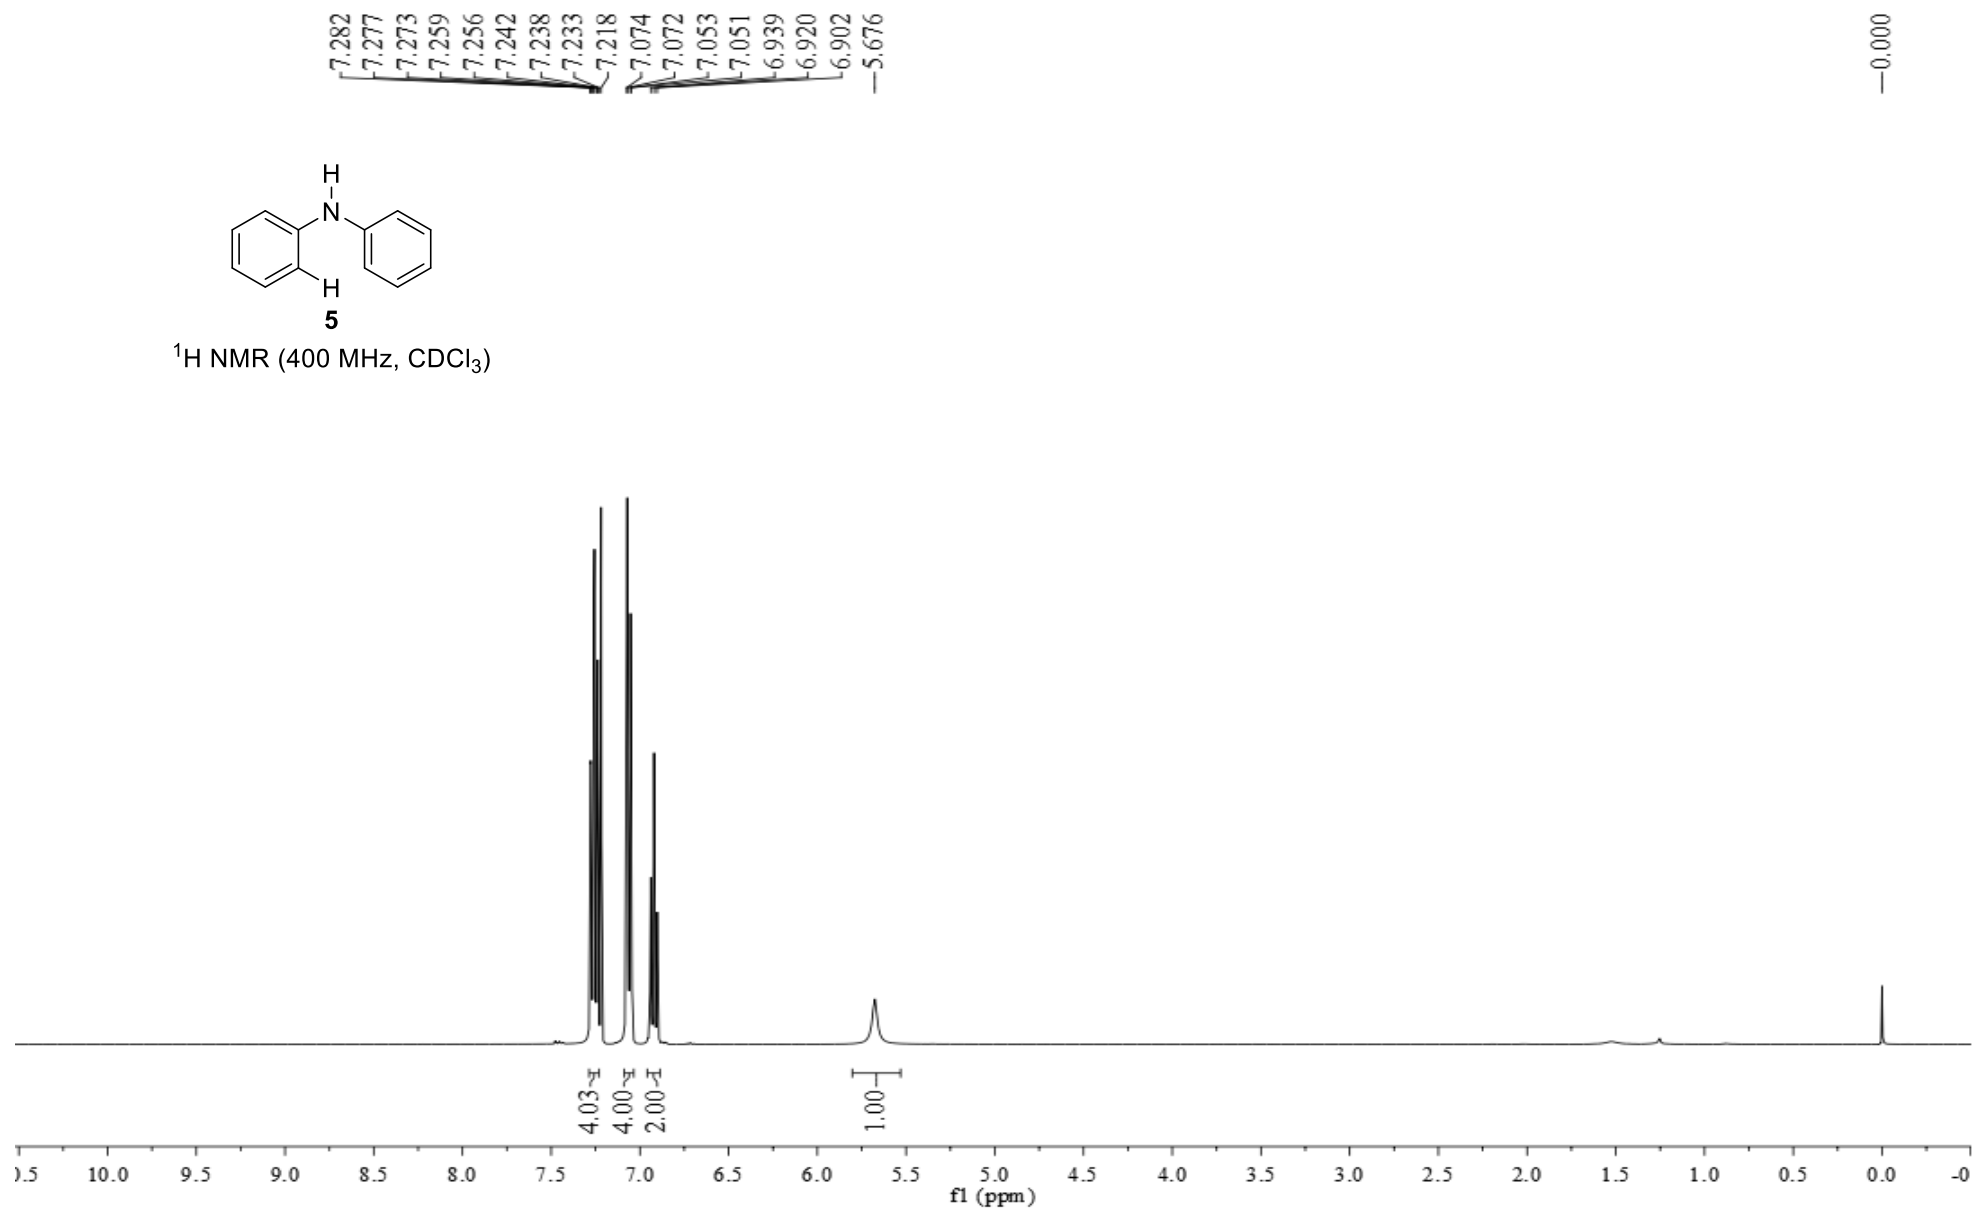

S63

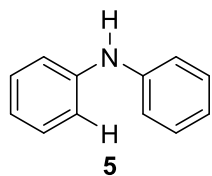

$^{13}\text{C}$  NMR (100 MHz,  $\text{CDCl}_3$ )

—143.181

—129.462

—121.090

—117.883

{ 77.477  
77.160  
76.842 }

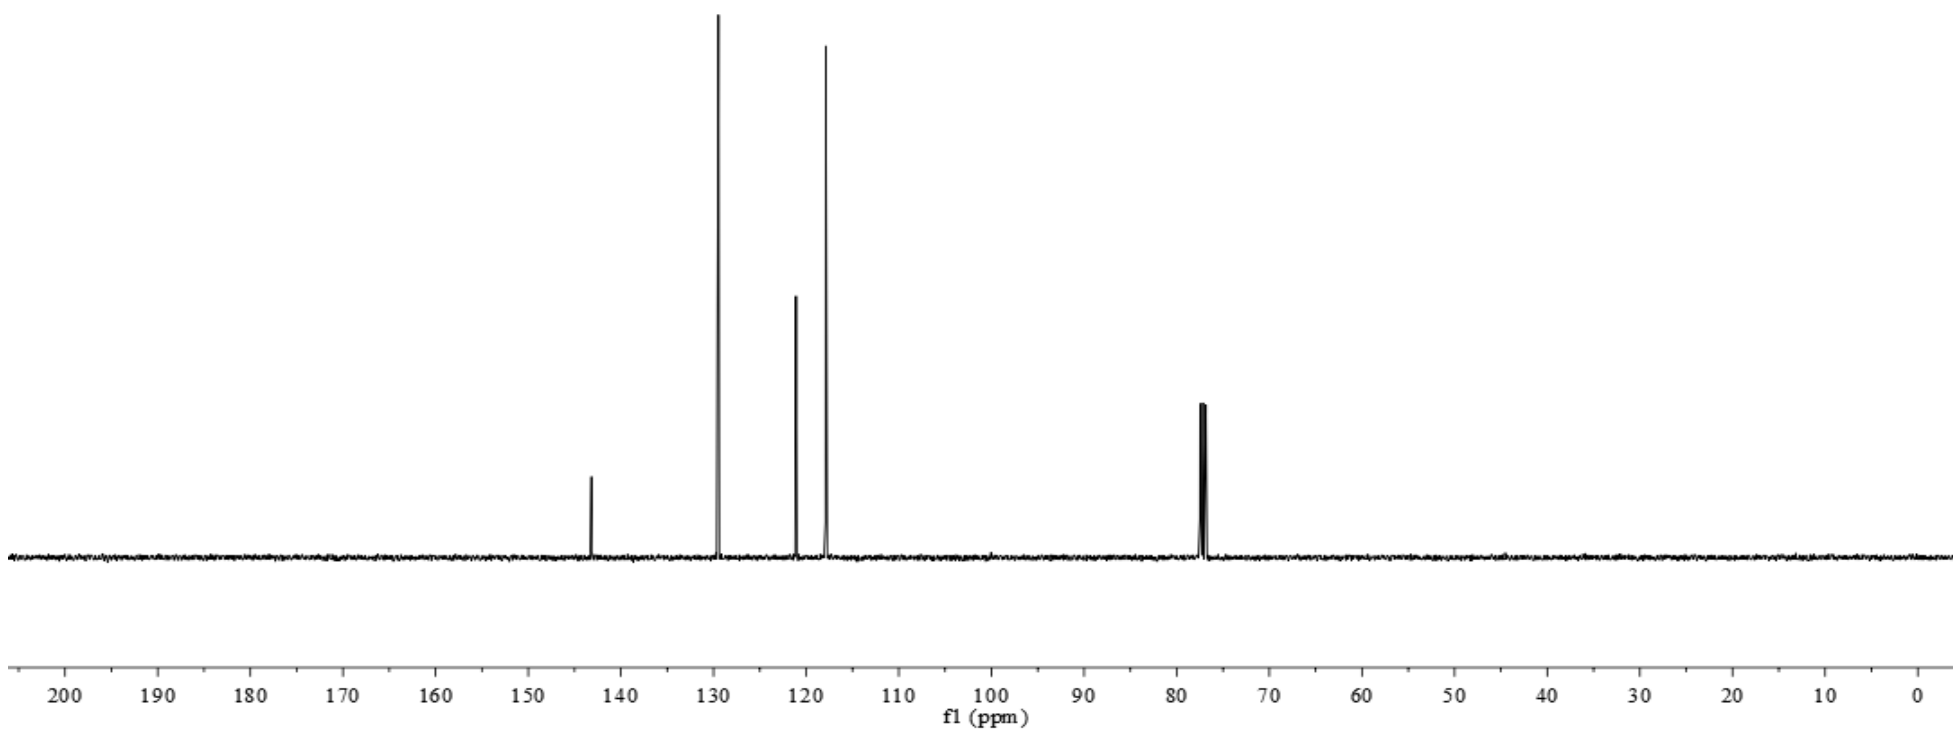



7.670  
7.666  
7.650  
7.646  
7.336  
7.332  
7.316  
7.313  
7.298  
7.294  
7.256  
7.251  
7.236  
7.232  
7.202  
7.196  
7.191  
7.178  
7.174  
7.161  
7.156  
7.151  
7.130  
7.126  
7.111  
7.106  
7.092  
7.088  
6.766  
6.748  
6.730  
6.577  
6.557

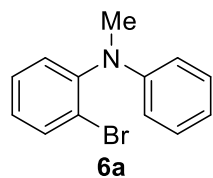

<sup>1</sup>H NMR (400 MHz, CDCl<sub>3</sub>)

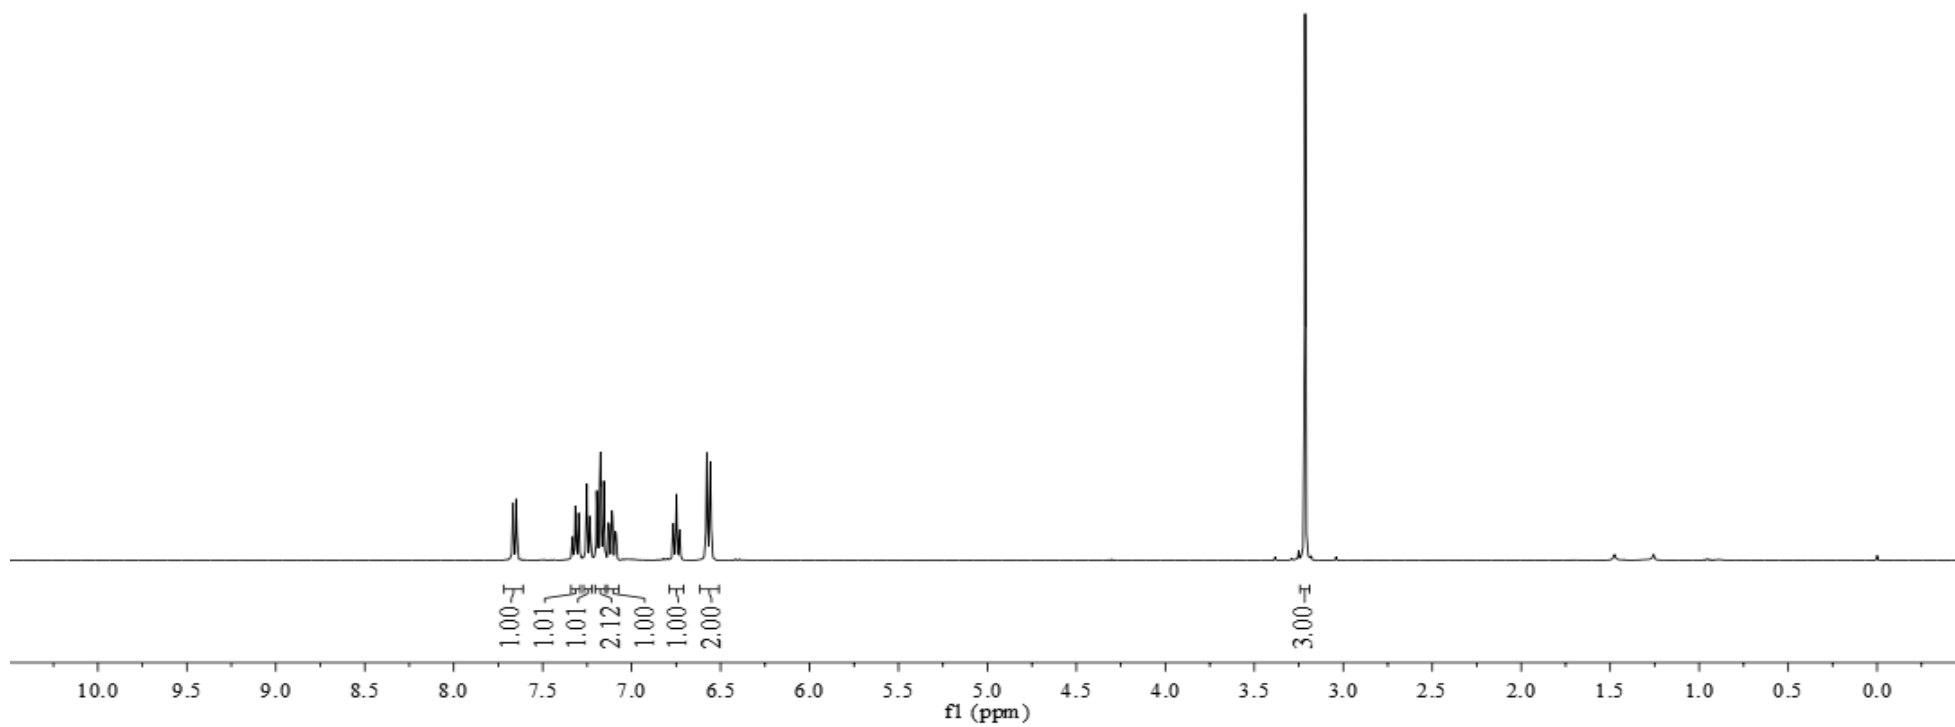

—3.215

—-0.000

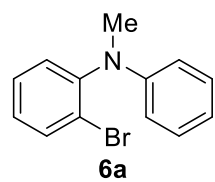

$^{13}\text{C}$  NMR (100 MHz,  $\text{CDCl}_3$ )

~148.604  
~146.978  
~134.216  
~130.546  
~129.045  
~127.874  
~124.364  
~117.800  
~113.483  
77.478  
77.160  
76.843  
-39.074

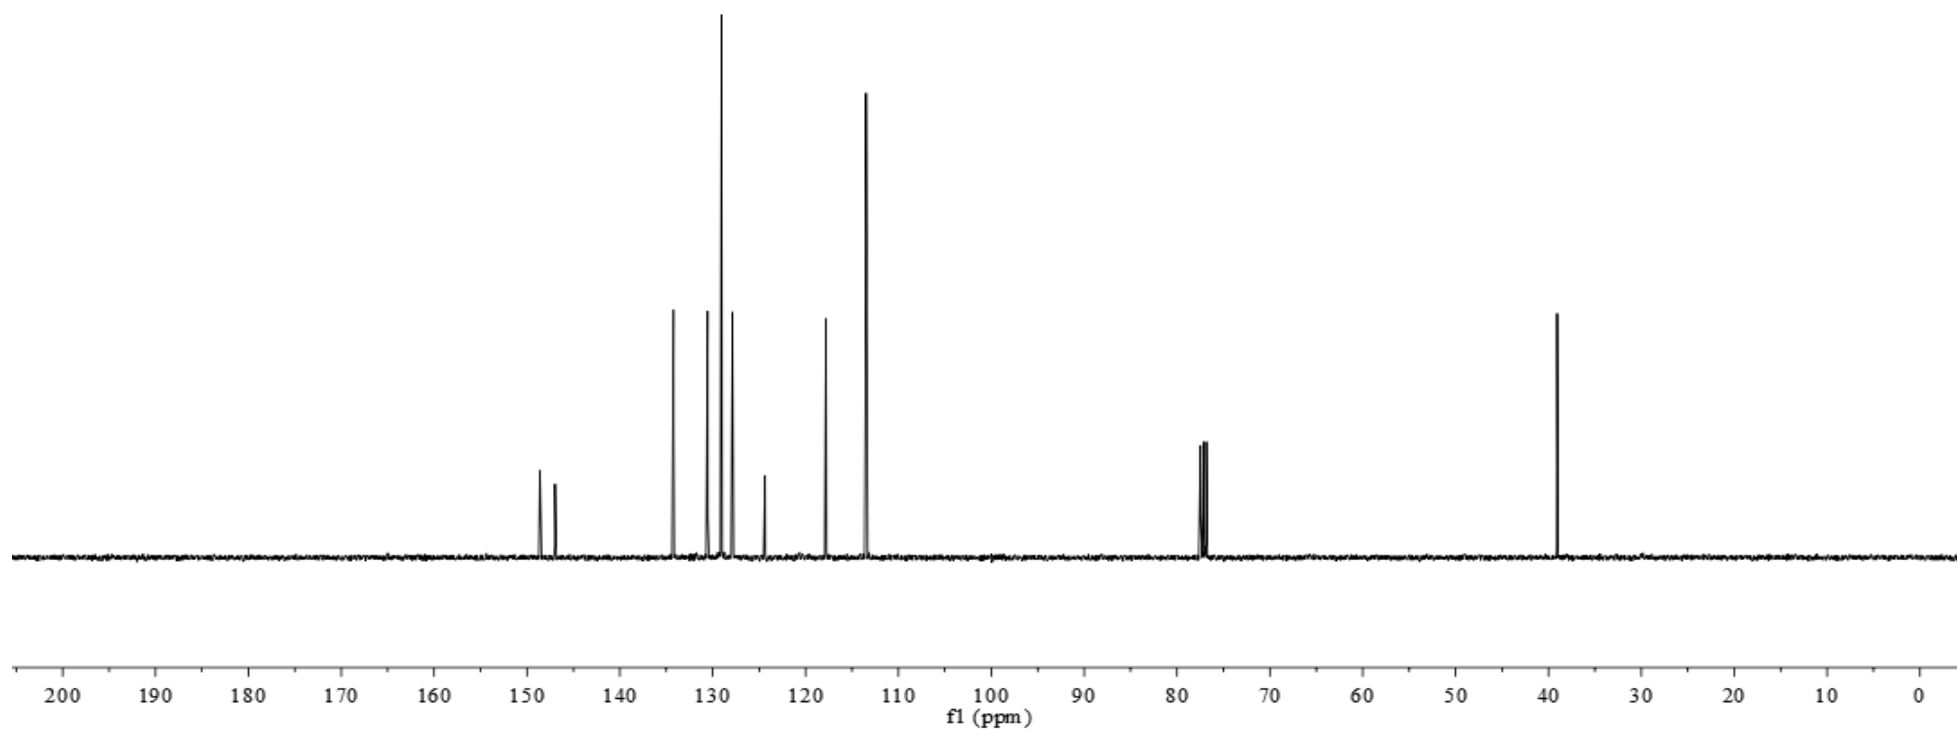

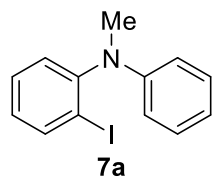

<sup>1</sup>H NMR (400 MHz, CDCl<sub>3</sub>)

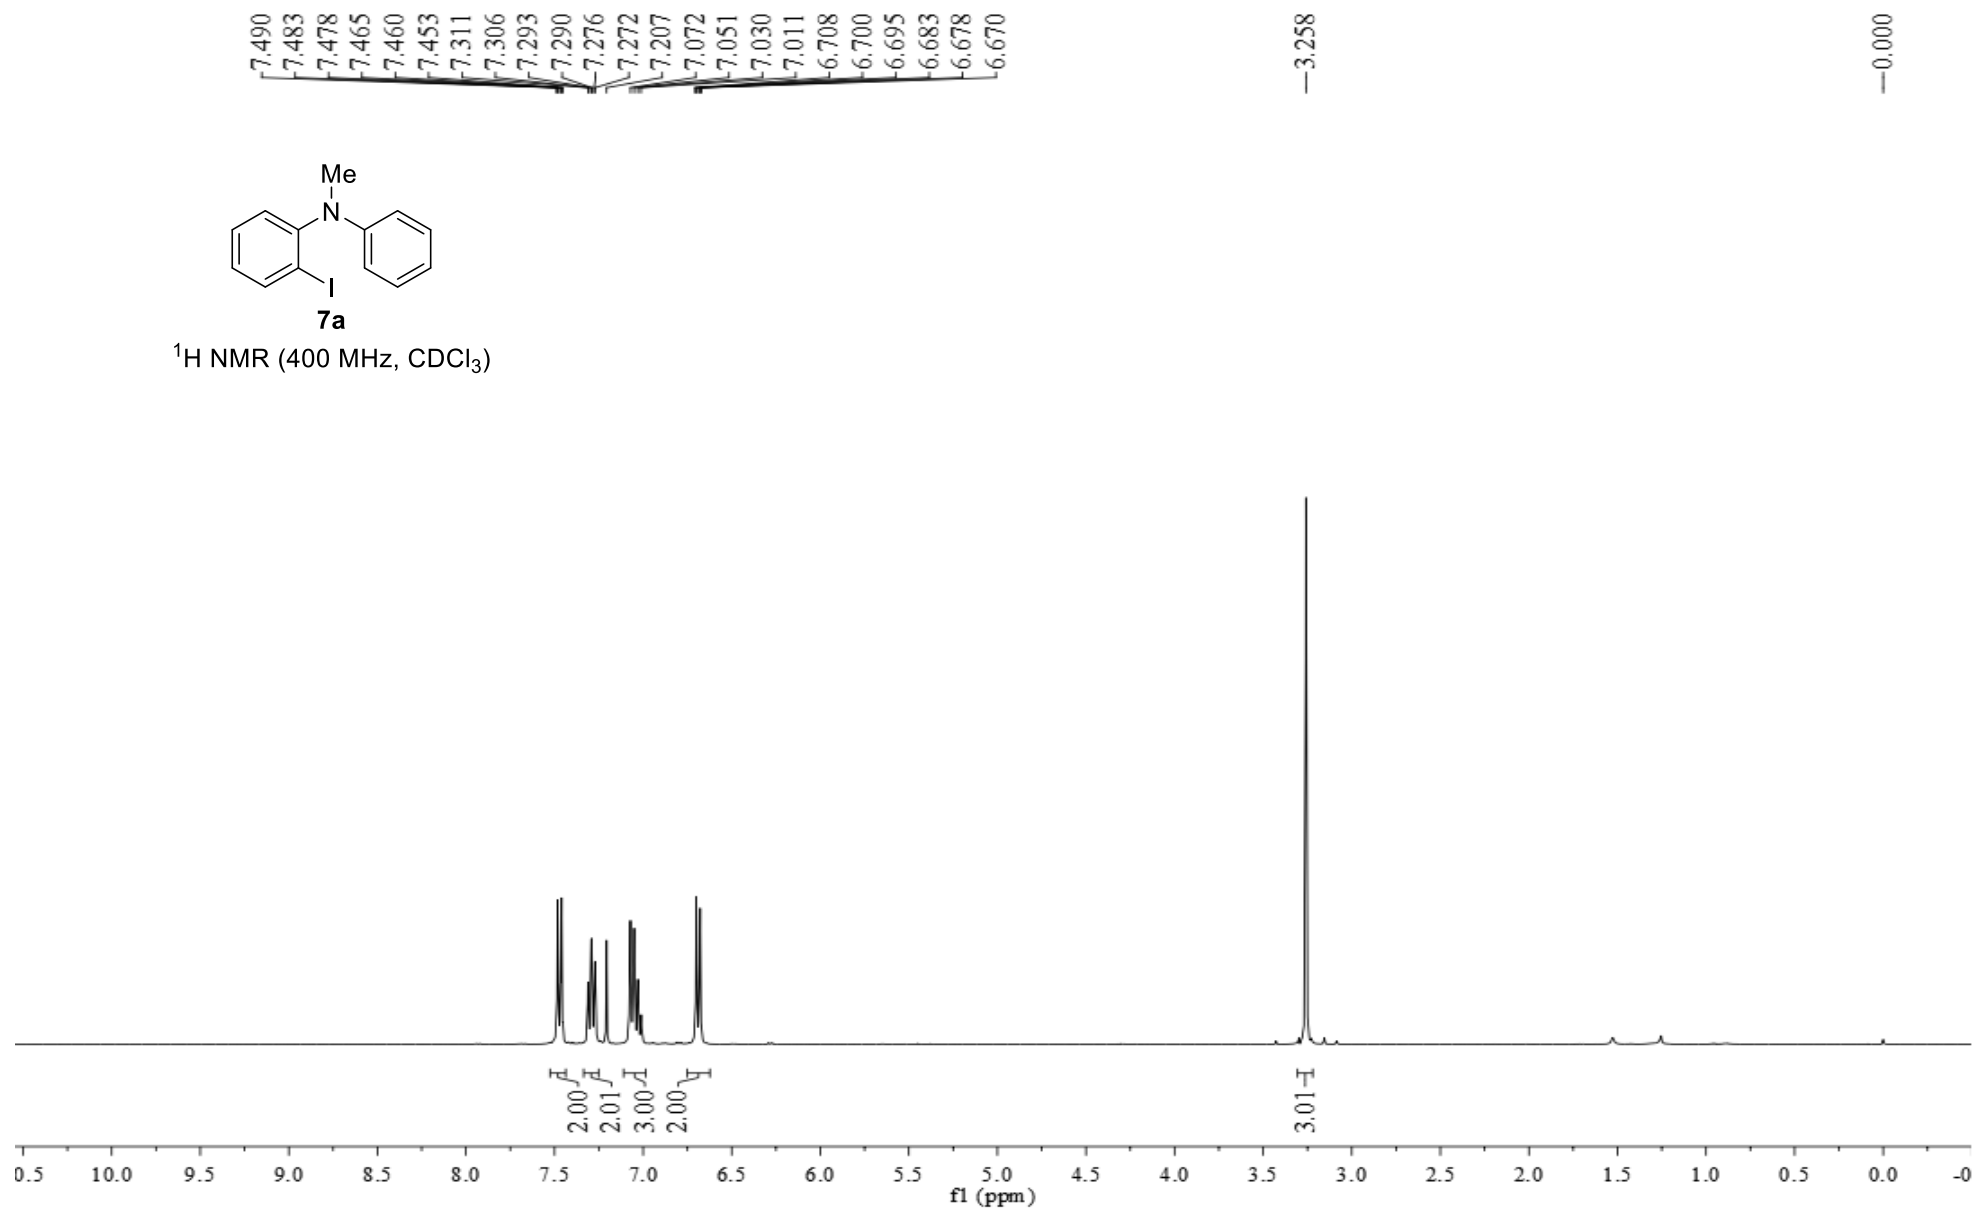

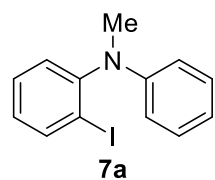

$^{13}\text{C}$  NMR (100 MHz,  $\text{CDCl}_3$ )

148.780  
148.396

137.867

129.545

123.039

122.632

120.557

82.092

77.477

77.160

76.842

40.278

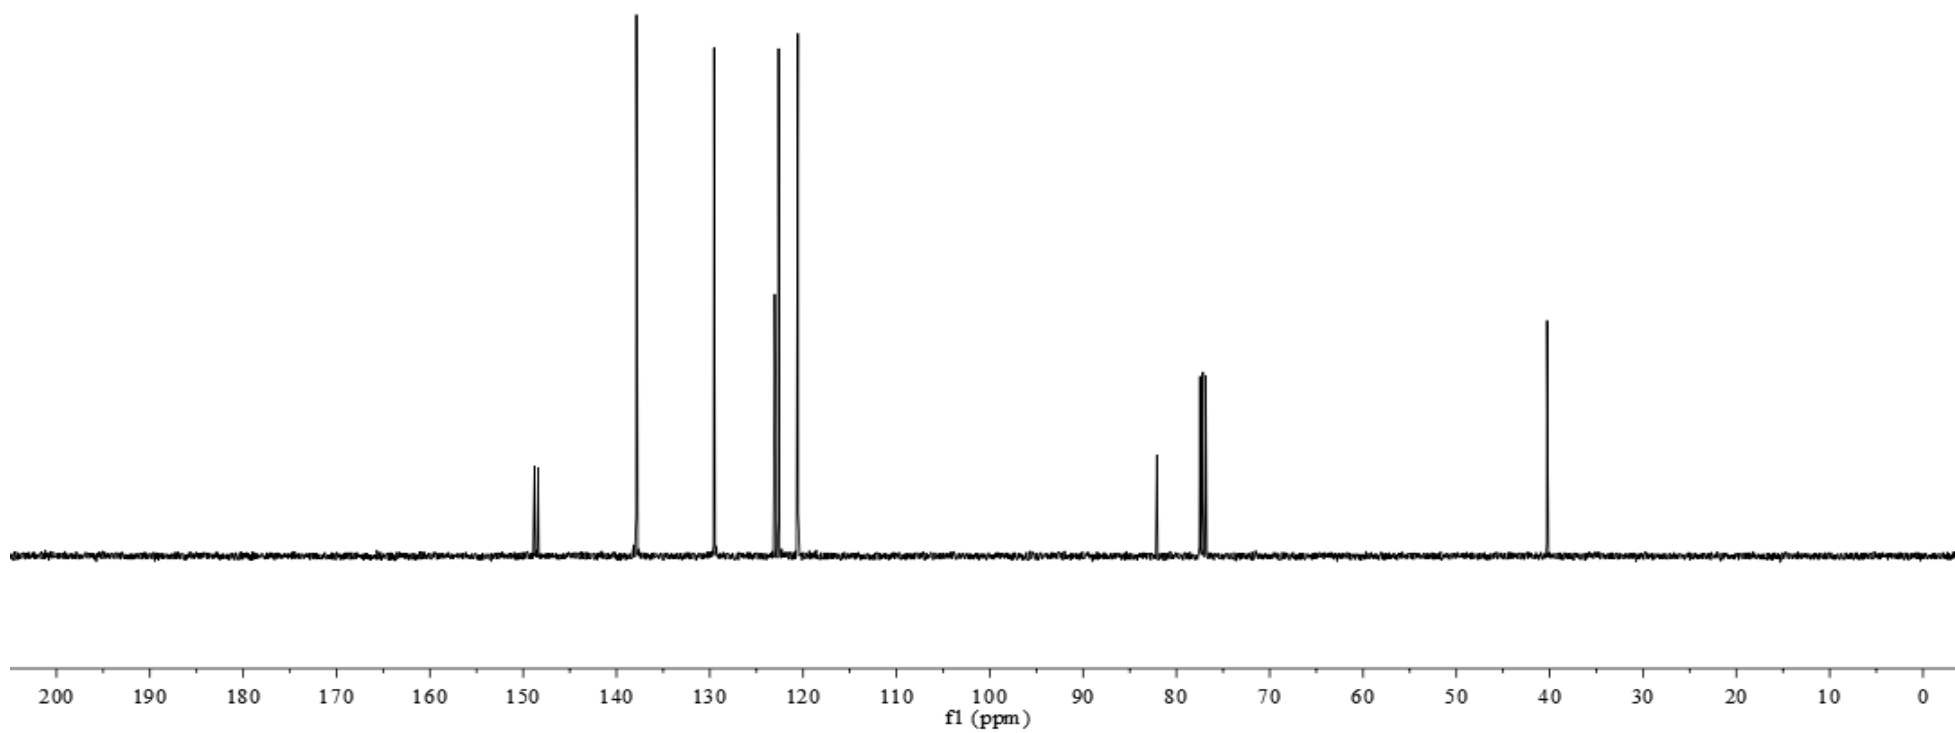

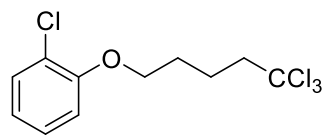

**8**

$^1\text{H}$  NMR (400 MHz,  $\text{CDCl}_3$ )

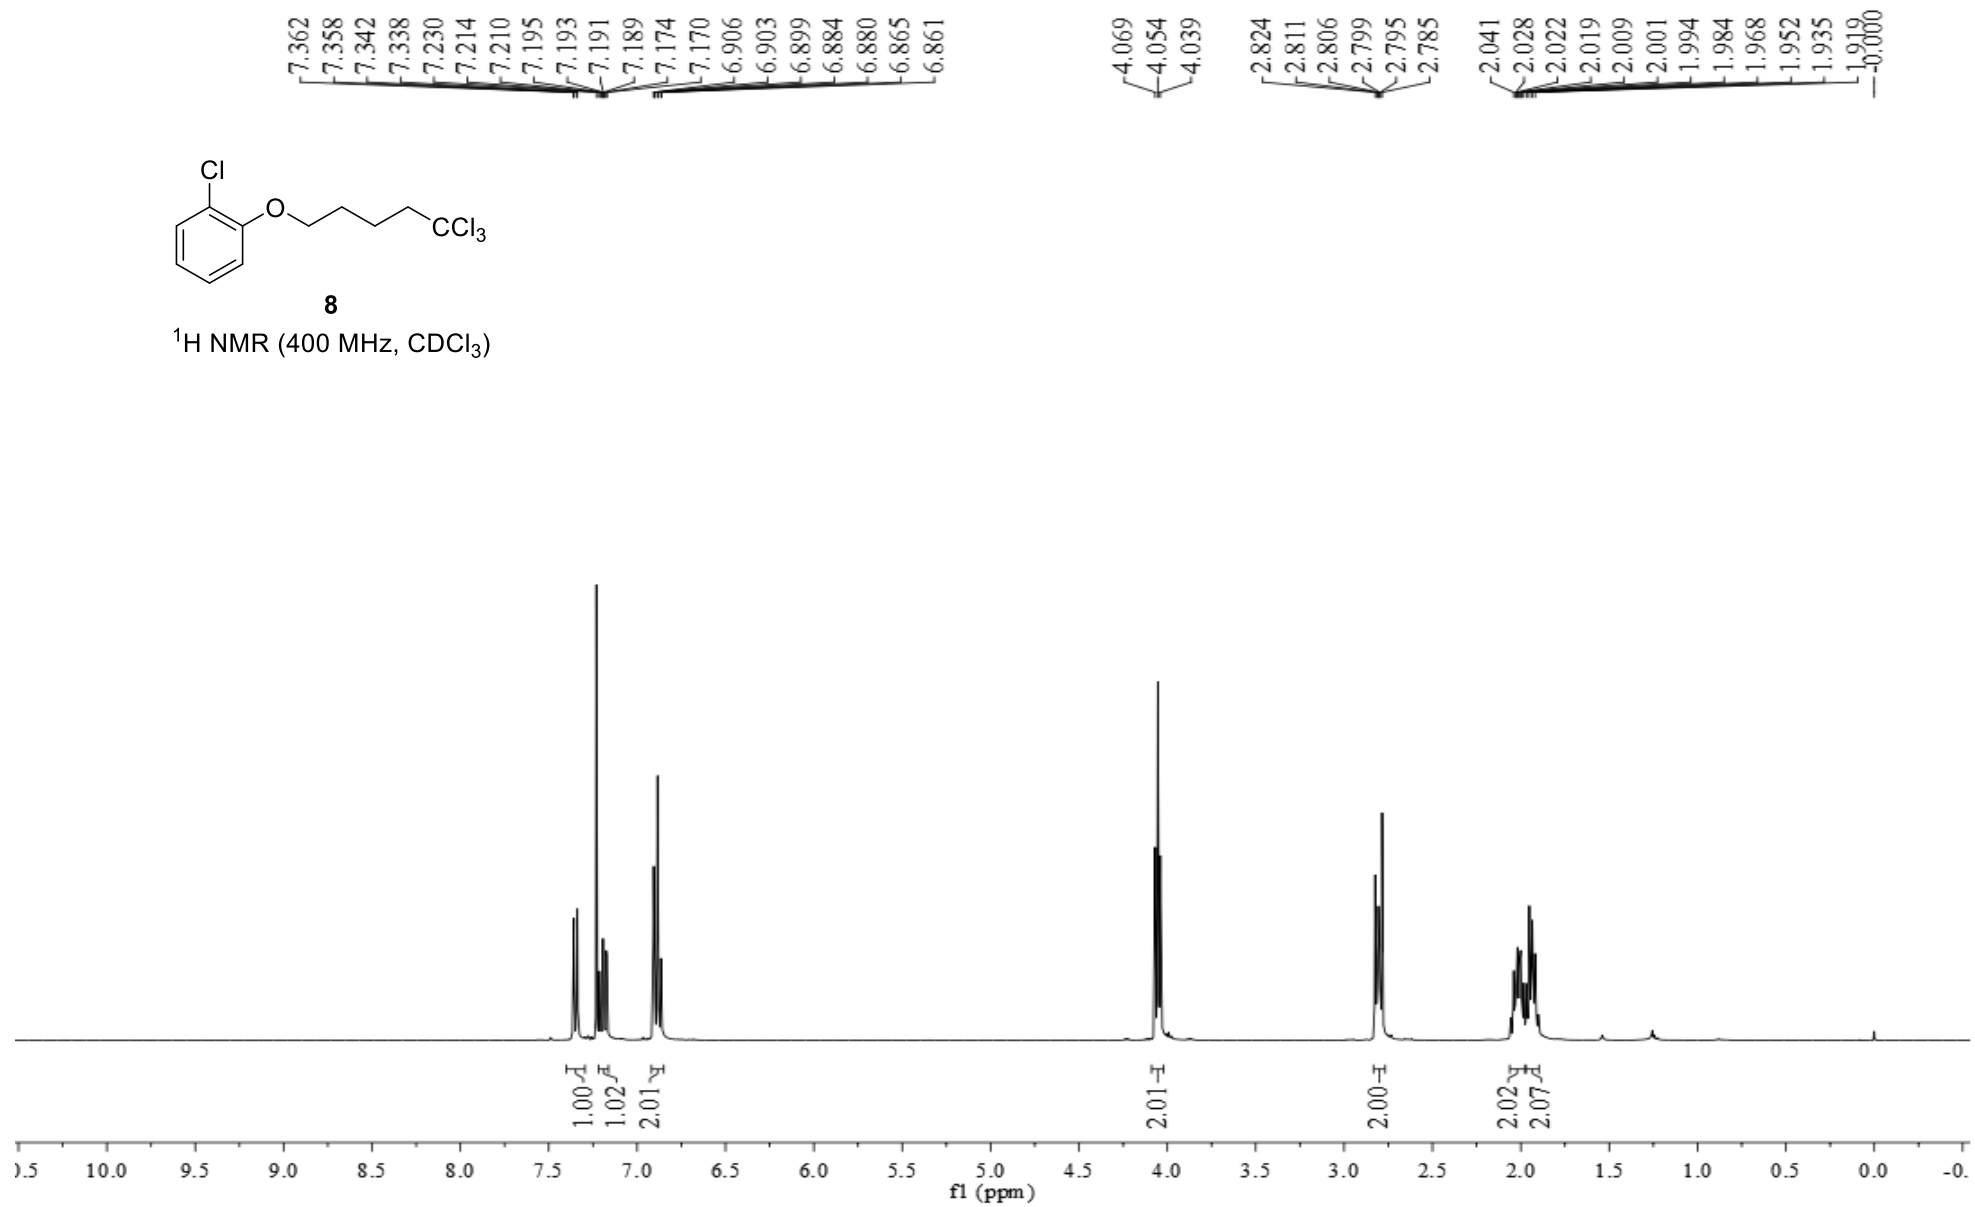

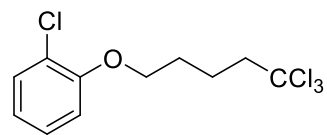

**8**

$^{13}\text{C}$  NMR (100 MHz,  $\text{CDCl}_3$ )

— 154.442

— 130.410

— 127.793

— 123.129

— 121.589

— 113.515

— 100.041

— 77.477

— 77.160

— 76.842

— 68.592

— 54.904

— 27.983

— 23.540

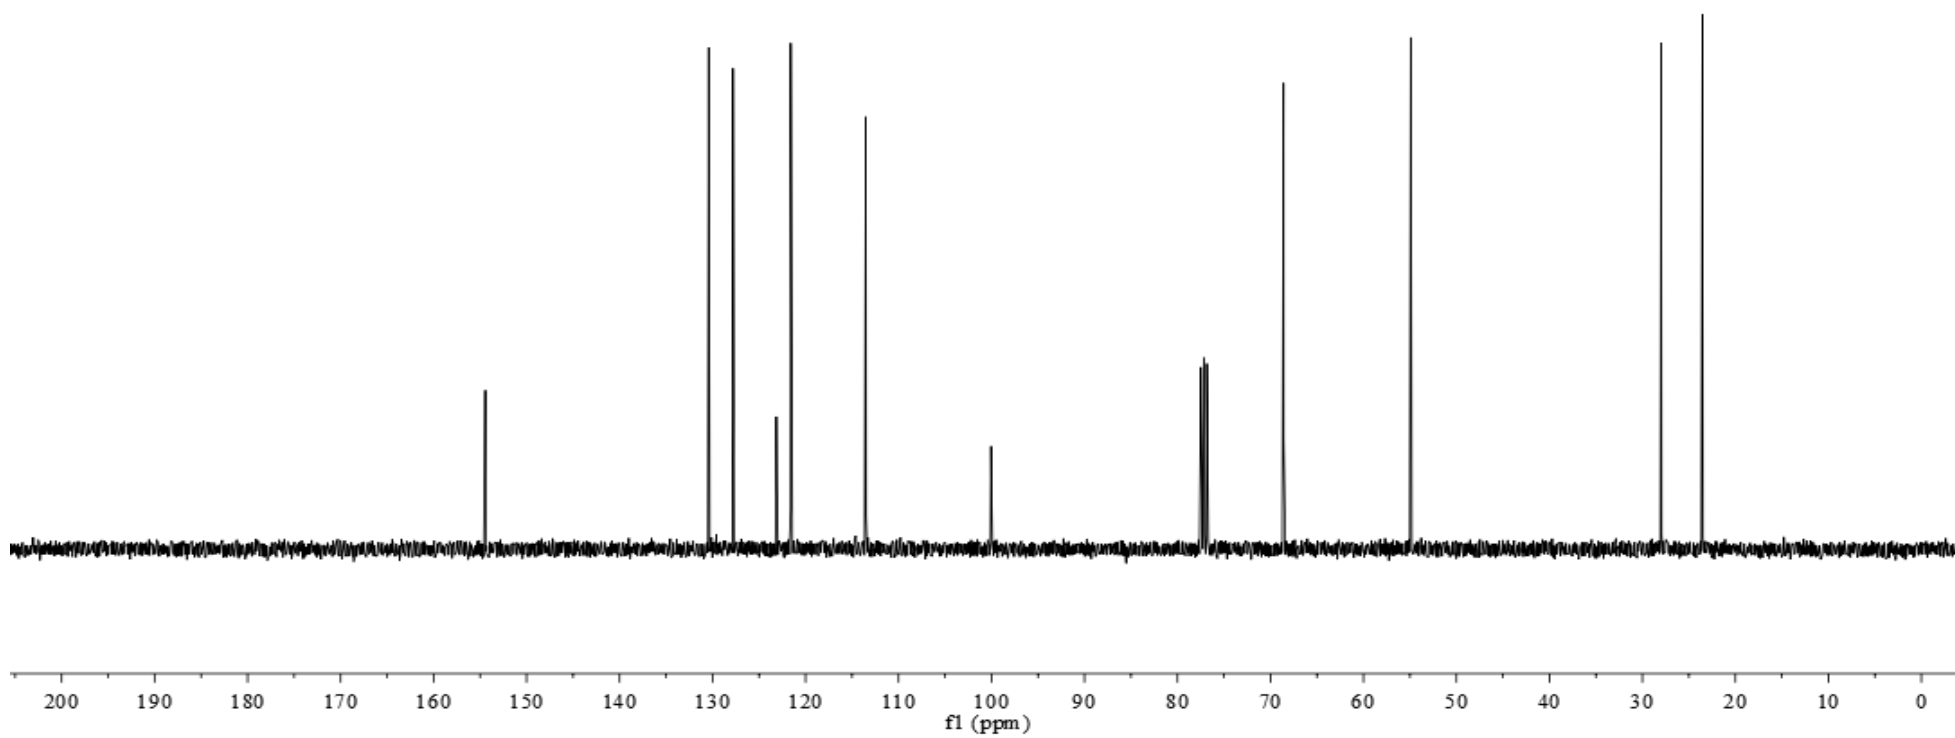

S70
